# Supplementary material for: Carborane-thiol protected copper nanoclusters: stimuli-responsive materials with tunable phosphorescence
Source: Royal Society of Chemistry journal article supplement (doi:10.1039/d2sc06578a), 2022-12-28
Supplement: d2sc06578a1.pdf [file d2sc06578a1.pdf]

## Supporting Information

### **Carborane-thiol protected copper nanoclusters: Stimuli-responsive materials with tunable phosphorescence**

Arijit Jana, Madhuri Jash, Wakeel Ahmed Dar, Jayoti Roy, Papri Chakraborty, Ganesan Paramasivam, Sergei Lebedkin, Kaplan Kirakci, Sujan Manna, Sudhadevi Antharjanam, Jan Machacek, Monika Kucerakova, Sundargopal Ghosh, Kamil Lang, Manfred M. Kappes\*, Tomas Base\* and Thalappil Pradeep\*

#### **Table of contents**

| <b>Items</b>    | <b>Description</b>                                                                                                                                                     | <b>Page No</b> |
|-----------------|------------------------------------------------------------------------------------------------------------------------------------------------------------------------|----------------|
| <b>1.</b>       | Instrumentation                                                                                                                                                        | 4-8            |
| <b>2.</b>       | Computational calculation                                                                                                                                              | 8              |
| <b>Table S1</b> | Crystal data and structure refinement for I <sub>9</sub>                                                                                                               | 9              |
| <b>Table S2</b> | Crystal data and structure refinement for Cu <sub>4</sub> @oCBT                                                                                                        | 10             |
| <b>Table S3</b> | Atomic coordinates and equivalent isotropic displacement parameters for Cu <sub>4</sub> @oCBT                                                                          | 11             |
| <b>Table S4</b> | Crystal data and structure refinement for Cu <sub>4</sub> @mCBT                                                                                                        | 12             |
| <b>Table S5</b> | Atomic coordinates and equivalent isotropic displacement parameters for Cu <sub>4</sub> @mCBT                                                                          | 13,14          |
| <b>Table S6</b> | Crystal data and structure refinement for Cu <sub>4</sub> @ICBT                                                                                                        | 15             |
| <b>Table S7</b> | Atomic coordinates and equivalent isotropic displacement parameters for Cu <sub>4</sub> @ICBT                                                                          | 16             |
| <b>Fig. S1</b>  | Photographic images of the synthesis and purification of Cu <sub>4</sub> clusters                                                                                      | 17             |
| <b>Fig. S2</b>  | Optical and SEM microscopic images of Cu <sub>4</sub> @oCBT crystals. EDS elemental analysis and elemental mapping of the same crystal                                 | 17             |
| <b>Fig. S3</b>  | Optical and SEM microscopic images of Cu <sub>4</sub> @mCBT crystals. EDS elemental analysis and elemental mapping of the crystal                                      | 18             |
| <b>Fig. S4</b>  | Optical and SEM microscopic images of Cu <sub>4</sub> @ICBT crystals. EDS elemental analysis and elemental mapping of the crystal                                      | 18             |
| <b>Fig. S5</b>  | Structural anatomy of Cu <sub>4</sub> S <sub>4</sub> kernel of Cu <sub>4</sub> @oCBT                                                                                   | 19             |
| <b>Fig. S6</b>  | Structures of Cu <sub>4</sub> @oCBT in three different orientation                                                                                                     | 19             |
| <b>Fig. S7</b>  | ORTEP structure of Cu <sub>4</sub> @oCBT                                                                                                                               | 19             |
| <b>Fig. S8</b>  | ORTEP structure of Cu <sub>4</sub> @mCBT                                                                                                                               | 20             |
| <b>Fig. S9</b>  | ORTEP structure of Cu <sub>4</sub> @ICBT                                                                                                                               | 20             |
| <b>Fig. S10</b> | Unit cell packing of Cu <sub>4</sub> S <sub>4</sub> unit of Cu <sub>4</sub> @oCBT viewed from different crystallographic axis                                          | 21             |
| <b>Fig. S11</b> | Unit cell packing of Cu <sub>4</sub> S <sub>4</sub> unit of Cu <sub>4</sub> @mCBT viewed from different crystallographic axis                                          | 21             |
| <b>Fig. S12</b> | Unit cell packing of Cu <sub>4</sub> S <sub>4</sub> unit of Cu <sub>4</sub> @ICBT viewed from different crystallographic axis                                          | 22             |
| <b>Table S8</b> | Comparative interatomic bond distance and bond angle of the respective Cu <sub>4</sub> clusters                                                                        | 22             |
| <b>Fig. S13</b> | The MS/MS fragmentation pattern of Cu <sub>4</sub> @oCBT at CE 60. Experimental isotopic distribution patterns of the fragments were matches with theoretical spectrum | 23             |
| <b>Fig. S14</b> | The MS/MS fragmentation pattern of Cu <sub>4</sub> @ICBT at CE 60.                                                                                                     | 24             |

|                  |                                                                                                                      |        |
|------------------|----------------------------------------------------------------------------------------------------------------------|--------|
|                  | Experimental isotopic distribution patterns of the fragments were matches with theoretical spectrum                  |        |
| <b>Fig. S15</b>  | TEM micrographs and EDS elemental mapping of Cu <sub>4</sub> @oCBT                                                   | 25     |
| <b>Fig. S16</b>  | TEM micrographs and EDS elemental mapping of Cu <sub>4</sub> @mCBT                                                   | 26     |
| <b>Fig. S17</b>  | TEM micrographs and EDS elemental mapping of Cu <sub>4</sub> @ICBT                                                   | 27     |
| <b>Fig. S18</b>  | TEM micrographs of Cu <sub>4</sub> @ICBT microcrystals indicating their rhombohedral shape                           | 27     |
| <b>Fig. S19</b>  | Combined <sup>11</sup> B{ <sup>1</sup> H} NMR spectra of Cu <sub>4</sub> @oCBT and O <sub>9</sub>                    | 28     |
| <b>Table S9</b>  | <sup>11</sup> B{ <sup>1</sup> H} NMR chemical shift data for Cu <sub>4</sub> @oCBT and O <sub>9</sub>                | 28     |
| <b>Fig. S20</b>  | Combined <sup>13</sup> C{ <sup>1</sup> H} NMR spectra of Cu <sub>4</sub> @oCBT and O <sub>9</sub>                    | 29     |
| <b>Fig. S21</b>  | Combined <sup>11</sup> B{ <sup>1</sup> H} NMR spectra of Cu <sub>4</sub> @mCBT and M <sub>9</sub>                    | 30     |
| <b>Table S10</b> | <sup>11</sup> B{ <sup>1</sup> H} NMR chemical shift data for Cu <sub>4</sub> @mCBT and M <sub>9</sub>                | 30     |
| <b>Fig. S22</b>  | Combined <sup>13</sup> C{ <sup>1</sup> H} NMR spectra of Cu <sub>4</sub> @mCBT and M <sub>9</sub>                    | 31     |
| <b>Fig. S23</b>  | Combined <sup>11</sup> B{ <sup>1</sup> H} NMR spectra of Cu <sub>4</sub> @ICBT and I <sub>9</sub>                    | 32     |
| <b>Table S11</b> | <sup>11</sup> B{ <sup>1</sup> H} NMR chemical shift data for Cu <sub>4</sub> @ICBT and I <sub>9</sub>                | 32     |
| <b>Fig. S24</b>  | Combined <sup>13</sup> C{ <sup>1</sup> H} NMR spectra of Cu <sub>4</sub> @ICBT and I <sub>9</sub>                    | 33     |
| <b>Fig. S25</b>  | FT-IR spectra of Cu <sub>4</sub> @oCBT along with the O <sub>9</sub>                                                 | 34     |
| <b>Fig. S26</b>  | FT-IR spectra of Cu <sub>4</sub> @mCBT along with the M <sub>9</sub>                                                 | 35     |
| <b>Fig. S27</b>  | FT-IR spectra of Cu <sub>4</sub> @ICBT along with the I <sub>9</sub>                                                 | 36     |
| <b>Fig. S28</b>  | The calculated IR spectra of Cu <sub>4</sub> @oCBT in gas phase                                                      | 37     |
| <b>Fig. S29</b>  | The calculated IR spectra of Cu <sub>4</sub> @mCBT in gas phase                                                      | 37     |
| <b>Fig. S30</b>  | Raman spectra of Cu <sub>4</sub> @oCBT crystals in comparison with O <sub>9</sub> ligand                             | 38     |
| <b>Fig. S31</b>  | Raman spectra of Cu <sub>4</sub> @mCBT crystals in comparison with M <sub>9</sub> ligand                             | 38     |
| <b>Fig. S32</b>  | Raman spectra of Cu <sub>4</sub> @ICBT crystals in comparison with I <sub>9</sub> ligand                             | 39     |
| <b>Fig. S33</b>  | XPS spectra of Cu <sub>4</sub> @oCBT                                                                                 | 39     |
| <b>Fig. S34</b>  | XPS spectra of Cu <sub>4</sub> @mCBT                                                                                 | 40     |
| <b>Fig. S35</b>  | XPS spectra of Cu <sub>4</sub> @ICBT                                                                                 | 40     |
| <b>Fig. S36</b>  | PL spectra of these clusters in solution and respective crystalline state reveals their CIE nature                   | 41     |
| <b>Fig. S37</b>  | Photographs and the respective PL spectra of Cu <sub>4</sub> @oCBT and Cu <sub>4</sub> @mCBT suggesting AIE behavior | 41     |
| <b>Fig. S38</b>  | Structural variation of Cu <sub>4</sub> @oCBT and Cu <sub>4</sub> @mCBT clusters in solution and crystals            | 42     |
| <b>Fig. S39</b>  | Different types of intermolecular interactions present in Cu <sub>4</sub> @oCBT                                      | 42     |
| <b>Fig. S40</b>  | Different types of intermolecular interaction present in Cu <sub>4</sub> @mCBT                                       | 43     |
| <b>Fig. S41</b>  | Different types of intermolecular interaction present in Cu <sub>4</sub> @ICBT                                       | 43     |
| <b>Fig. S42</b>  | Lifetime decay profile of clusters at 295 K with respective fittings                                                 | 43     |
| <b>Fig. S43</b>  | PL spectra indication oxygen sensitivity of these clusters                                                           | 44     |
| <b>Fig. S44</b>  | Natural transition orbitals for singlet excitation of Cu <sub>4</sub> @mCBT                                          | 44     |
| <b>Fig. S45</b>  | Natural transition orbitals for singlet excitation of Cu <sub>4</sub> @ICBT                                          | 45     |
| <b>Table S12</b> | Calculated excited triplet state energies in eV                                                                      | 45     |
| <b>Table S13</b> | Calculated excited triplet state energies in nm                                                                      | 45     |
| <b>Fig. S46</b>  | Structural relaxation of the clusters during intersystem crossing                                                    | 46     |
| <b>Fig. S47</b>  | NTOs of T1 and T1' radiative relaxation of a) Cu <sub>4</sub> @mCBT and b) Cu <sub>4</sub> @ICBT clusters.           | 47     |
| <b>Fig. S48</b>  | Lifetime decay profile of clusters at 5 K with respective fittings                                                   | 47     |
| <b>Table S14</b> | Assignments of different lattice planes (h k l) of Cu <sub>4</sub> @oCBT                                             | 47, 48 |

|                  |                                                                                                                                        |        |
|------------------|----------------------------------------------------------------------------------------------------------------------------------------|--------|
| <b>Table S15</b> | Assignments of different lattice planes (h k l) of Cu <sub>4</sub> @mCBT                                                               | 48, 49 |
| <b>Table S16</b> | Assignments of different lattice planes (h k l) of Cu <sub>4</sub> @ICBT                                                               | 49, 50 |
| <b>Fig. S49</b>  | Comparative Raman spectra of Cu <sub>4</sub> @oCBT during mechanical grinding and solvent fuming experiment                            | 51     |
| <b>Fig. S50</b>  | Comparative Raman spectra of Cu <sub>4</sub> @mCBT during mechanical grinding and solvent fuming experiment                            | 51     |
| <b>Fig. S51</b>  | Differential scanning calorimetry data of Cu <sub>4</sub> @oCBT                                                                        | 52     |
| <b>Fig. S52</b>  | Magnified PXRD pattern of Cu <sub>4</sub> @oCBT microcrystalline powder after heating at different temperatures                        | 52     |
| <b>Fig. S53</b>  | Differential scanning calorimetry data of Cu <sub>4</sub> @mCBT microcrystals                                                          | 53     |
| <b>Fig. S54</b>  | Magnified PXRD pattern of Cu <sub>4</sub> @mCBT microcrystalline powder after heating at different temperatures                        | 53     |
| <b>Fig. S55</b>  | TGA DTG spectra shown less thermal stability of Cu <sub>4</sub> @ICBT in comparison to Cu <sub>4</sub> @oCBT and Cu <sub>4</sub> @mCBT | 54     |
| <b>Fig. S56</b>  | Differential scanning calorimetry profile of Cu <sub>4</sub> @ICBT                                                                     | 54     |
| <b>Fig. S57</b>  | ESI-MS spectrum of <i>ortho</i> -carborane 9-thiol                                                                                     | 55     |
| <b>Fig. S58</b>  | ESI-MS spectrum of <i>meta</i> -carborane 9-thiol                                                                                      | 55     |
| <b>Fig. S59</b>  | ESI-MS spectrum of <i>ortho</i> -carborane 12-iodo 9-thiol                                                                             | 56     |
| <b>Fig. S60</b>  | Molecular structure and unit cell molecular packing of I <sub>9</sub>                                                                  | 56     |
| <b>Fig. S61</b>  | Intermolecular interactions between two I <sub>9</sub> units                                                                           | 57     |
| <b>Fig. S62</b>  | Molecular structure and combined unit cell molecular packing of I <sub>9</sub>                                                         | 57     |
| <b>Fig. S63</b>  | UV-vis absorption and ESI-MS spectra of [Cu <sub>18</sub> (DPPE) <sub>6</sub> (H) <sub>16</sub> ] <sup>2+</sup>                        | 58     |
| <b>3.</b>        | References                                                                                                                             | 59,60  |

## 1. Instrumentation

### UV-vis spectroscopy

Solid-state absorption spectra of the NCs (as polycrystalline powders dispersed in perfluoroether oil between two quartz plates) were recorded using an Agilent Cary 5000 UV-Vis-NIR spectrophotometer equipped with a 6-inch integrating sphere. As a standard feature of such apparatus, a photodetector (photomultiplier) is placed directly into the sphere, inside a slit on its bottom. This configuration can be, however, problematic for highly luminescent samples, as is the case with the NCs studied in this work. Namely, UV photons absorbed by the NCs (white powders) are efficiently converted into the green or orange luminescence photons which would be detected by the same photomultiplier, resulting to incorrect absorbance values. In fact, even a 'negative absorbance' can be observed in the UV region, if a photomultiplier has a higher sensitivity to the green/ orange light than to the UV one. To minimize such interference of re-emitted light, the photomultiplier in the sphere was covered in our experiment with a short-pass dielectric filter (Edmund Optics) transmitting light within ca. 240-500 nm and blocking the NCs emission over ca. 510-700 nm. Accordingly, the solid-state absorption spectra were measured within a limited spectral range of 250-490 nm (Figure 4a-c). Absorption spectra in solution were recorded in standard cuvettes using a PerkinElmer Lambda 365 spectrometer in the wavelength range of 200-800 nm.

### Mass spectrometry

Mass spectra of *ortho*-carborane 9-thiol, *meta*-carborane 9-thiol and *ortho*-carborane 12-iodo 9-thiol were recorded using an ion-trap Thermo Scientific LTQ XL mass spectrometer. Mass spectra of all these Cu<sub>4</sub> clusters were measured using Waters Synapt G2Si HDMS instrument. The instrument is equipped with electrospray ionization source, step wave ion transfer optics and a quadrupole mass filter. 1 mM formic acid and cesium acetate were used as a protonation source. Mass spectrum of the nanoclusters were recorded in positive ion-mode. An optimized condition of capillary voltage 3 kV, cone voltage 0 kV, spray current 110 nA, source temperature 50 °C and desolvation temperature 90 °C with gas flow rate of 300 L/h were used for these measurements. Collision energy dependent fragmentation studies were performed upon selecting the particular ion inside the ion mobility cell of the same instrument.

### Photoluminescence

Photoluminescence spectra were measured using Horiba Jobin Yvon Nanolog and Fluorolog-3 spectrometers. The latter instrument was equipped with an optical cryostat based on a closed-cycle helium cryocooler (Cryomex), operating within a temperature range of 5-300 K. Fast freezing of sample solutions and their cooling down was done by inserting a quartz tube with the probe into an optical Dewar filled with liquid nitrogen. All emission spectra were corrected for wavelength-dependent response of the spectrometer and detector (in relative photon flux units).



### **Lifetime and quantum yield**

Luminescence lifetime measurements at ambient temperature were performed using a Fluorolog-3 spectrometer equipped with a cooled TBX-05-C photon detection module (Horiba JobinYvon). The excitation wavelength was 390 nm (SpectraLED-390, Horiba Scientific) and emission wavelength was selected at the maxima of the luminescence emission spectra. The decay curves were recorded in air atmosphere and were fitted to exponential functions by the iterative reconvolution procedure of the DAS6 software (v. 6.8, Horiba Jobin Yvon). The temperature-dependent PL decay in the cryostat was recorded by connecting a photomultiplier to a fast digital oscilloscope (via a 50, 500, 2.500 or 10.000 Ohm load depending on the decay time scale) and using a nsec-pulsed nitrogen laser for excitation at 337 nm. Absolute photoluminescence quantum yields of powder samples were measured at ambient temperature using a Quantaaurus QY C11347-1 spectrometer (Hamamatsu).

### **Infrared spectroscopy**

Perkin Elmer FT-IR spectrometer was used to measure the samples. Each pellet was prepared by mixing 2.0 mg NCs with 20 mg dry KBr.

### **Raman spectroscopy**

Raman spectra were recorded using a CRM-Alpha 300S, WI Tec GmbH confocal Raman microscope, equipped with 532 nm frequency doubled Nd:YAG laser and 632 nm Helium Neon laser.

### **NMR spectroscopy**

Proton decoupled  $^{13}\text{C}$  and  $^{11}\text{B}$  NMR spectra were recorded in its respective deuterated solvents, using a Bruker Avance 500 MHz ( $^{13}\text{C}$ -125 MHz and  $^{11}\text{B}$ -160 MHz) spectrometer. All of the data are processed using Mest-Re Nova NMR software. NMR spectrum for  $\text{Cu}_4@o\text{CBT}$  and  $\text{Cu}_4@i\text{CBT}$  clusters were recorded using  $d_6$ -acetone solvent. All of the carborane ligands and  $\text{Cu}_4@m\text{CBT}$  NMR data were measured using  $\text{CDCl}_3$  (99.99 % pure) solvent.

### **X-ray photoelectron spectroscopy**

X-ray photoelectron spectroscopy were recorded using ESCA probe TPD equipped with polychromatic  $\text{Mg K}\alpha$  X ray source ( $h\nu = 1253.6$  eV).

### **Powder XRD**

Powder XRD measurements were performed using a D8 Advance, Bruker instruments using  $\text{Cu K}\alpha$  as a X-Ray source ( $h\nu = 8047.8$  eV). Sample drop casted on a glass slide, like a thin film was used for all the PXRD measurements.

## Thermogravimetric analysis

Thermogravimetric (TG) measurements of about 3.5 mg of cluster sample in an alumina crucible were performed using a NETZSCH STA 449 F3 Jupiter instruments equipped with Proteus-6.1.0 software. Both the measurements were performed under nitrogen atmosphere at flow rate of 20 ml/min in the temperature range of 30 to 700 °C with a heating rate of 10 °C/min.

## Single-crystal XRD of Cu<sub>4</sub> clusters

Single crystal X-ray diffraction (SC-XRD) data collection of Cu<sub>4</sub> clusters was performed with Bruker D8 VENTURE single crystal X-ray diffractometer equipped with graphite monochromatic Mo (K $\alpha$ ) ( $\lambda = 0.71073 \text{ \AA}$ ) radiation and PHOTON 100 CMOS detector. The data collection was performed at 296 K for Cu<sub>4</sub>@oCBT and Cu<sub>4</sub>@mCBT and at liquid nitrogen temperature of 200 K for the crystal of Cu<sub>4</sub>@ICBT. The automatic cell determination routine, with 24 frames at two different orientations of the detector was employed to collect reflections for unit cell determination. Further, intensity data for structure determination were collected through an optimized strategy which gave an average 4-fold redundancy. The program APEX3-SAINT (Bruker, 2016) was used for integrating the frames, followed by a multi-scan absorption correction using the program SADABS (Bruker, 2016). The structure was solved by SHELXT-2014 (Sheldrick, 2014) and refined by full-matrix least squares techniques using SHELXL-2018, (Sheldrick, 2018) software package. Hydrogens on all carbon and boron atoms were fixed at calculated positions and refined as riding model with C-H or B-H = 1.10  $\text{\AA}$ , Uiso(H) = 1.2Ueq (C or B).

For, Cu<sub>4</sub>@oCBT crystal data was refined as a two component inversion twin with a BASF value of 0.188. The refinement was converged with an R1 value of 0.051. In this case an alert level B was observed in the IUCR check cif report which is primarily due to disorder in carborane moiety and also due to twinning of the crystal lattice.

In the case of Cu<sub>4</sub>@mCBT, the higher angle reflections are very weak ( $\theta > 23.3^\circ$ ) due to poor resolution of the crystal which caused high Rint value of 0.18 (R1 = 0.098). Five B level alerts were observed in the IUCR check cif report which were explained through validating response form at the end of the corresponding cif file.

For Cu<sub>4</sub>@ICBT, high resolution data is very weak and hence a resolution cut ( $\sim 1.0 \text{ \AA}$ ) was made during data integration. The data was refined as two component inversion twin with BASF value of 0.286. Due to very high thermal and rotational disorder of carborane moieties and also due to poor resolution data, DFIX restraint was applied to their bond distances (a target value of 1.72  $\text{\AA}$ ) to maintain a sensible molecular geometry. Also SIMU restraint was applied to atoms in the carborane moieties with an effective standard deviation of 0.02  $\text{\AA}^2$  to have the same Uij components. The components of the anisotropic displacement parameters in the direction of the bond are restrained to be equal for all non-hydrogen atoms using DELU restraint. The solvent

electron density could not be modelled satisfactorily due to difficulty in locating their position in this low resolution data and hence squeezed using PLATON (version 10719) and the squeeze results are appended in the corresponding cif file. Several attempts were made to collect SC-XRD data at room temperature as well as at low temperatures. This is the best data we could obtain after repeated attempts. Although, it is a low resolution data, the structure is presented here to describe its formation with the support of other experimental findings. A cif check report was made using the service of IUCR in which A and B level alerts were explained at the end of the corresponding cif file as validation response form.

### **SC-XRD of I<sub>9</sub> ligand**

Crystals suitable for single crystal X-ray diffraction were obtained by slow sublimation of I<sub>9</sub> in a sealed ampoule over a few weeks. Single crystal was measured at 95 K on a Supernova four-circles diffractometer equipped with a CCD Atlas S2 detector, using the mirrors-collimated Cu-K $\alpha$  radiation ( $\lambda = 1.54184 \text{ \AA}$ ) from a micro-focus tube and a Cryostream 800 + chiller. The CrysAlis program suite was used for the unit cell determination and data reduction.<sup>1</sup> The crystal structure was solved by charge-flipping using program SUPERFLIP<sup>2</sup> and refined by full-matrix least-squares on F2 using the Jana2020 program package, not yet published successor of Jana2006.<sup>3</sup>

Hydrogen atoms bonded to C and B atoms were discernible in difference Fourier maps and were kept in ideal positions with C–H distance = 0.96  $\text{\AA}$  and B–H distance = 1  $\text{\AA}$ . For all hydrogen atoms, Uiso(H) was set to 1.2Ueq(C/B) of the parent atom. Precise position of the hydrogen atom attached to sulfur in the structure of I<sub>9</sub> was not observed in the difference Fourier map, probably due to multiple possible positions. All non-hydrogen atoms were refined using harmonic refinement. The structure shows two independent molecules per unit cell with a disorder manifested by mixed sulfur and iodine occupancies. Mixed site S/I occupancies 0.768:0.232 for one molecule and 0.933:0.067 for the other molecules per unit cell solved the problems of some atoms showing negative thermal parameters.

In the structure, the residual electron density occurs close to the atoms B<sub>5</sub> and B<sub>11</sub>. These maxima probably correspond to an iodine atom with an occupation of 0.02 and point to possible additional disorder of both molecules. However, boron or carbon atoms with 2% occupation is not possible to observe in the electron density map. Apparently, reliable description of the disorder in is far beyond resolution of our data, although there is no doubt it exists. For these reasons, we did not introduce disorder to the final structure model.

### **Optical imaging**

Optical microscopic images of the crystal were collected in different magnification using LEICA optical microscope equipped with LAS V4.8 software.

## SEM imaging

The SEM measurements were performed using FEI quanta environmental scanning electron microscope (ESEM) at high vacuum mode at operating voltage 30 kV. EDAX spectra and elemental imaging were recorded using the same instruments.

## TEM imaging

Dimension of the nanoclusters were recorded using Transmission electron microscopy, which was recorded using a JEOL 3010 high resolution transmission electron microscope operated at 200 kV. A Gatan multistage CCD camera was used to record the image.

## 2. Computational calculations

The structural, electronic and optical absorption properties of the Cu<sub>4</sub> nanoclusters protected with a monolayer of *ortho*-carborane 9-thiol (O<sub>9</sub>), *meta*-carborane 9-thiol (M<sub>9</sub>) and *ortho*-carborane 12-iodo 9-thiol (I<sub>9</sub>) ligands were computationally studied using density functional theory (DFT) as implemented in grid spaced projector augmented wave (GPAW) software package.<sup>4,5</sup> The effective valence electrons of all the atoms in the considered cluster are described by the PAW set-ups such as Cu (3d<sup>10</sup> 4s<sup>1</sup>), S (3s<sup>2</sup>3p<sup>4</sup>), C (2s<sup>2</sup>2p<sup>2</sup>), B (2s<sup>2</sup>2p<sup>1</sup>) and H (1s<sup>1</sup>). For geometry optimizations, the cluster boundary condition was set by taking the structure in a cubic box and a grid spacing of 0.2 Å was considered for the greater accuracy of real space for electron density inside the cubic box. Further, the convergence criterion to minimize the forces between the atoms in the cluster was to be 0.05 eV/Å, without imposing any symmetry constraints. The PBE (Perdew-Burke-Ernzerhof) exchange-correlation functional was utilized in the calculations as it describes the metal interactions in the cluster.<sup>6,7</sup> The atomic coordinates taken from the crystal structure of Cu<sub>4</sub> cluster were used as a starting point for the geometry optimization. The optimized Cu<sub>4</sub> structures were utilized to calculate the absorption spectra using Gaussian09. Further, the Cu<sub>4</sub> structures were once optimized to investigate the geometrical changes in gas and solvent phases. Solvent effects were modelled by the Polarizable Continuum Model (PCM) with solvent excluding surface, using parameters of dichloromethane for Cu<sub>4</sub>@mCBT, and acetone for Cu<sub>4</sub>@oCBT and Cu<sub>4</sub>@ICBT.<sup>8-10</sup> The IR spectra were calculated for the optimized structures in gas phases from their frequency calculations. All the structures were visualized using visual molecular dynamics (VMD) software.

The excited state emission characteristics were studied using the Gaussian 16 quantum chemistry package<sup>11</sup> within the frame of the Density Functional Theory (DFT) and the Time Dependent DFT (TD-DFT). The hybrid exchange–correlation functional PBE0 by Adamo<sup>12</sup> was used (PBE1PBE in the notation of the Gaussian input) and Los Alamos National Laboratory double-zeta basis LANL2DZ with scalar-relativistic effective core potentials on heavier elements (sulphur and iodine).<sup>13</sup>

**Table S1.** Crystal data and structure refinement for I<sub>9</sub> ligand

|                                   |                                                                                                       |
|-----------------------------------|-------------------------------------------------------------------------------------------------------|
| Identification code               | I <sub>9</sub> ligand                                                                                 |
| Empirical formula                 | C <sub>2</sub> B <sub>10</sub> H <sub>10</sub> I S                                                    |
| Formula weight                    | 301.16                                                                                                |
| Temperature                       | 95 K                                                                                                  |
| Wavelength                        | 1.54184 Å                                                                                             |
| Crystal system                    | monoclinic                                                                                            |
| Space group                       | P 21/n                                                                                                |
| Unit cell dimensions              | a = 14.1490 (6) Å      α = 90°<br>b = 7.7293 (3) Å      β = 91.659°<br>c = 20.6546 (9) Å      γ = 90° |
| Volume                            | 2257.88 (16) Å <sup>3</sup>                                                                           |
| Z                                 | 4                                                                                                     |
| Density (calculated)              | 1.772 gm/cm <sup>3</sup>                                                                              |
| Absorption coefficient            | 23.481 mm <sup>-1</sup>                                                                               |
| F(000)                            | 1128                                                                                                  |
| Crystal size                      | 0.072 x 0.032 x 0.02 mm <sup>3</sup>                                                                  |
| Theta range for data collection   | 2.13 to 37.14°.                                                                                       |
| Index ranges                      | -16 ≤ h ≤ 17, -9 ≤ k ≤ 8, -20 ≤ l ≤ 25                                                                |
| Reflections collected             | 13000                                                                                                 |
| Independent reflections           | 4635 [R(reflection) = 0.0388]                                                                         |
| Completeness to theta = 37.31°    | 97.9 %                                                                                                |
| Absorption correction             | Empirical Gaussian integration                                                                        |
| Max. and min. transmission        | 0.625 and 0.467                                                                                       |
| Refinement method                 | Full-matrix least-squares on F <sup>2</sup>                                                           |
| Data / restraints / parameters    | 4538 / 0 / 259                                                                                        |
| Goodness-of-fit on F <sup>2</sup> | 1.569                                                                                                 |
| Final R indices [I > 2σ(I)]       | R1 = 0.0388, wR2 = 0.0453                                                                             |
| R indices (all data)              | R1 = 0.0564, wR2 = 0.0485                                                                             |
| Absolute structure parameter      | 0.16 (4)                                                                                              |
| Extinction coefficient            | n/a                                                                                                   |

**Table S2.** Crystal data and structure refinement for [Cu<sub>4</sub>@oCBT].

|                                   |                                                                               |          |
|-----------------------------------|-------------------------------------------------------------------------------|----------|
| Identification code               | Cu <sub>4</sub> @oCBT                                                         |          |
| Empirical formula                 | C <sub>8</sub> H <sub>44</sub> B <sub>40</sub> Cu <sub>4</sub> S <sub>4</sub> |          |
| Formula weight                    | 955.23                                                                        |          |
| Temperature                       | 296(2) K                                                                      |          |
| Wavelength                        | 0.71073 Å                                                                     |          |
| Crystal system                    | Trigonal                                                                      |          |
| Space group                       | P3 <sub>1</sub> 21                                                            |          |
| Unit cell dimensions              | a = 11.4344(6) Å                                                              | α = 90°  |
|                                   | b = 11.4344(6) Å                                                              | β = 90°  |
|                                   | c = 29.4398(16) Å                                                             | γ = 120° |
| Volume                            | 3333.4(4) Å <sup>3</sup>                                                      |          |
| Z                                 | 3                                                                             |          |
| Density (calculated)              | 1.428 Mg/m <sup>3</sup>                                                       |          |
| Absorption coefficient            | 2.091 mm <sup>-1</sup>                                                        |          |
| F(000)                            | 1416                                                                          |          |
| Crystal size                      | 0.200 x 0.150 x 0.150 mm <sup>3</sup>                                         |          |
| Theta range for data collection   | 2.922 to 26.057°.                                                             |          |
| Index ranges                      | -14 ≤ h ≤ 13, -14 ≤ k ≤ 14, -36 ≤ l ≤ 36                                      |          |
| Reflections collected             | 64165                                                                         |          |
| Independent reflections           | 4384 [R(int) = 0.0563]                                                        |          |
| Completeness to theta = 25.242°   | 99.6 %                                                                        |          |
| Absorption correction             | Semi-empirical from equivalents                                               |          |
| Max. and min. transmission        | 0.7453 and 0.6112                                                             |          |
| Refinement method                 | Full-matrix least-squares on F <sup>2</sup>                                   |          |
| Data / restraints / parameters    | 4384 / 0 / 255                                                                |          |
| Goodness-of-fit on F <sup>2</sup> | 1.121                                                                         |          |
| Final R indices [I > 2σ(I)]       | R1 = 0.0513, wR2 = 0.1266                                                     |          |
| R indices (all data)              | R1 = 0.0570, wR2 = 0.1305                                                     |          |
| Absolute structure parameter      | 0.19(4)                                                                       |          |
| Extinction coefficient            | n/a                                                                           |          |
| Largest diff. peak and hole       | 1.205 and -0.613 e.Å <sup>-3</sup>                                            |          |

**Table S3.** Atomic coordinates ( $\times 10^4$ ) and equivalent isotropic displacement parameters ( $\text{\AA}^2 \times 10^3$ ) for  $\text{Cu}_4@o\text{CBT}$ .  $U(\text{eq})$  is defined as one third of the trace of the orthogonalized  $U_{ij}$  tensor.

|       | x        | y        | z       | $U(\text{eq})$ |
|-------|----------|----------|---------|----------------|
| Cu(1) | 0        | 5122(1)  | 6667    | 52(1)          |
| Cu(2) | -61(1)   | 3393(1)  | 6038(1) | 48(1)          |
| Cu(3) | 0        | 1672(1)  | 6667    | 49(1)          |
| C(1)  | 5803(10) | 4668(11) | 6190(4) | 80(3)          |
| B(10) | 5052(13) | 3112(16) | 5973(6) | 89(4)          |
| C(3)  | 1629(11) | 8624(10) | 5026(3) | 73(3)          |
| C(4)  | 876(14)  | 8774(13) | 5462(4) | 90(4)          |
| B(1)  | 2607(9)  | 3069(9)  | 6067(3) | 40(2)          |
| B(2)  | 3475(10) | 4706(10) | 6300(3) | 50(2)          |
| B(3)  | 3353(11) | 3349(12) | 6610(3) | 57(2)          |
| B(4)  | 3485(11) | 2215(11) | 6228(4) | 60(3)          |
| B(5)  | 3661(12) | 2883(12) | 5667(4) | 62(3)          |
| B(6)  | 3662(11) | 4444(12) | 5715(3) | 58(3)          |
| B(7)  | 5193(13) | 4455(16) | 5670(5) | 84(4)          |
| B(8)  | 5082(12) | 5572(12) | 6048(5) | 68(3)          |
| B(9)  | 4887(12) | 4888(13) | 6585(5) | 72(3)          |
| C(2)  | 4867(12) | 3354(13) | 6528(5) | 92(4)          |
| B(11) | -65(10)  | 6043(10) | 5665(3) | 46(2)          |
| B(12) | -576(13) | 7240(13) | 5558(5) | 75(4)          |
| B(13) | -643(13) | 6166(14) | 5115(4) | 72(3)          |
| B(14) | 779(13)  | 5943(12) | 5176(4) | 62(3)          |
| B(15) | 1746(11) | 6913(10) | 5646(3) | 53(2)          |
| B(16) | 899(12)  | 7710(11) | 5891(4) | 62(3)          |
| B(17) | 2310(13) | 8637(13) | 5534(4) | 72(3)          |
| B(18) | 2160(13) | 7535(12) | 5102(3) | 65(3)          |
| B(19) | 803(15)  | 7101(15) | 4774(4) | 80(4)          |
| B(20) | -58(16)  | 7853(15) | 5001(5) | 87(4)          |
| S(1)  | -1112(2) | 4535(2)  | 6036(1) | 52(1)          |
| S(2)  | 725(2)   | 2030(2)  | 5972(1) | 49(1)          |

**Table S4.** Crystal data and structure refinement for [Cu<sub>4</sub>@mCBT].

|                                   |                                                                               |                |
|-----------------------------------|-------------------------------------------------------------------------------|----------------|
| Identification code               | Cu <sub>4</sub> @mCBT                                                         |                |
| Empirical formula                 | C <sub>8</sub> H <sub>44</sub> B <sub>40</sub> Cu <sub>4</sub> S <sub>4</sub> |                |
| Formula weight                    | 955.23                                                                        |                |
| Temperature                       | 296(2) K                                                                      |                |
| Wavelength                        | 0.71073 Å                                                                     |                |
| Crystal system                    | Monoclinic                                                                    |                |
| Space group                       | P2 <sub>1</sub> /c                                                            |                |
| Unit cell dimensions              | a = 11.3989(7) Å                                                              | α = 90°        |
|                                   | b = 11.9482(7) Å                                                              | β = 91.213(2)° |
|                                   | c = 32.3144(19) Å                                                             | γ = 90°        |
| Volume                            | 4400.1(5) Å <sup>3</sup>                                                      |                |
| Z                                 | 4                                                                             |                |
| Density (calculated)              | 1.442 Mg/m <sup>3</sup>                                                       |                |
| Absorption coefficient            | 2.112 mm <sup>-1</sup>                                                        |                |
| F(000)                            | 1888                                                                          |                |
| Crystal size                      | 0.200 x 0.200 x 0.150 mm <sup>3</sup>                                         |                |
| Theta range for data collection   | 3.044 to 23.439°.                                                             |                |
| Index ranges                      | -12 ≤ h ≤ 12, -13 ≤ k ≤ 13, -36 ≤ l ≤ 36                                      |                |
| Reflections collected             | 54022                                                                         |                |
| Independent reflections           | 6415 [R(int) = 0.1819]                                                        |                |
| Completeness to theta = 23.439°   | 99.2 %                                                                        |                |
| Absorption correction             | Semi-empirical from equivalents                                               |                |
| Max. and min. transmission        | 0.7456 and 0.5645                                                             |                |
| Refinement method                 | Full-matrix least-squares on F <sup>2</sup>                                   |                |
| Data / restraints / parameters    | 6415 / 298 / 505                                                              |                |
| Goodness-of-fit on F <sup>2</sup> | 1.116                                                                         |                |
| Final R indices [I > 2σ(I)]       | R1 = 0.0986, wR2 = 0.1819                                                     |                |
| R indices (all data)              | R1 = 0.1808, wR2 = 0.2141                                                     |                |
| Extinction coefficient            | n/a                                                                           |                |
| Largest diff. peak and hole       | 0.484 and -0.429 e.Å <sup>-3</sup>                                            |                |



**Table S5.** Atomic coordinates ( $\times 10^4$ ) and equivalent isotropic displacement parameters ( $\text{\AA}^2 \times 10^3$ ) for  $\text{Cu}_4\text{@mCBT}$ .  $U(\text{eq})$  is defined as one third of the trace of the orthogonalized  $U^{ij}$  tensor.

|       | x        | y        | z       | $U(\text{eq})$ |
|-------|----------|----------|---------|----------------|
| Cu(1) | 7455(2)  | 5278(1)  | 6964(1) | 92(1)          |
| Cu(2) | 5347(1)  | 4301(1)  | 6816(1) | 75(1)          |
| Cu(3) | 6138(2)  | 3468(1)  | 6103(1) | 75(1)          |
| Cu(4) | 8236(1)  | 4472(1)  | 6211(1) | 76(1)          |
| B(7)  | 8429(14) | 850(14)  | 7774(6) | 82(4)          |
| C(2)  | 8369(14) | 1984(13) | 8096(5) | 102(4)         |
| B(14) | 6656(18) | 9473(15) | 5913(7) | 110(5)         |
| C(4)  | 6700(18) | 8215(14) | 5648(6) | 130(5)         |
| C(6)  | 7110(30) | 2216(19) | 4596(7) | 183(8)         |
| B(21) | 7530(20) | 3420(20) | 4342(7) | 152(7)         |
| C(7)  | 2472(18) | 1206(16) | 6679(6) | 137(6)         |
| B(35) | 1466(16) | 902(16)  | 6330(7) | 103(5)         |
| B(1)  | 7058(15) | 2683(15) | 8023(5) | 84(4)          |
| B(2)  | 8360(13) | 3199(14) | 7808(5) | 75(3)          |
| B(3)  | 9108(13) | 2043(12) | 7662(6) | 75(4)          |
| B(4)  | 7148(14) | 869(14)  | 7476(5) | 76(3)          |
| B(5)  | 7154(15) | 1258(14) | 7976(6) | 82(4)          |
| B(6)  | 8383(14) | 2796(13) | 7290(5) | 73(3)          |
| C(1)  | 8424(13) | 1325(11) | 7271(5) | 87(3)          |
| B(8)  | 6300(15) | 1960(13) | 7631(5) | 79(3)          |
| B(9)  | 7035(13) | 3213(12) | 7511(5) | 64(3)          |
| B(10) | 7093(14) | 2048(13) | 7173(5) | 72(3)          |
| B(11) | 6674(15) | 7103(14) | 5992(6) | 96(4)          |
| B(12) | 8000(19) | 7507(17) | 5788(7) | 115(5)         |
| B(13) | 7960(20) | 8964(19) | 5743(9) | 145(6)         |
| B(17) | 6610(20) | 9113(18) | 6421(7) | 127(5)         |
| B(15) | 5908(16) | 8331(14) | 6061(7) | 101(5)         |
| B(16) | 8743(17) | 8365(16) | 6155(9) | 133(6)         |
| C(3)  | 7846(17) | 9476(13) | 6219(7) | 144(6)         |
| B(18) | 6582(15) | 7679(17) | 6472(7) | 102(4)         |
| B(19) | 7913(12) | 7203(12) | 6306(6) | 74(3)          |

|       |          |          |          |         |
|-------|----------|----------|----------|---------|
| B(20) | 7860(20) | 8449(16) | 6585(8)  | 123(5)  |
| C(5)  | 8639(18) | 3890(30) | 4622(7)  | 188(8)  |
| B(22) | 8978(18) | 3120(30) | 5049(7)  | 167(8)  |
| B(23) | 8000(20) | 2020(20) | 5034(6)  | 141(6)  |
| B(24) | 6380(20) | 3341(19) | 4636(6)  | 115(5)  |
| B(25) | 8540(30) | 2480(40) | 4588(8)  | 214(10) |
| B(26) | 8100(20) | 4340(20) | 5117(7)  | 133(6)  |
| B(27) | 7238(17) | 4371(18) | 4682(5)  | 97(4)   |
| B(28) | 6609(19) | 2493(18) | 5073(7)  | 113(5)  |
| B(29) | 7784(13) | 3082(12) | 5372(5)  | 63(3)   |
| B(30) | 6684(16) | 3900(16) | 5109(5)  | 91(4)   |
| B(31) | 2390(18) | 2643(16) | 5868(6)  | 106(5)  |
| B(32) | 3506(18) | 1738(16) | 5958(7)  | 112(5)  |
| B(33) | 2923(18) | 647(15)  | 6233(9)  | 131(6)  |
| C(8)  | 2005(18) | 1287(15) | 5865(6)  | 130(5)  |
| B(34) | 1203(17) | 2132(17) | 6120(10) | 130(6)  |
| B(36) | 1929(15) | 3192(16) | 6299(8)  | 120(5)  |
| B(37) | 3749(17) | 1685(17) | 6485(8)  | 126(6)  |
| B(38) | 3415(12) | 2972(12) | 6263(5)  | 61(3)   |
| B(39) | 2750(20) | 2580(20) | 6709(6)  | 132(6)  |
| B(40) | 1330(20) | 2090(20) | 6574(10) | 154(7)  |
| S(1)  | 6254(4)  | 4557(3)  | 7402(1)  | 87(1)   |
| S(2)  | 4434(3)  | 4195(3)  | 6223(1)  | 76(1)   |
| S(3)  | 7865(3)  | 2849(3)  | 5941(1)  | 70(1)   |
| S(4)  | 8729(3)  | 5962(3)  | 6549(2)  | 98(1)   |

**Table S6.** Crystal data and structure refinement for [Cu<sub>4</sub>@ICBT].

|                                   |                                                                                              |               |
|-----------------------------------|----------------------------------------------------------------------------------------------|---------------|
| Identification code               | Cu <sub>4</sub> @ICBT                                                                        |               |
| Empirical formula                 | C <sub>8</sub> H <sub>41</sub> B <sub>40</sub> Cu <sub>4</sub> I <sub>3</sub> S <sub>4</sub> |               |
| Formula weight                    | 1332.91                                                                                      |               |
| Temperature                       | 200(2) K                                                                                     |               |
| Wavelength                        | 0.71073 Å                                                                                    |               |
| Crystal system                    | Tetragonal                                                                                   |               |
| Space group                       | P4 <sub>3</sub> 2 <sub>1</sub> 2                                                             |               |
| Unit cell dimensions              | a = 12.716(3) Å                                                                              | α = 90.00(3)° |
|                                   | b = 12.716(3) Å                                                                              | β = 90.00(3)° |
|                                   | c = 39.812(8) Å                                                                              | γ = 90.00(3)° |
| Volume                            | 6438(3) Å <sup>3</sup>                                                                       |               |
| Z                                 | 4                                                                                            |               |
| Density (calculated)              | 1.375 Mg/m <sup>3</sup>                                                                      |               |
| Absorption coefficient            | 2.884 mm <sup>-1</sup>                                                                       |               |
| F(000)                            | 2512                                                                                         |               |
| Crystal size                      | 0.200 x 0.150 x 0.120 mm <sup>3</sup>                                                        |               |
| Theta range for data collection   | 3.018 to 19.992°.                                                                            |               |
| Index ranges                      | -12 ≤ h ≤ 12, -12 ≤ k ≤ 12, -38 ≤ l ≤ 38                                                     |               |
| Reflections collected             | 33001                                                                                        |               |
| Independent reflections           | 2991 [R(int) = 0.0566]                                                                       |               |
| Completeness to theta = 19.992°   | 99.3 %                                                                                       |               |
| Absorption correction             | Semi-empirical from equivalents                                                              |               |
| Max. and min. transmission        | 0.5610 and 0.3783                                                                            |               |
| Refinement method                 | Full-matrix least-squares on F <sup>2</sup>                                                  |               |
| Data / restraints / parameters    | 2991 / 578 / 273                                                                             |               |
| Goodness-of-fit on F <sup>2</sup> | 1.082                                                                                        |               |
| Final R indices [I > 2σ(I)]       | R1 = 0.1061, wR2 = 0.2772                                                                    |               |
| R indices (all data)              | R1 = 0.1123, wR2 = 0.2841                                                                    |               |
| Absolute structure parameter      | 0.29(16)                                                                                     |               |
| Extinction coefficient            | n/a                                                                                          |               |
| Largest diff. peak and hole       | 1.252 and -0.727 e.Å <sup>-3</sup>                                                           |               |

**Table S7.** Atomic coordinates ( $\times 10^4$ ) and equivalent isotropic displacement parameters ( $\text{\AA}^2 \times 10^3$ ) for  $\text{Cu}_4\text{@ICBT}$ .  $U(\text{eq})$  is defined as one third of the trace of the orthogonalized  $U^{ij}$  tensor.

|       | x        | y        | z        | $U(\text{eq})$ |
|-------|----------|----------|----------|----------------|
| Cu(1) | 1638(4)  | 8362(4)  | 7500     | 114(3)         |
| Cu(2) | 1800(5)  | 6377(4)  | 7173(1)  | 111(2)         |
| Cu(3) | 3742(4)  | 6258(4)  | 7500     | 106(2)         |
| I(1)  | 3120(2)  | 8882(2)  | 6837(1)  | 101(1)         |
| I(2)  | 849(6)   | 4473(5)  | 7562(2)  | 141(3)         |
| S(1)  | 515(9)   | 7496(11) | 7194(2)  | 115(3)         |
| S(2)  | 3225(10) | 5565(9)  | 7028(2)  | 108(3)         |
| B(1)  | -590(20) | 8660(30) | 6617(7)  | 120(6)         |
| B(2)  | 480(20)  | 9460(30) | 6707(7)  | 121(6)         |
| C(1)  | -630(20) | 8470(20) | 6193(6)  | 124(6)         |
| C(2)  | 390(20)  | 9130(20) | 6030(7)  | 125(6)         |
| B(3)  | 1530(20) | 8580(30) | 6153(7)  | 115(6)         |
| B(4)  | 1160(20) | 7570(20) | 6420(6)  | 111(6)         |
| B(5)  | -160(20) | 7490(30) | 6442(7)  | 118(6)         |
| B(6)  | 460(20)  | 7780(20) | 6062(7)  | 119(6)         |
| B(7)  | -270(20) | 9680(20) | 6354(7)  | 125(6)         |
| B(8)  | 1100(20) | 9760(20) | 6329(7)  | 122(6)         |
| B(9)  | 1550(20) | 8760(30) | 6576(7)  | 115(6)         |
| B(10) | 520(20)  | 8100(30) | 6763(6)  | 114(6)         |
| B(13) | 3170(30) | 4120(20) | 7168(9)  | 158(7)         |
| B(14) | 3370(40) | 3670(30) | 7569(9)  | 163(7)         |
| B(11) | 2340(30) | 3240(30) | 6965(9)  | 165(7)         |
| B(12) | 3670(30) | 3180(30) | 6895(9)  | 170(8)         |
| C(3)  | 4170(30) | 2180(30) | 7134(9)  | 177(8)         |
| C(4)  | 3160(30) | 1630(20) | 7351(9)  | 177(8)         |
| B(15) | 2010(30) | 2250(30) | 7252(10) | 171(8)         |
| B(16) | 2950(40) | 2040(30) | 6947(9)  | 174(8)         |
| B(17) | 4320(30) | 3450(30) | 7267(10) | 169(8)         |
| B(18) | 3990(30) | 2470(30) | 7553(9)  | 174(8)         |
| B(19) | 2660(30) | 2530(30) | 7623(9)  | 173(8)         |
| B(20) | 2150(30) | 3540(30) | 7386(9)  | 165(7)         |

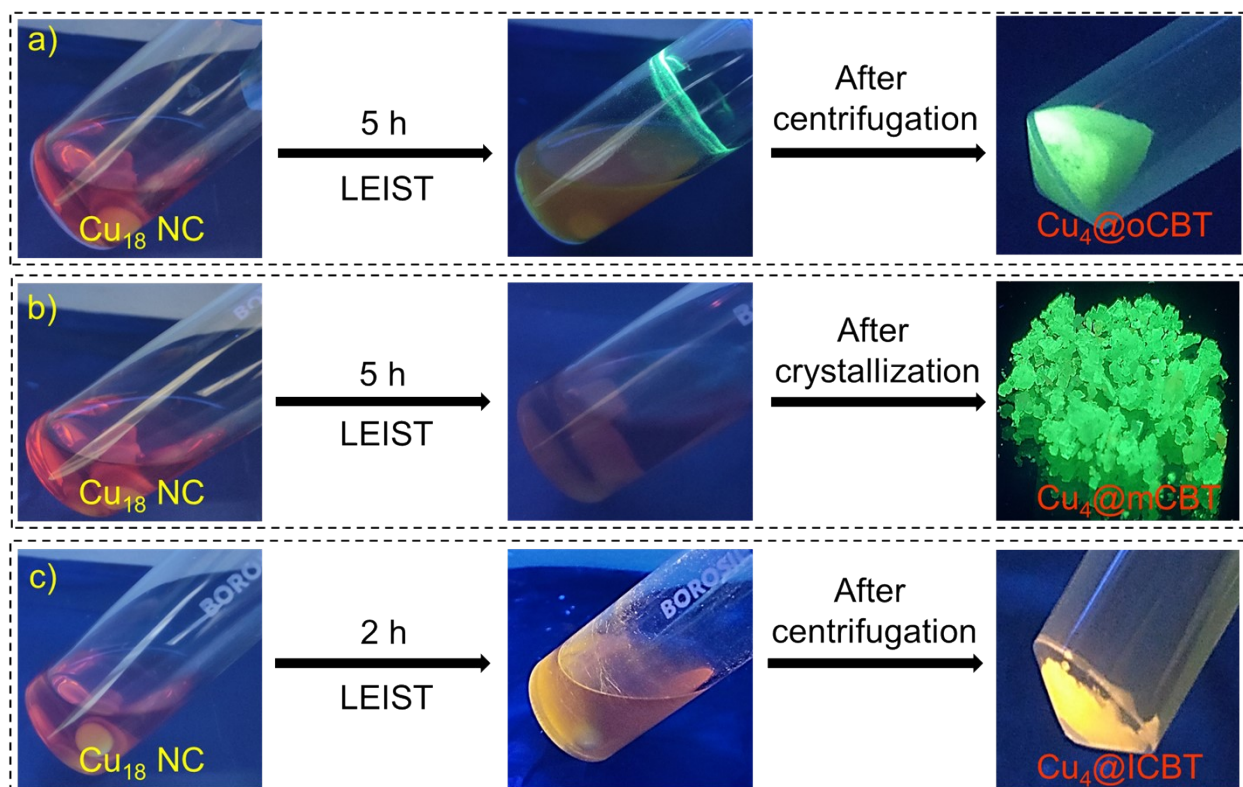

**Fig. S1** Photographic images of the different steps of synthesis and purification of a)  $\text{Cu}_4@o\text{CBT}$ , b)  $\text{Cu}_4@m\text{CBT}$  and c)  $\text{Cu}_4@i\text{CBT}$ , starting from  $\text{Cu}_{18}$ . All of the images were taken under 365 nm UV light.

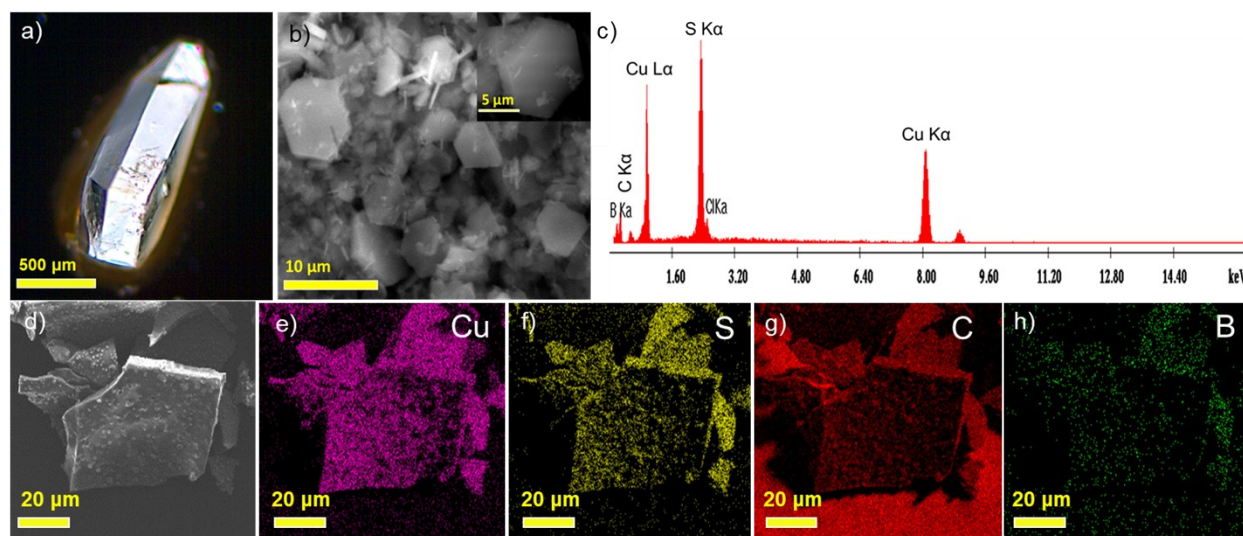

**Fig. S2** a) Optical microscopic image of  $\text{Cu}_4@o\text{CBT}$  single crystals, b) Large area SEM images of crystals (inset shows magnified image of a single crystal), c) The EDS spectrum of the  $\text{Cu}_4@o\text{CBT}$  crystals, d-h) the elemental mapping of respective elements present in crystal.



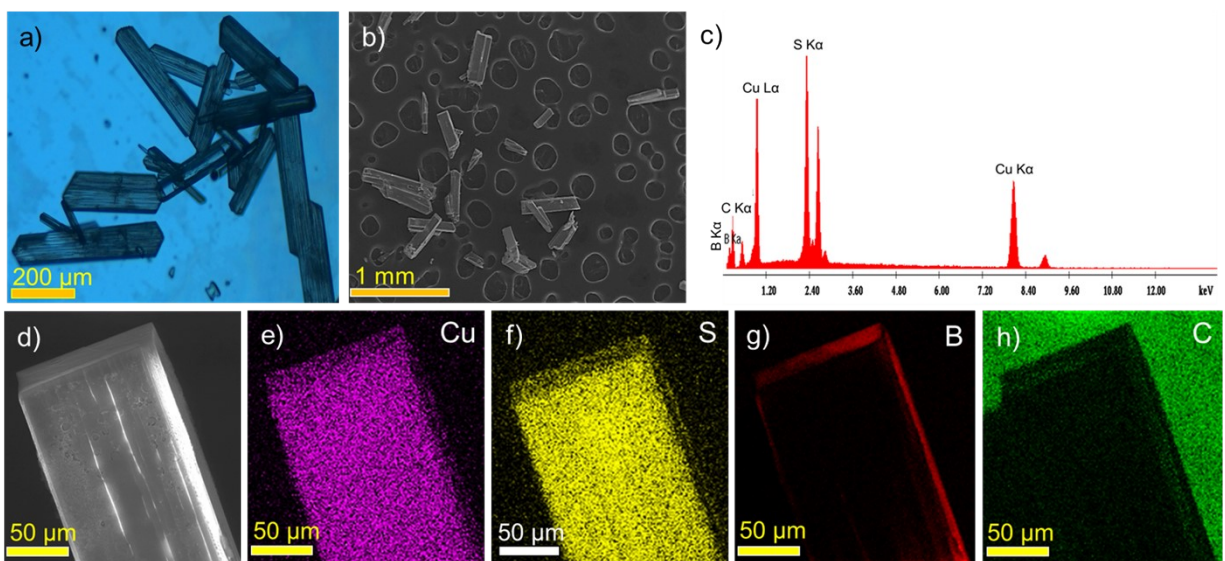

**Fig. S3** a) Optical microscopic image of cuboid crystals of  $\text{Cu}_4@m\text{CBT}$ . b) Large area SEM image of same crystals. c) The EDS spectrum of the crystals have respective elements. d-h) Elemental mapping of the crystal with corresponding elements.

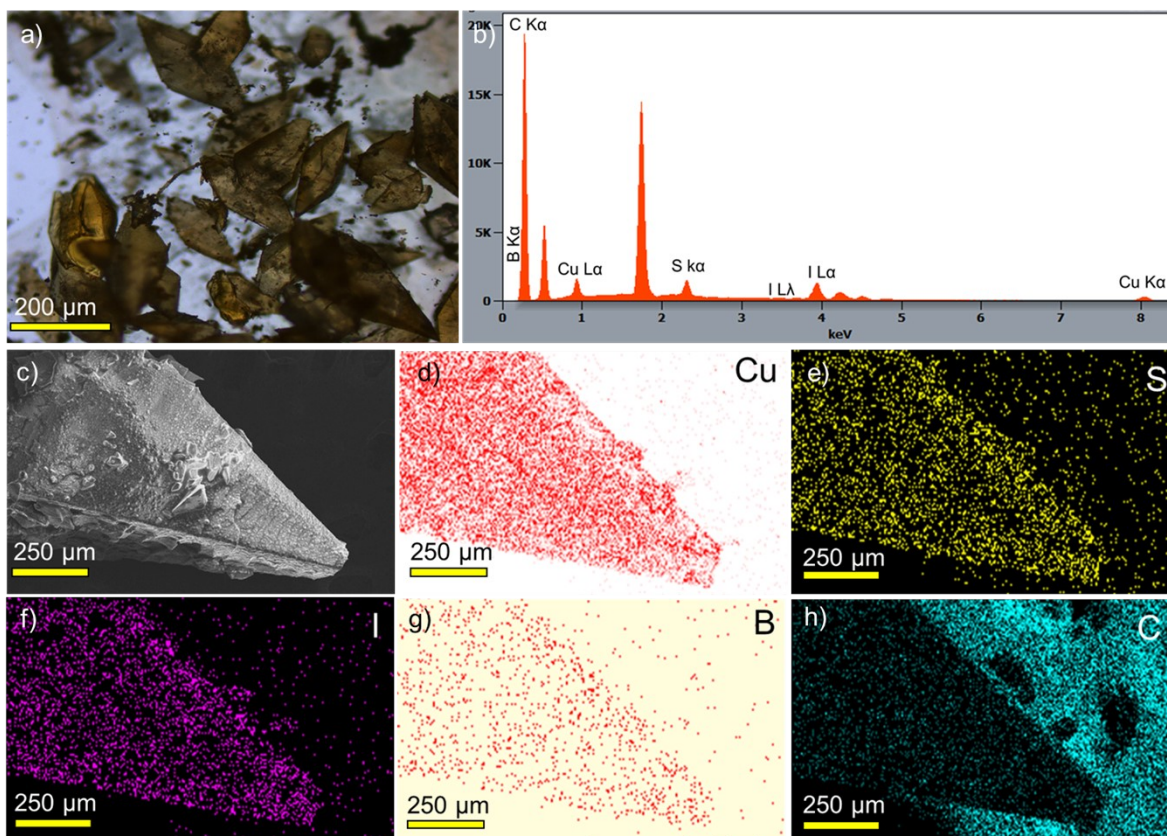

**Fig. S4** a) Optical microscopic image of rhombus crystals of  $\text{Cu}_4@i\text{CBT}$ . b) Large area SEM images for the same crystals. c) The EDS spectrum for the  $\text{Cu}_4@m\text{CBT}$  crystal. d-h) Elemental mapping of the crystal with corresponding its assigned elements.

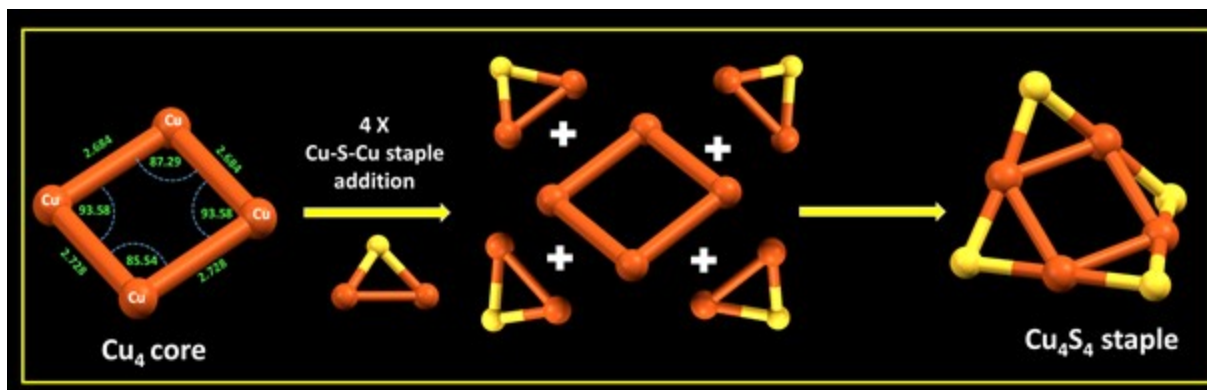

**Fig. S5** Structural anatomy of  $\text{Cu}_4\text{S}_4$  kernel having a square planar  $\text{Cu}_4$  with four 'V-shaped'  $\text{Cu-S-Cu}$  motifs.

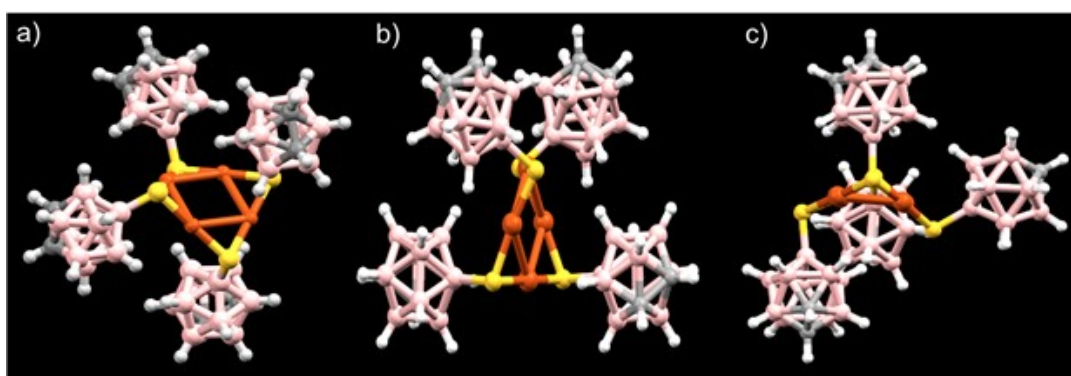

**Fig. S6** a-c) Structures of  $\text{Cu}_4@o\text{CBT}$  in three different orientations showed anti orientation of *ortho*-carborane ligands present in the opposite corner of the cluster.

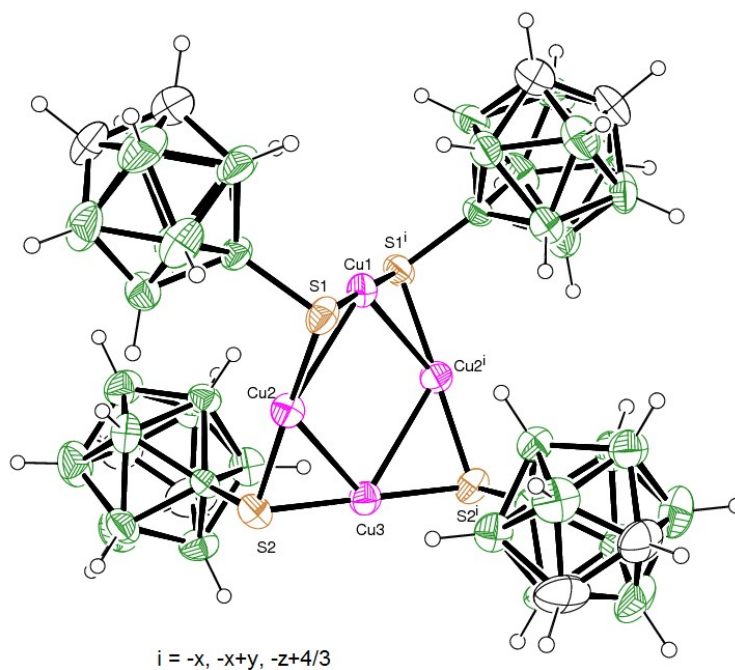

**Fig. S7** ORTEP structure of  $\text{Cu}_4@o\text{CBT}$  having 50% thermal ellipsoid probability.



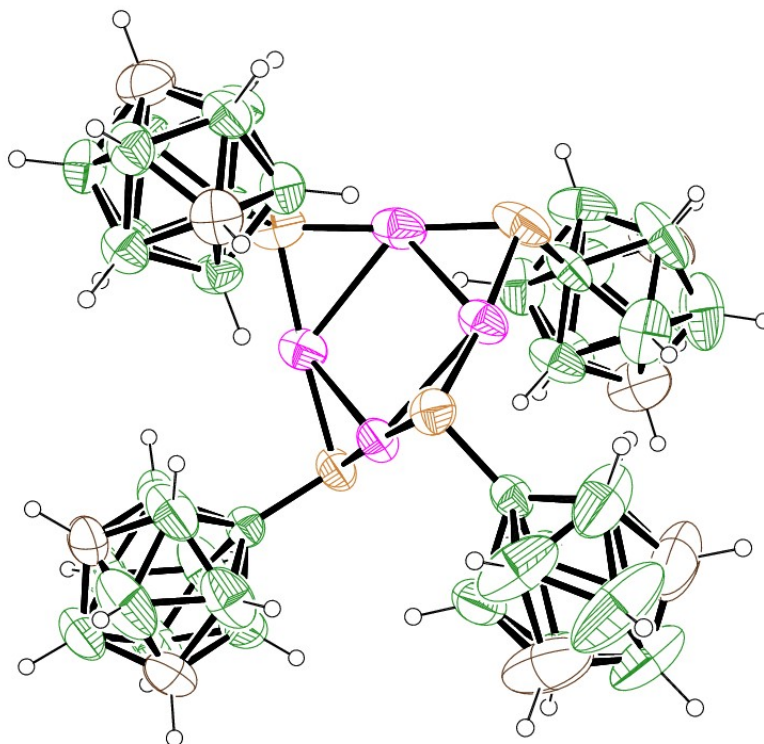

**Fig. S8** ORTEP structure of Cu<sub>4</sub>@mCBT having 50% thermal ellipsoid probability.

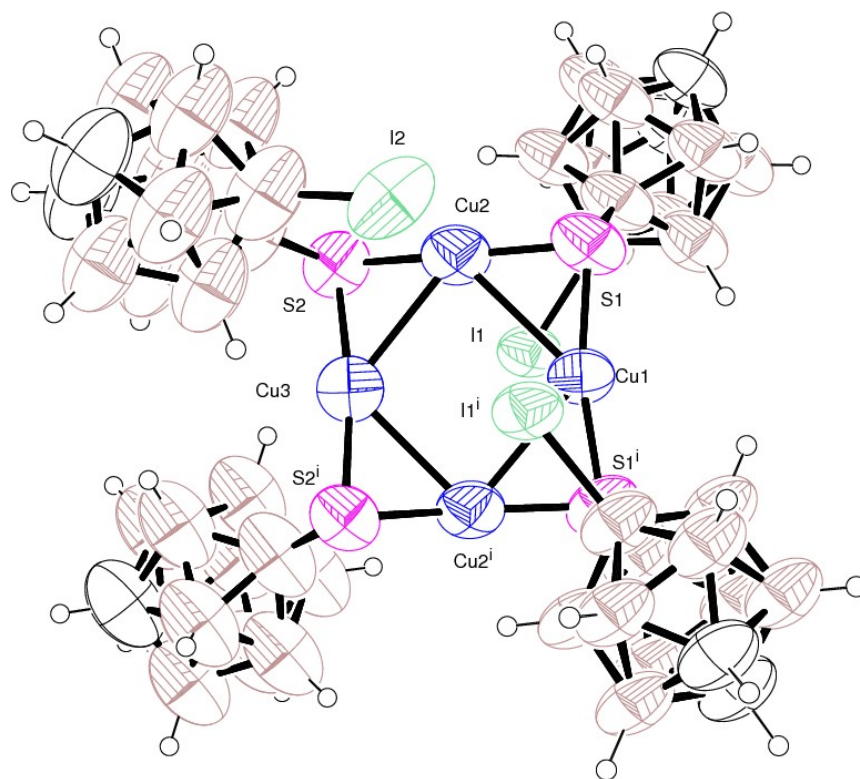

**Fig. S9** ORTEP image of Cu<sub>4</sub>@ICBT having 50 % thermal ellipsoid probability.



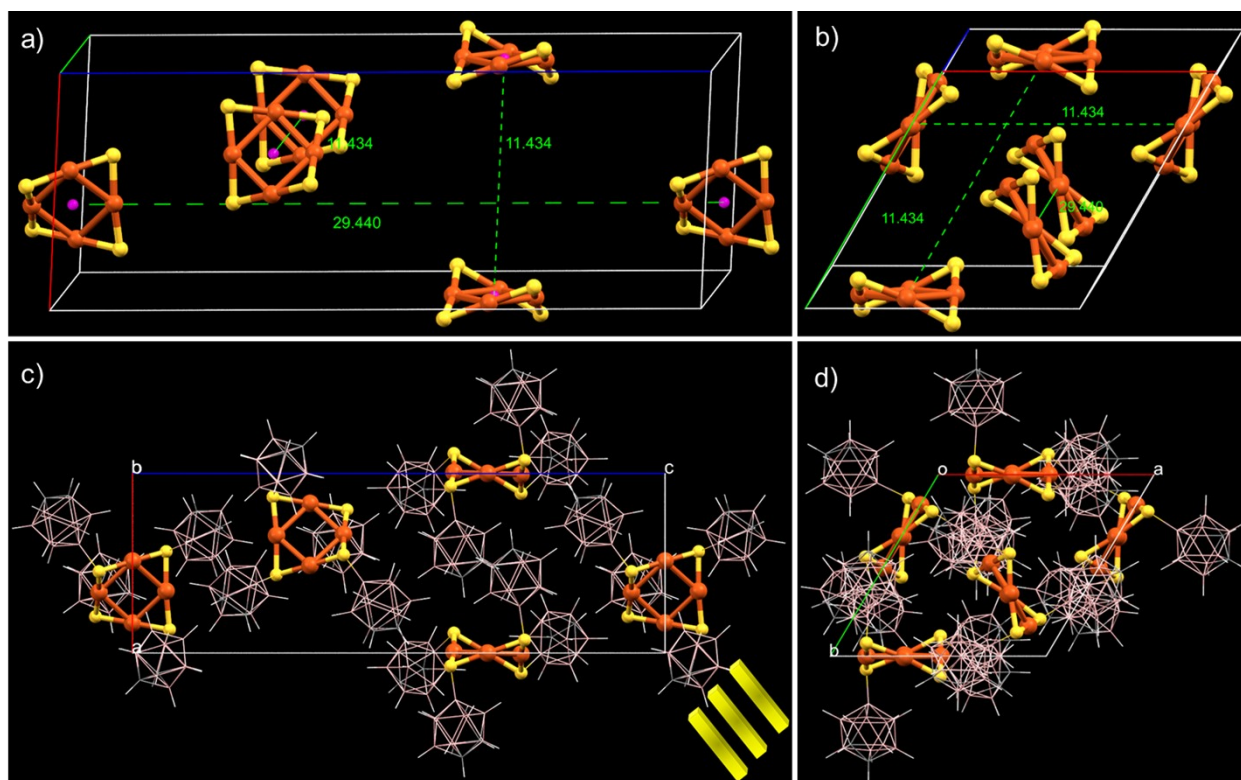

**Fig. S10** Unit cell packing of  $\text{Cu}_4\text{S}_4$  unit of  $\text{Cu}_4@o\text{CBT}$  viewed from a) b and b) c crystallographic axis. The distances between opposite  $\text{Cu}_4\text{S}_4$  centroids are marked here. Unit cell molecular packing along c) b and d) c crystallographic axis.

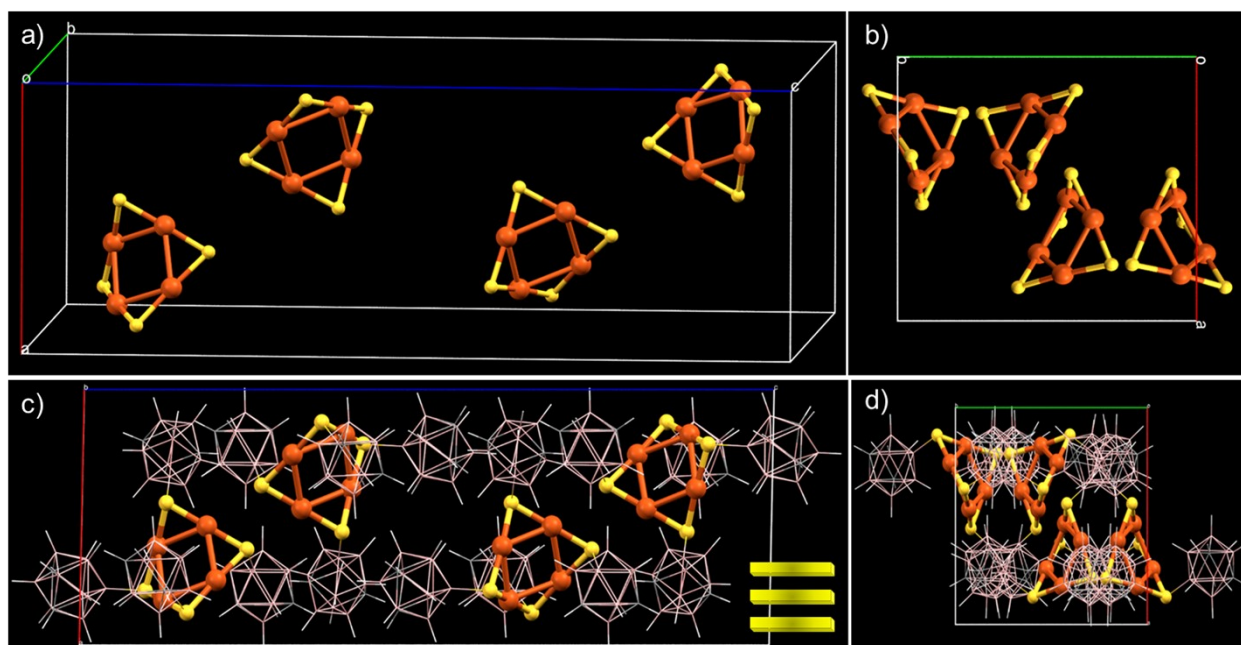

**Fig. S11** Unit cell packing of  $\text{Cu}_4\text{S}_4$  unit of  $\text{Cu}_4@m\text{CBT}$  viewed from a) b and b) c crystallographic axis. Unit cell molecular packing viewed from c) b and d) c crystallographic axis.

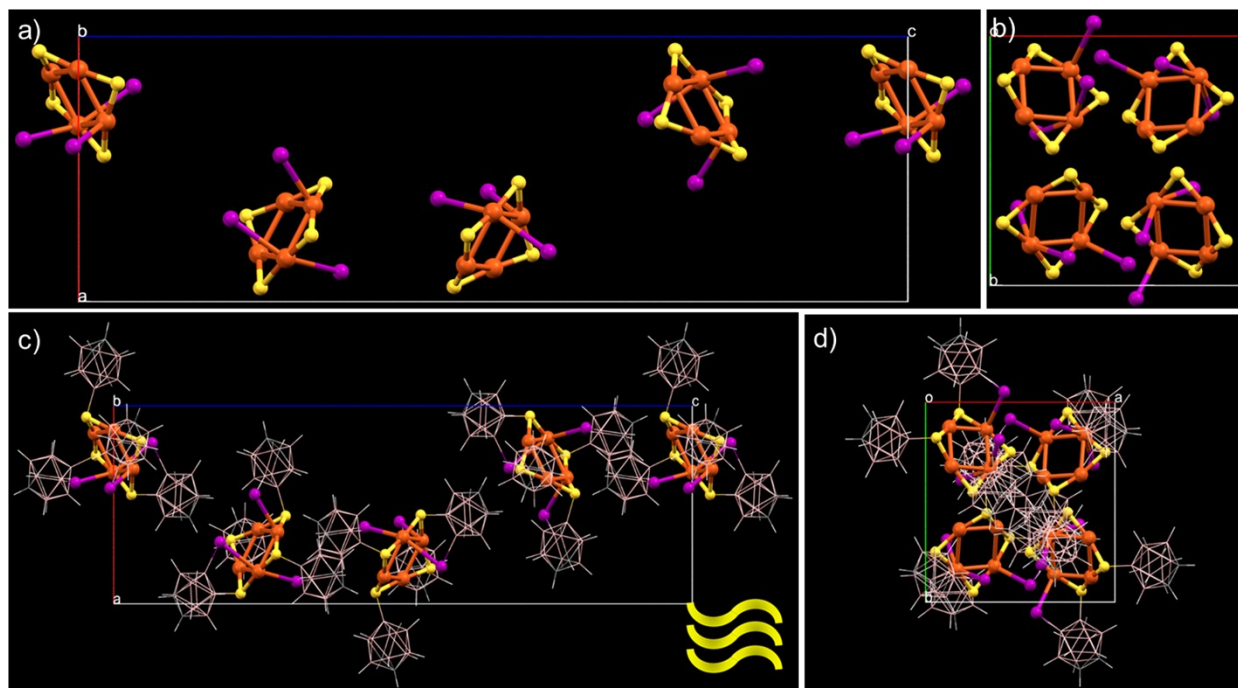

**Fig. S12** Unit cell packing of  $\text{Cu}_4\text{S}_4$  unit of  $\text{Cu}_4@ICBT$  viewed from a) b and b) c crystallographic axis. Unit cell molecular packing viewed from c) b and d) c crystallographic axis.

**Table S8.** Comparative interatomic bond distances and bond angles of the respective  $\text{Cu}_4$  clusters.

| Sl. No | Contents                         | $\text{Cu}_4@oCBT$             | $\text{Cu}_4@mCBT$             | $\text{Cu}_4@ICBT$             |
|--------|----------------------------------|--------------------------------|--------------------------------|--------------------------------|
| 1.     | Cu-Cu bond distance              | 2.68 Å, 2.68 Å, 2.73 Å, 2.73 Å | 2.68 Å, 2.71 Å, 2.78 Å, 2.70 Å | 2.85 Å, 2.85 Å, 2.80 Å, 2.80 Å |
| 2.     | Cu-Cu-Cu bond angle              | 87.29°, 93.58°, 93.58°, 85.54° | 89.75°, 89.91°, 88.17°, 92.11° | 84.18°, 94.66°, 96.99°, 84.18° |
| 3.     | Cu-S-Cu bond angle               | 76.58°, 76.58°, 78.13°, 78.13° | 76.48°, 76.62°, 80.20°, 77.29° | 80.22°, 80.22°, 81.93°, 81.93° |
| 4.     | Opposite S-S distance            | 5.54 Å, 5.54 Å                 | 5.42 Å, 5.49 Å                 | 5.94 Å, 5.94 Å                 |
| 5.     | CB B-S distance                  | 1.88 Å, 1.88 Å, 1.89 Å, 1.89 Å | 1.86 Å, 1.91 Å, 1.87 Å, 1.87 Å | 1.88 Å, 1.88 Å, 1.92 Å, 1.92 Å |
| 6.     | CB-CB centroid distance          | 7.37 Å, 8.22 Å, 7.37 Å, 9.23 Å | 7.54 Å, 7.91 Å, 7.46 Å, 9.24 Å | 9.37 Å, 9.06 Å, 7.56 Å, 9.06 Å |
| 7.     | Opposite CB-CB centroid distance | 9.73 Å, 9.73 Å                 | 9.3 Å, 9.64 Å                  | 10.59 Å, 10.59 Å               |

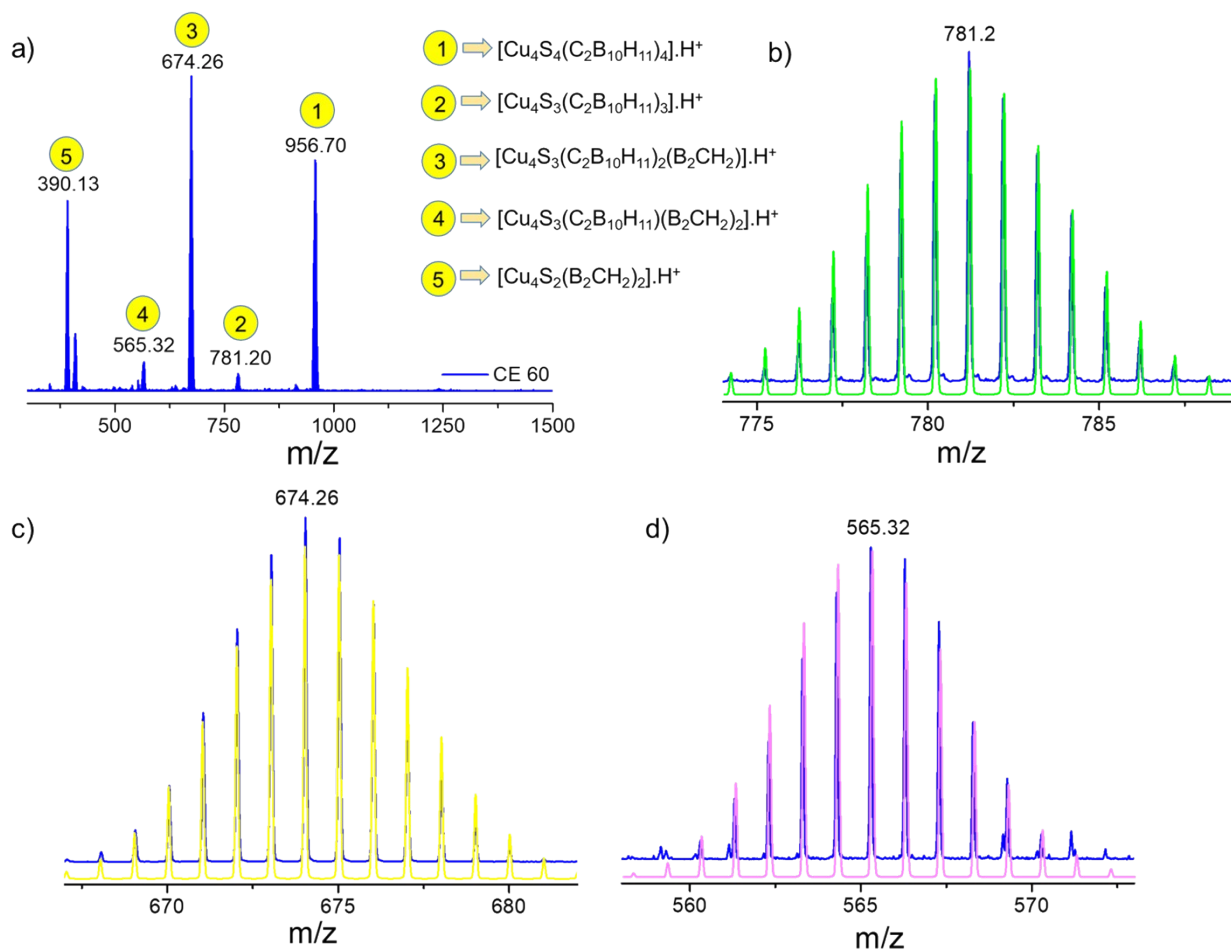

**Fig. S13** a) The MS/MS fragmentation pattern of  $\text{Cu}_4\text{@oCBT}$  at CE 60. Experimental isotopic distribution patterns of the fragments were matches with theoretical distribution of b) 781.20, c) 674.26 and d) 565.32 peaks, respectively.

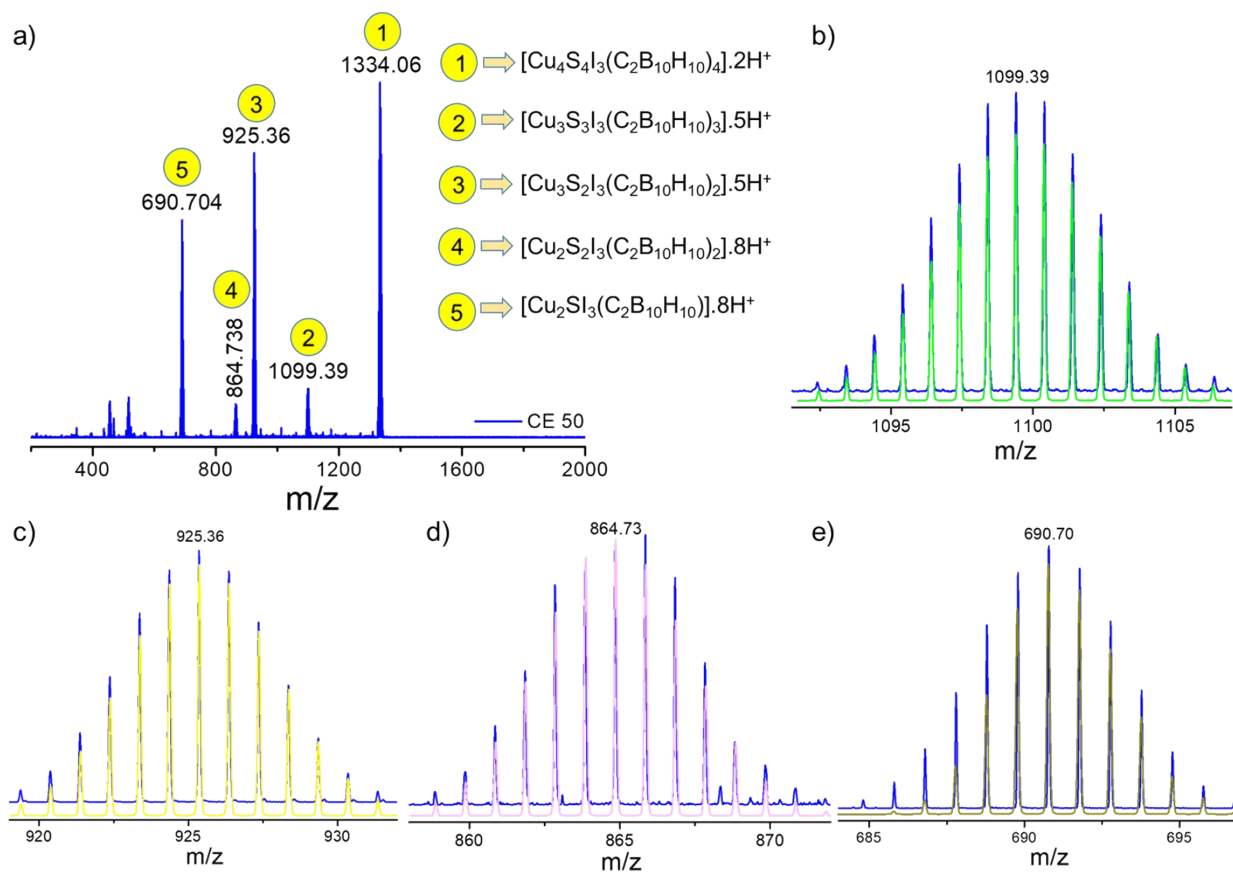

**Fig. S14** a) The MS/MS fragmentation pattern of  $\text{Cu}_4\text{@ICBT}$  at CE 50. Experimental isotopic distribution patterns of the fragments were matches well with theoretical distribution of b) 1099.39, c) 925.36, d) 864.73 and e) 690.70 peaks, respectively.

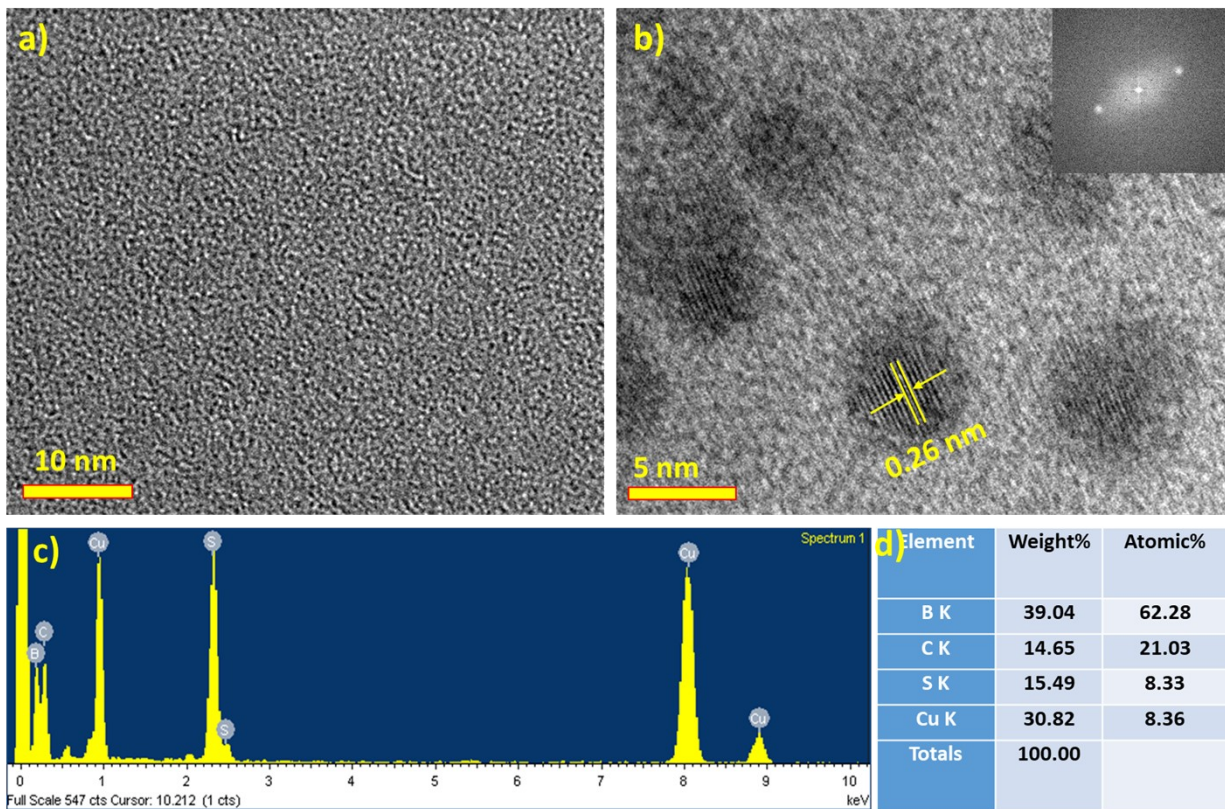

**Fig. S15** a) Large area TEM micrograph of  $\text{Cu}_4@o\text{CBT}$  after 2 min beam exposure, b) HRTEM image after 15 min beam exposure shows the formation of lattice with spacing of 0.26 nm (inset shows the diffraction spots), c) EDS spectral profile of the cluster, d) elemental assignments of the cluster.



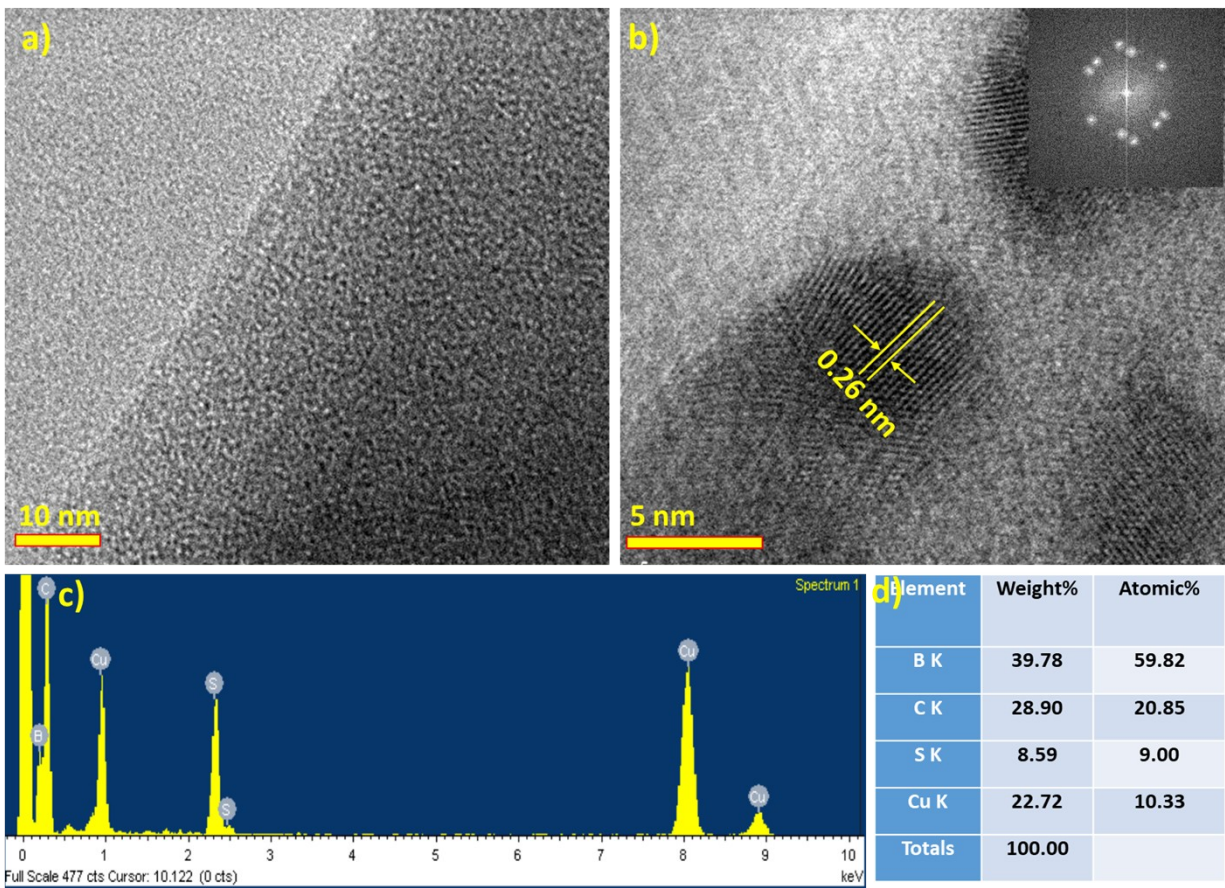

**Fig. S16** a) Large area TEM micrograph of the Cu<sub>4</sub>@mCBT after 2 min beam exposure. b) HRTEM image of the NC after 15 min beam exposure shows the formation of lattice with lattice spacing 0.26 nm ((inset shows the diffraction spots), c) EDS spectral profile of the cluster, d) elemental assignments of the cluster.

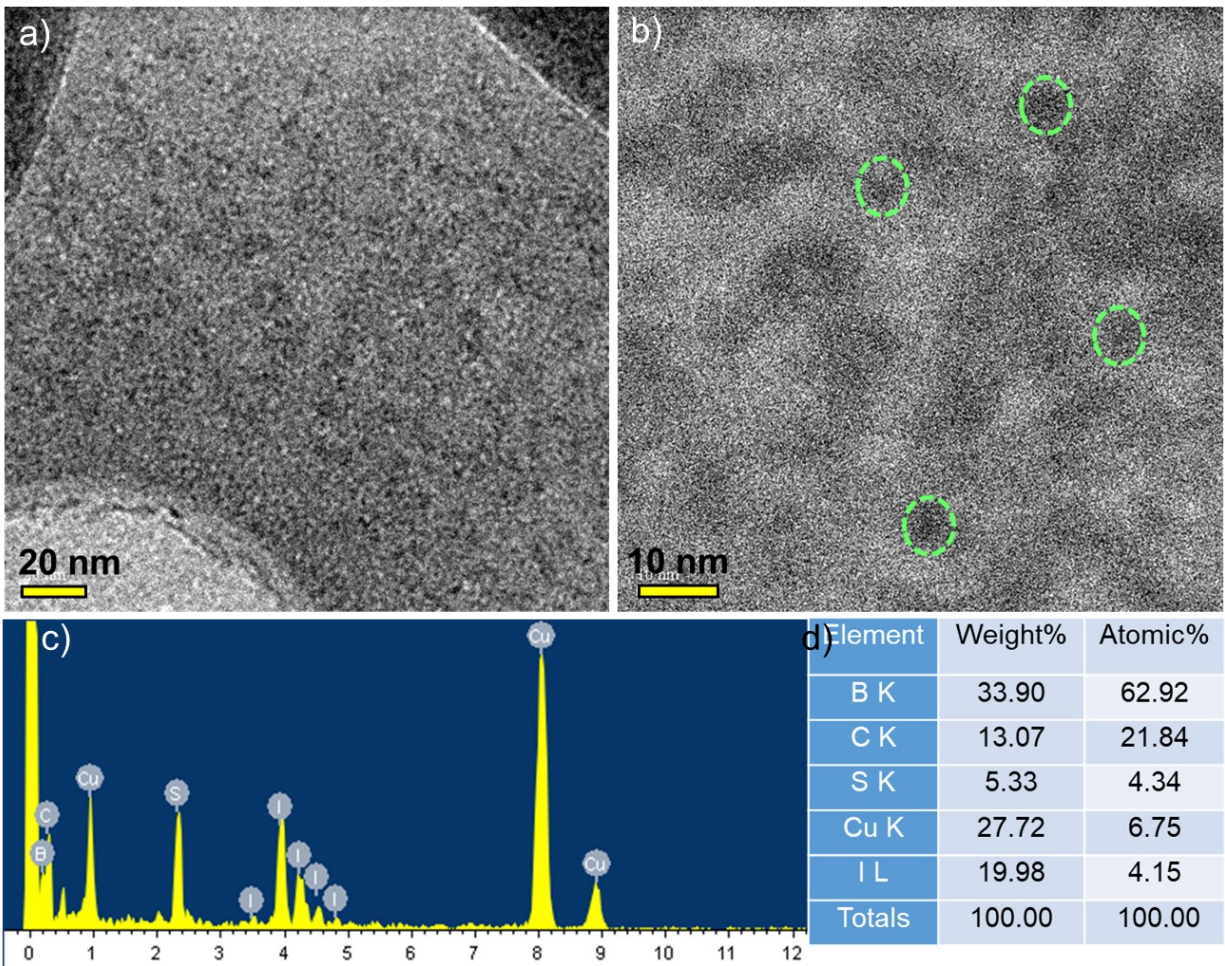

**Fig. S17** a) Large area TEM micrograph of the  $\text{Cu}_4\text{@ICBT}$  after 2 min beam exposure. b) HRTEM image of the NC after 5 min beam exposure shows the formation of larger particles, c) EDS spectral profile of the cluster, d) elemental assignments of the cluster.

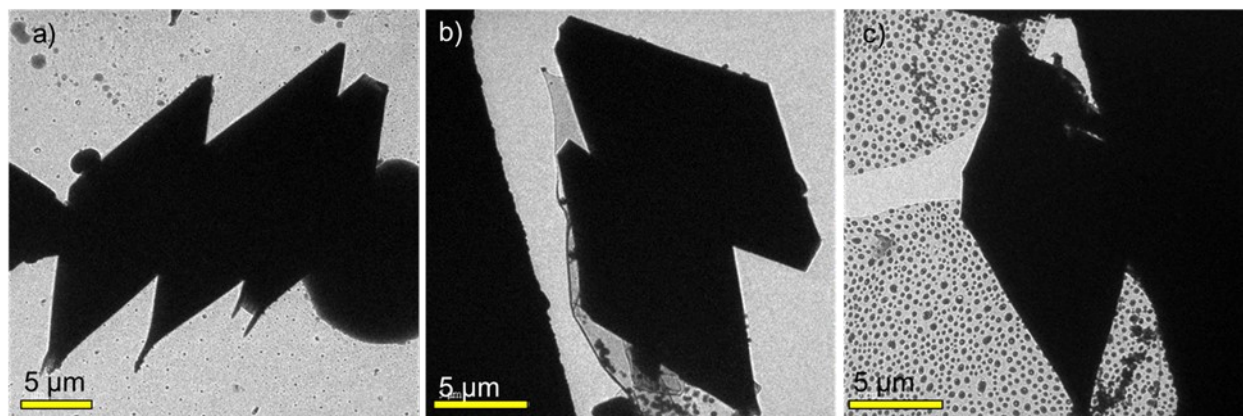

**Fig. S18** TEM micrographs of  $\text{Cu}_4\text{@ICBT}$  microcrystals indicate their rhombohedral nature. Diluted cluster leads to the fast formation of microcrystalline materials.

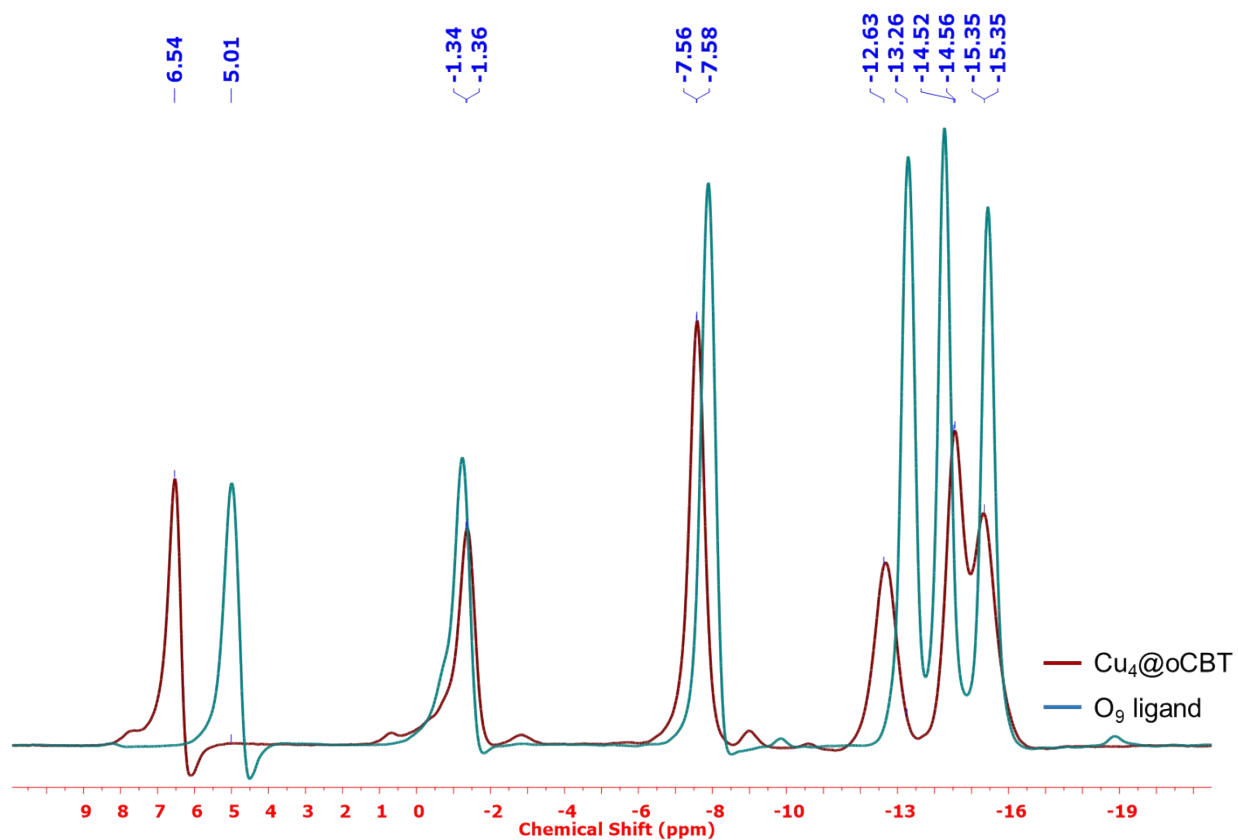

**Fig. S19** Combined  $^{11}\text{B}\{^1\text{H}\}$  NMR spectra of  $\text{Cu}_4@o\text{CBT}$  and  $\text{O}_9$  ligand.

**Table S9.**  $^{11}\text{B}\{^1\text{H}\}$  NMR chemical shift data for  $\text{Cu}_4@o\text{CBT}$  and  $\text{O}_9$  ligand.

| Chemical shift (ppm) of $\text{Cu}_4@o\text{CBT}$ | Intensity ratio |
|---------------------------------------------------|-----------------|
| 6.54, -1.36, -7.56, -12.63, -14.56, -15.35        | (1:1:2:1:3:2)   |
| Chemical shift (ppm) of $\text{O}_9$ ligand       |                 |
| 5.01, -1.34, -7.58, -13.26, -14.52, -15.35        | (1:1:2:2:2:2)   |



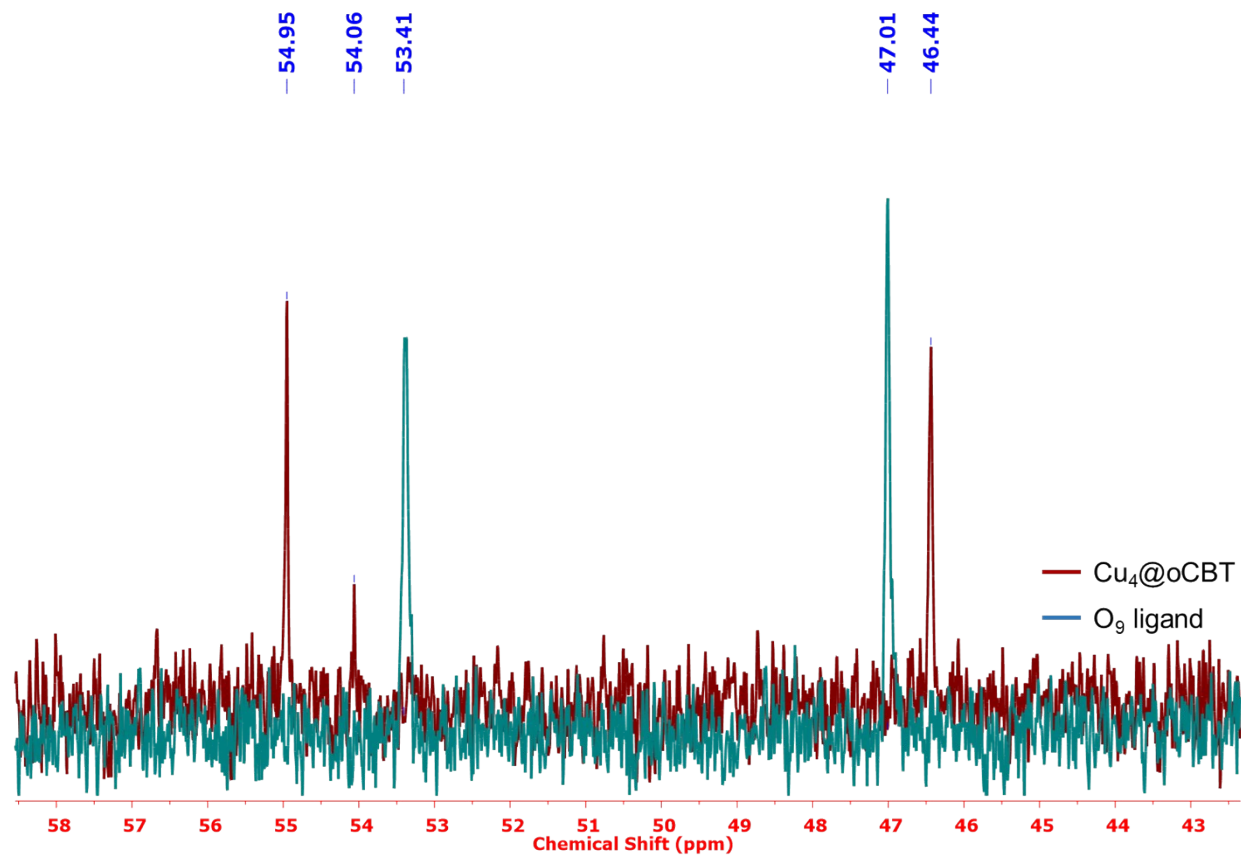

**Fig. S20** Combined  $^{13}\text{C}\{^1\text{H}\}$  NMR spectra of  $\text{Cu}_4@o\text{CBT}$  and  $\text{O}_9$  ligand.  $\delta = 54.06$  ppm is due to solvent impurity.

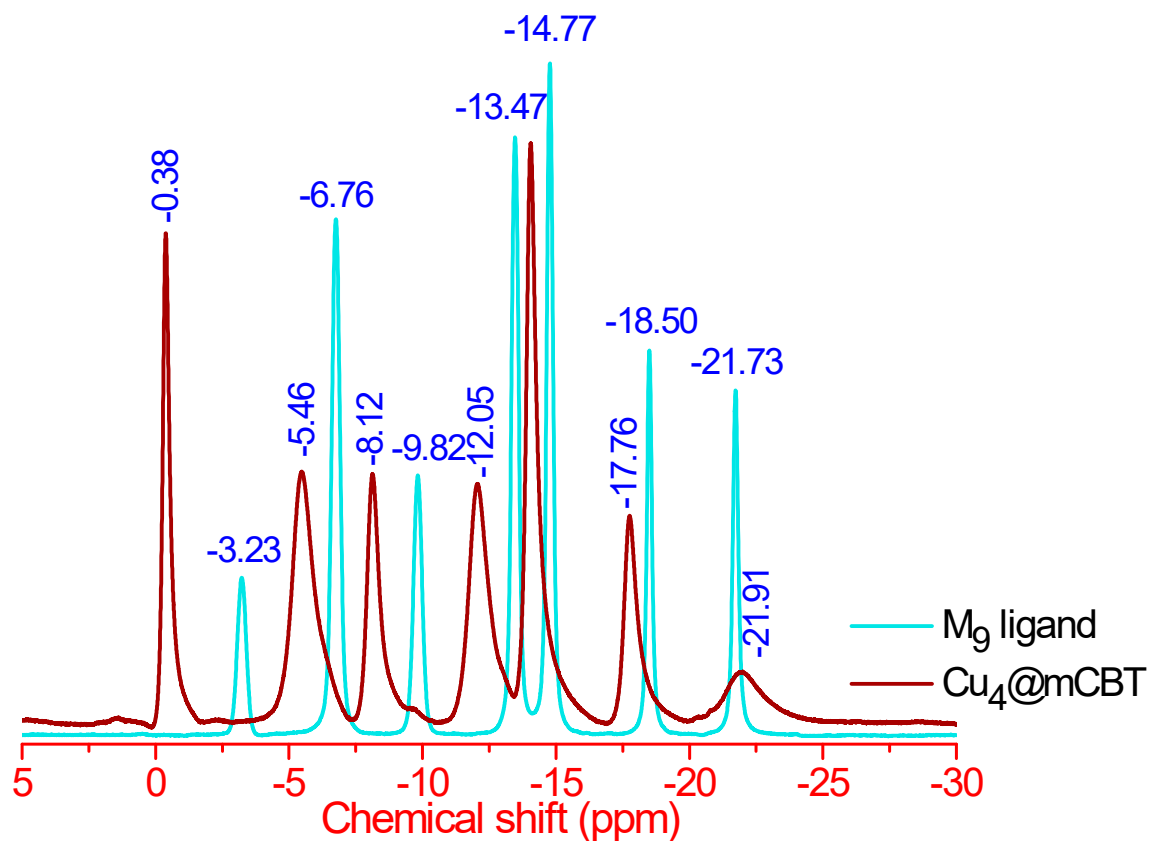

**Fig. S21** Combined  $^{11}\text{B}\{^1\text{H}\}$  NMR spectra of  $\text{Cu}_4@m\text{CBT}$  and  $\text{M}_9$  ligand.

**Table S10.**  $^{11}\text{B}\{^1\text{H}\}$  NMR chemical shift data for  $\text{Cu}_4@m\text{CBT}$  and  $\text{M}_9$  ligand.

| Chemical shift (ppm) of $\text{Cu}_4@m\text{CBT}$   | Intensity ratio |
|-----------------------------------------------------|-----------------|
| -0.38, -5.46, -8.12, -12.05, -14.05, -17.76, -21.91 | (1:2:1:2:2:1:1) |
| Chemical shift (ppm) of $\text{M}_9$ ligand         |                 |
| -3.23, -6.76, -9.82, -13.47, -14.77, -18.50, -21.73 | (1:2:1:2:2:1:1) |

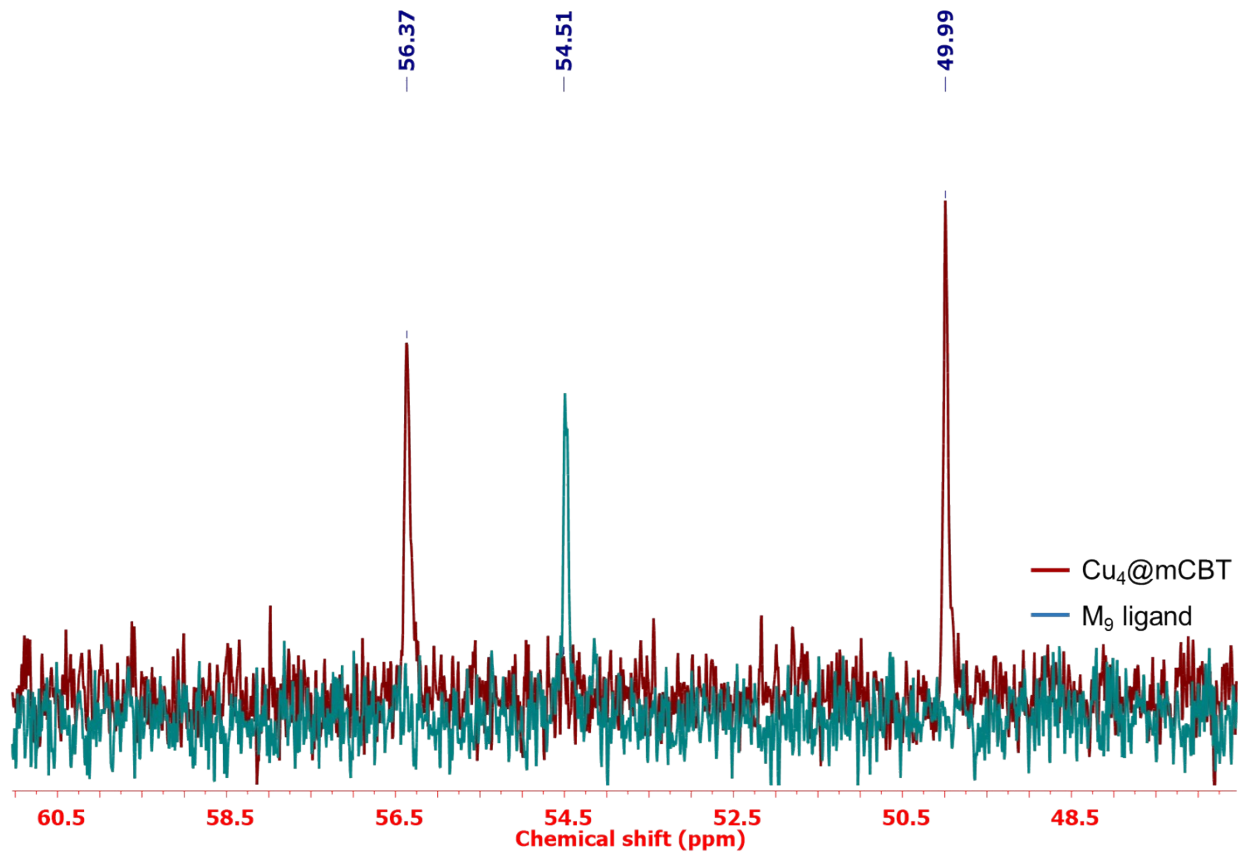

**Fig. S22** Combined  $^{13}\text{C}\{^1\text{H}\}$  NMR spectra of  $\text{Cu}_4@m\text{CBT}$  and  $\text{M}_9$  ligand.

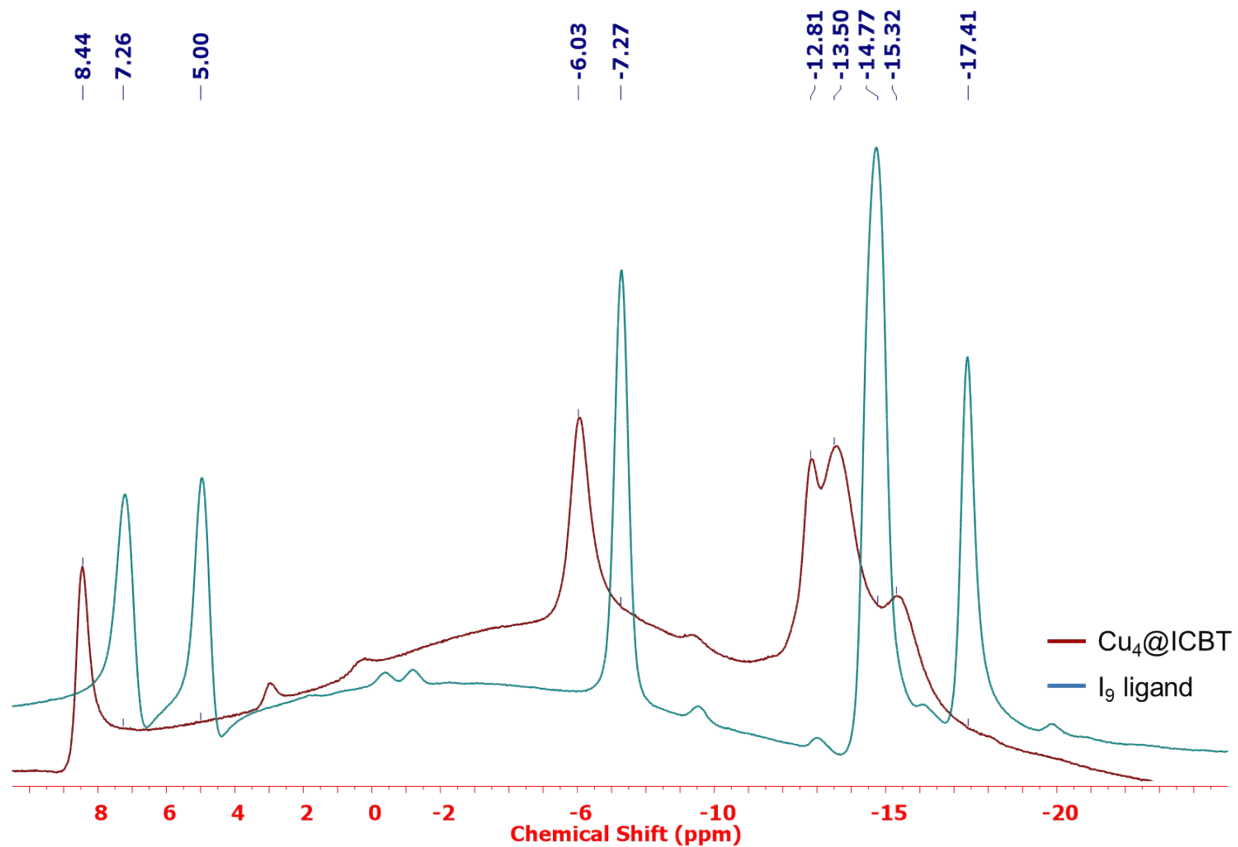

**Fig. S23** Combined  $^{11}\text{B}\{^1\text{H}\}$  NMR spectra of  $\text{Cu}_4\text{@ICBT}$  and  $\text{I}_9$  ligand.

**Table S11.**  $^{11}\text{B}\{^1\text{H}\}$  NMR chemical shift data for  $\text{Cu}_4\text{@ICBT}$  and  $\text{I}_9$  ligand.

|                                                   |                 |
|---------------------------------------------------|-----------------|
| Chemical shift (ppm) of $\text{Cu}_4\text{@ICBT}$ | Intensity ratio |
| 8.44, -6.03, -12.81, -13.50, -15.32               | (1:3:2:3:1)     |
| Chemical shift (ppm) of $\text{I}_9$ ligand       |                 |
| 7.26, 5.00, -7.27, -14.77, -17.41                 | (1:1:2:4:2)     |

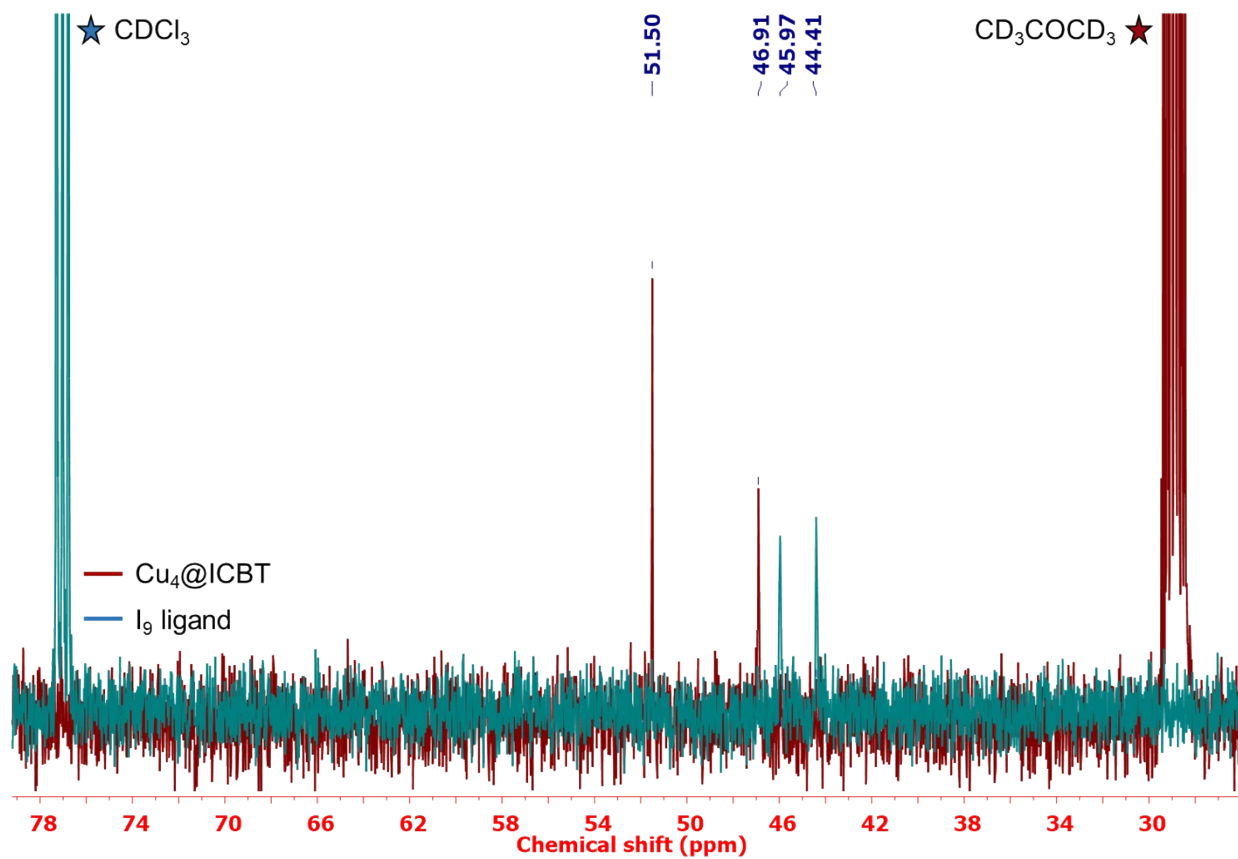

**Fig. S24** Combined  $^{13}\text{C}$   $\{^1\text{H}\}$  NMR spectra of  $\text{Cu}_4@ICBT$  and  $\text{I}_9$  ligand. Solvents peaks are marked in the respective spectrum.

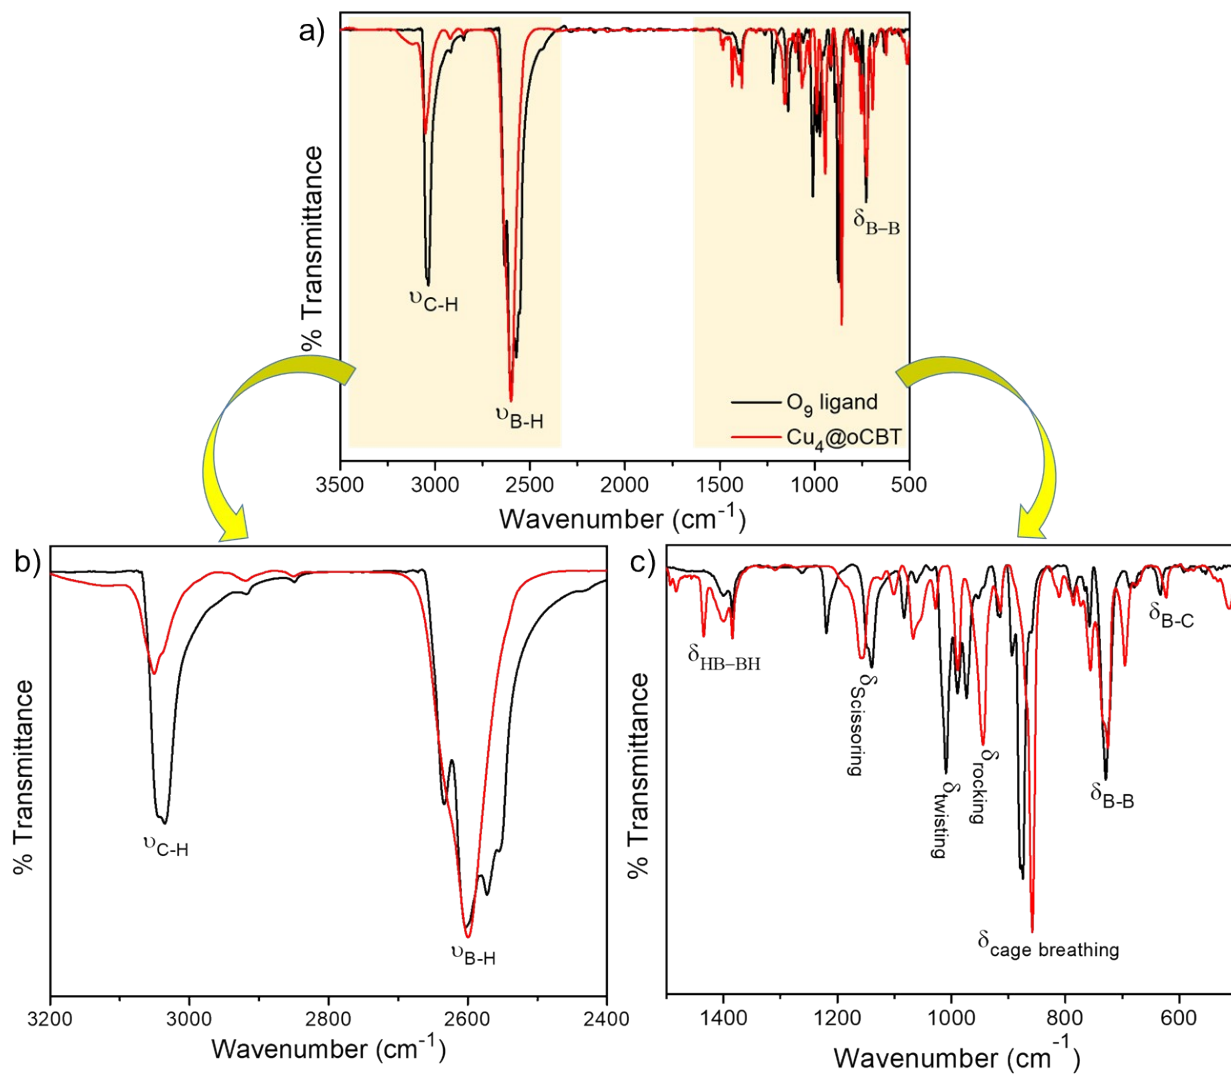

**Fig. S25** a) The full range FT-IR spectra of  $Cu_4@oCBT$  along with the  $O_9$  ligand. b, c) Enlarged view of the spectral regions. Spectral assignments are performed based on the theoretical calculations shown in Fig. S28.

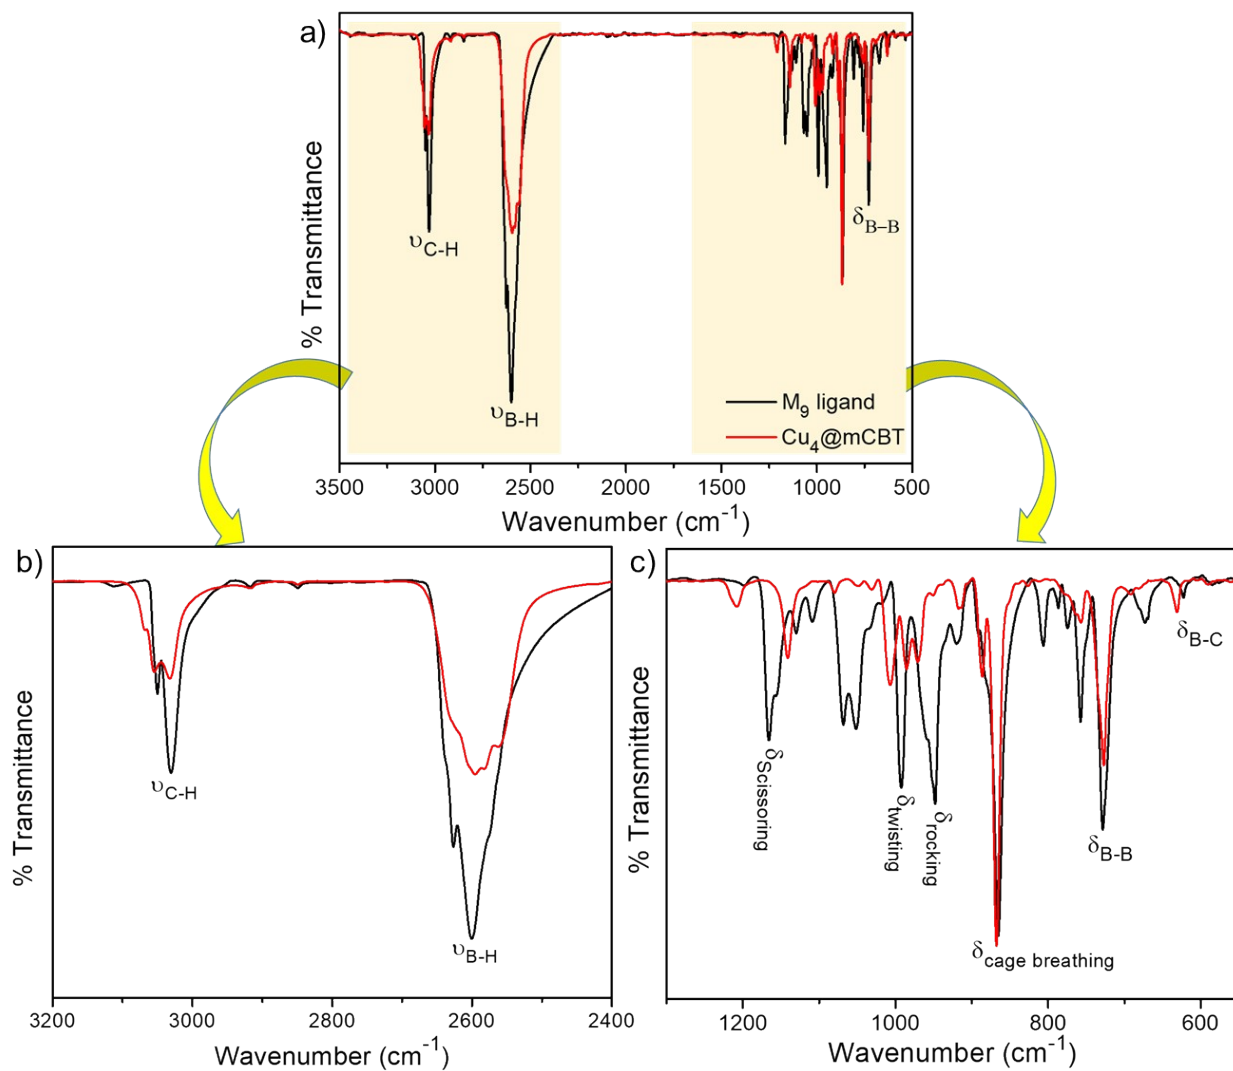

**Fig. S26** a) The full range FT-IR spectra of  $\text{Cu}_4@m\text{CBT}$  along with the  $\text{M}_9$  ligand. b, c) Enlarged view of the spectral regions.

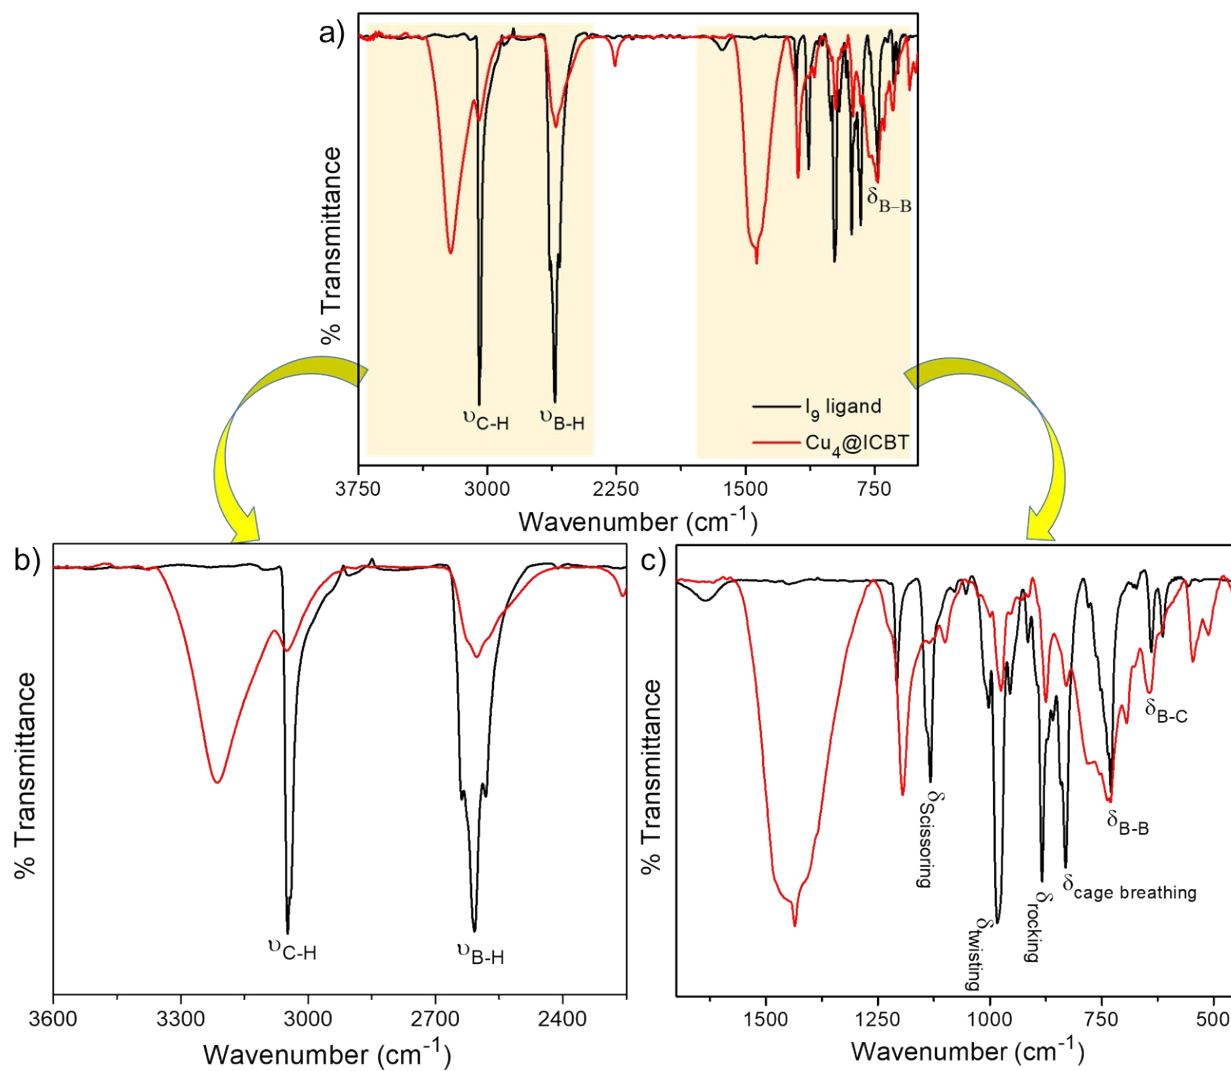

**Fig. S27** a) The full range FT-IR spectra of  $\text{Cu}_4@ICBT$  along with the  $I_9$  ligand. b, c) Enlarged view of the spectral regions. Peaks of interest are marked here.



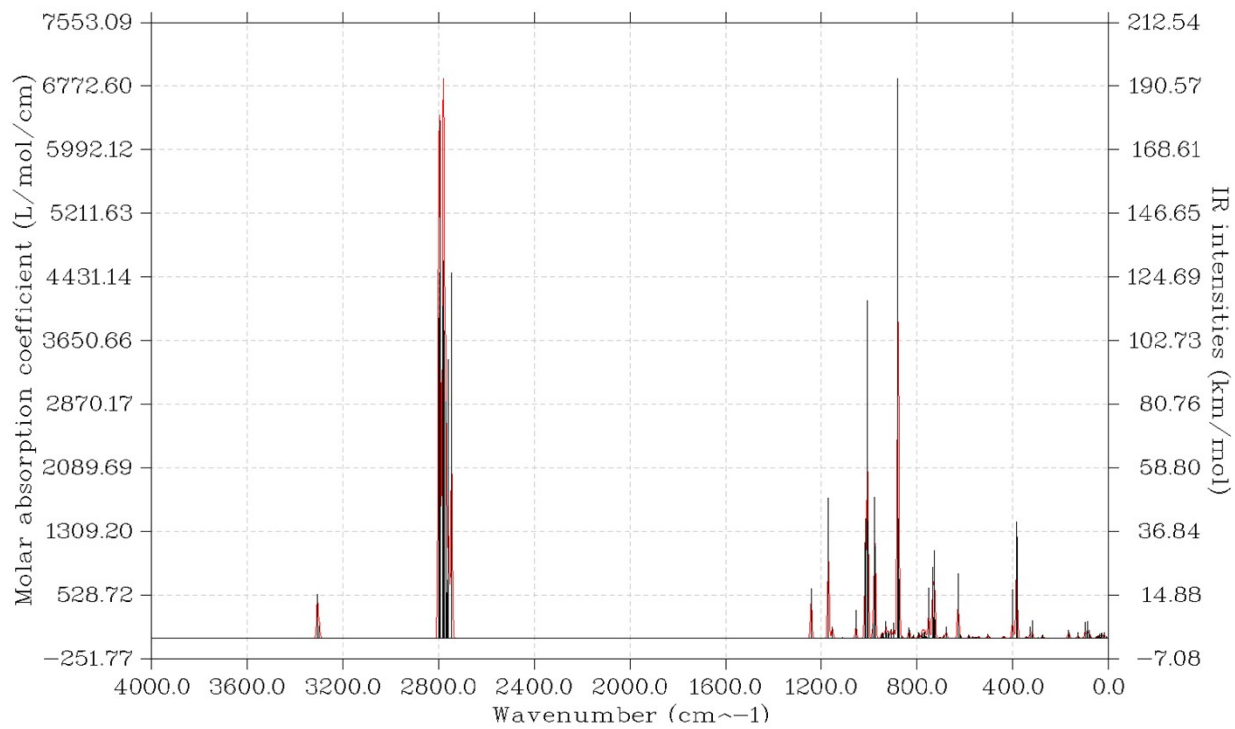

**Fig. S28** The calculated IR spectra of  $\text{Cu}_4@o\text{CBT}$  in the gas phase.

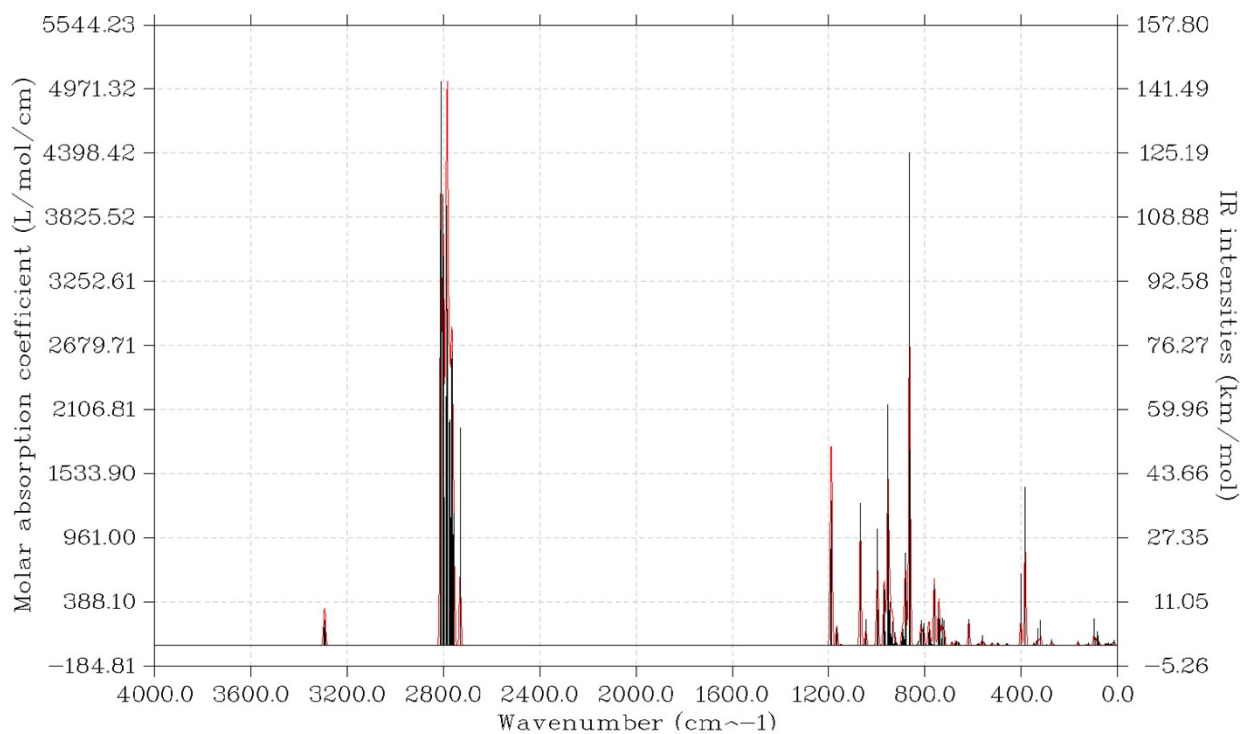

**Fig. S29** The calculated IR spectra of  $\text{Cu}_4@m\text{CBT}$  in the gas phase.

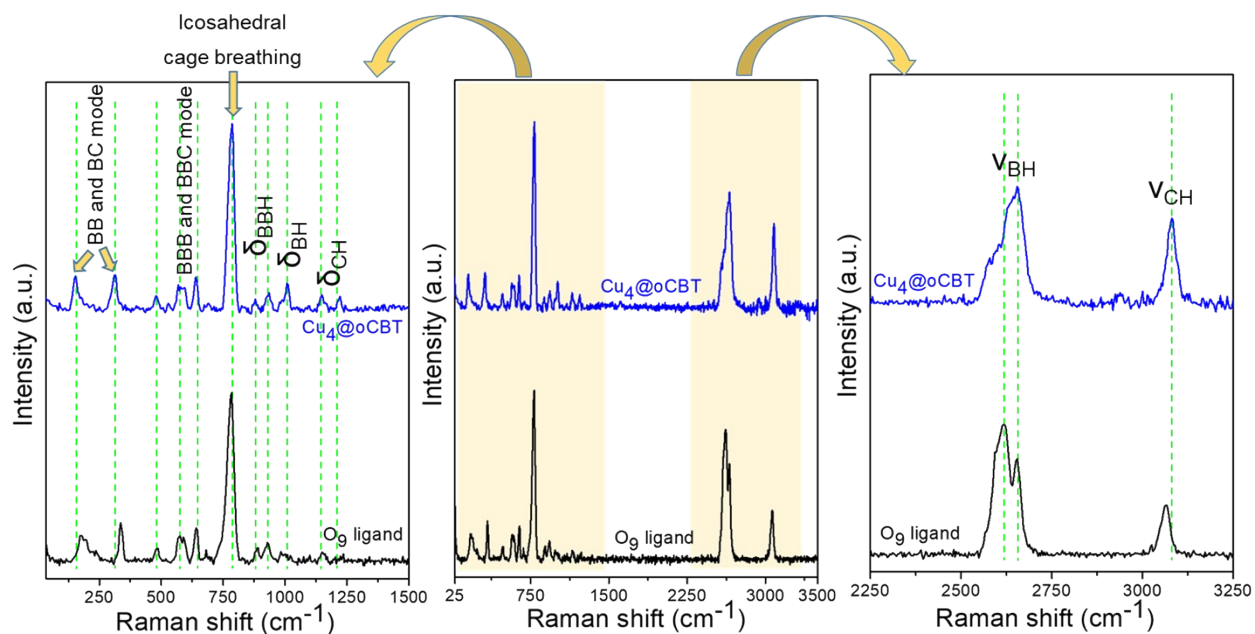

**Fig. S30** Raman spectra of  $\text{Cu}_4@o\text{CBT}$  crystals in comparison with  $\text{O}_9$  ligand. An expanded view with marked peaks shows the variation of carboranes vibrational modes in the cluster. The 532 nm laser was used for these measurements. Spectral assignments are performed following the literature.<sup>14</sup>

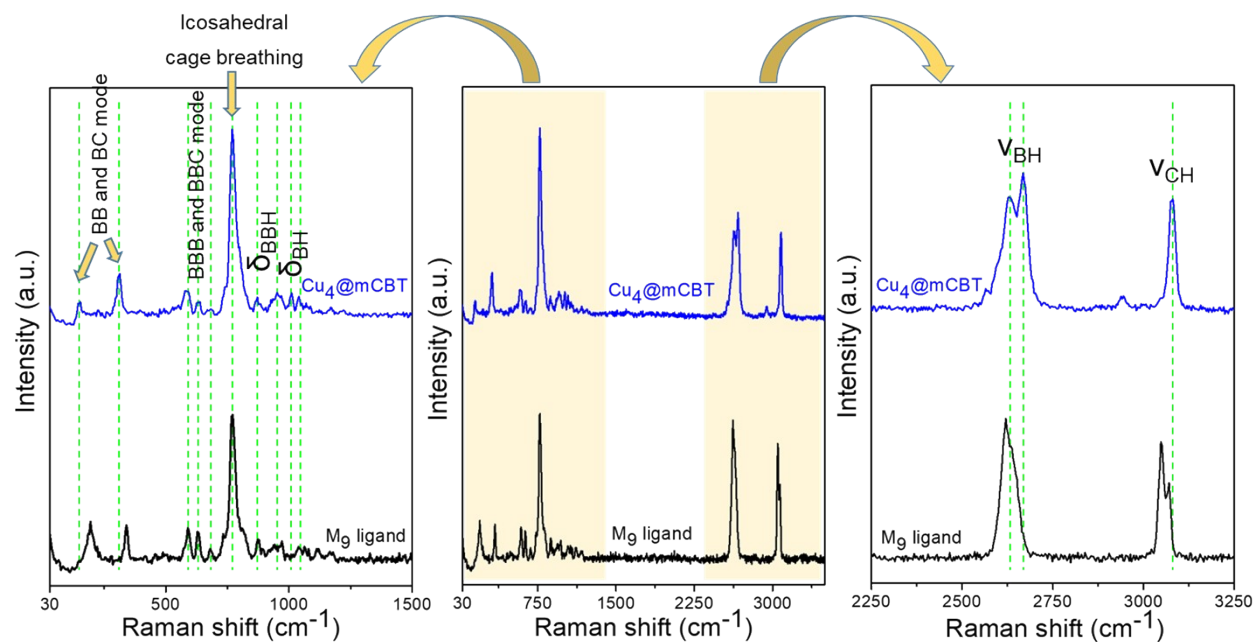

**Fig. S31** Raman spectra of  $\text{Cu}_4@m\text{CBT}$  crystals in comparison with  $\text{M}_9$  ligand. An expanded view with marked peaks shows the variation of carboranes vibrational modes in the cluster. The 532 nm laser was used for these measurements. Spectral assignments are performed following the literature.<sup>14</sup>

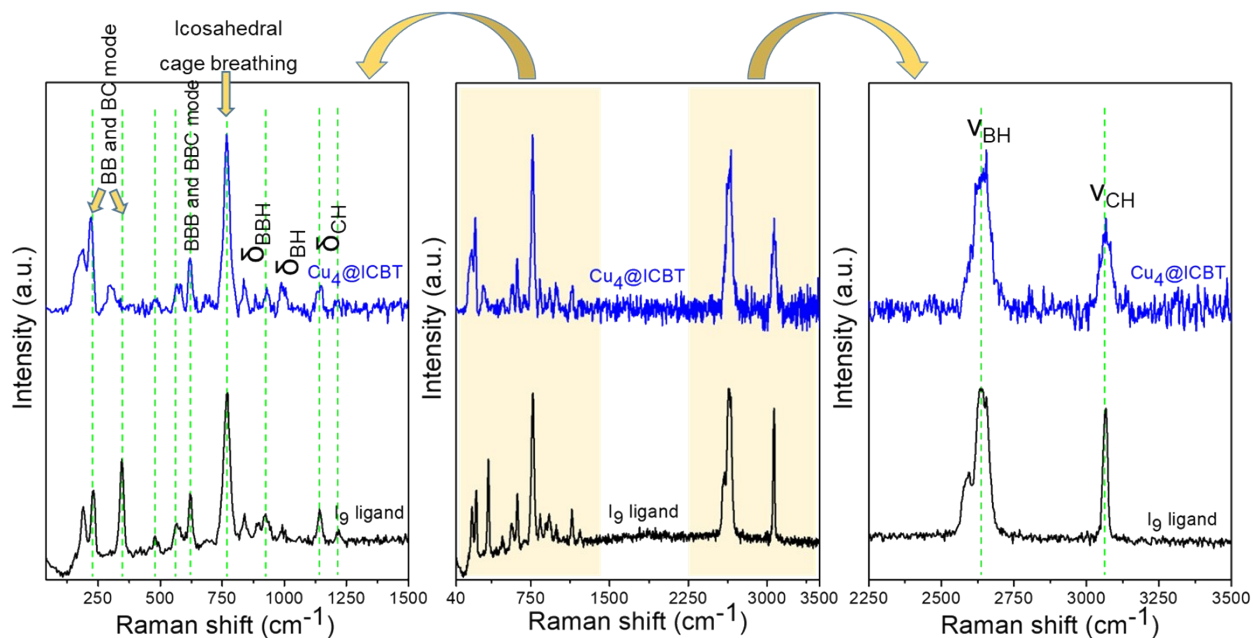

**Fig. S32** Raman spectra of  $\text{Cu}_4@ICBT$  crystals in comparison with the  $I_9$  ligand. An expanded view with marked peaks shows the variation of carboranes vibrational features in the cluster. The 532 nm laser was used for these measurements. Spectral assignments are performed following earlier literature.<sup>14</sup>

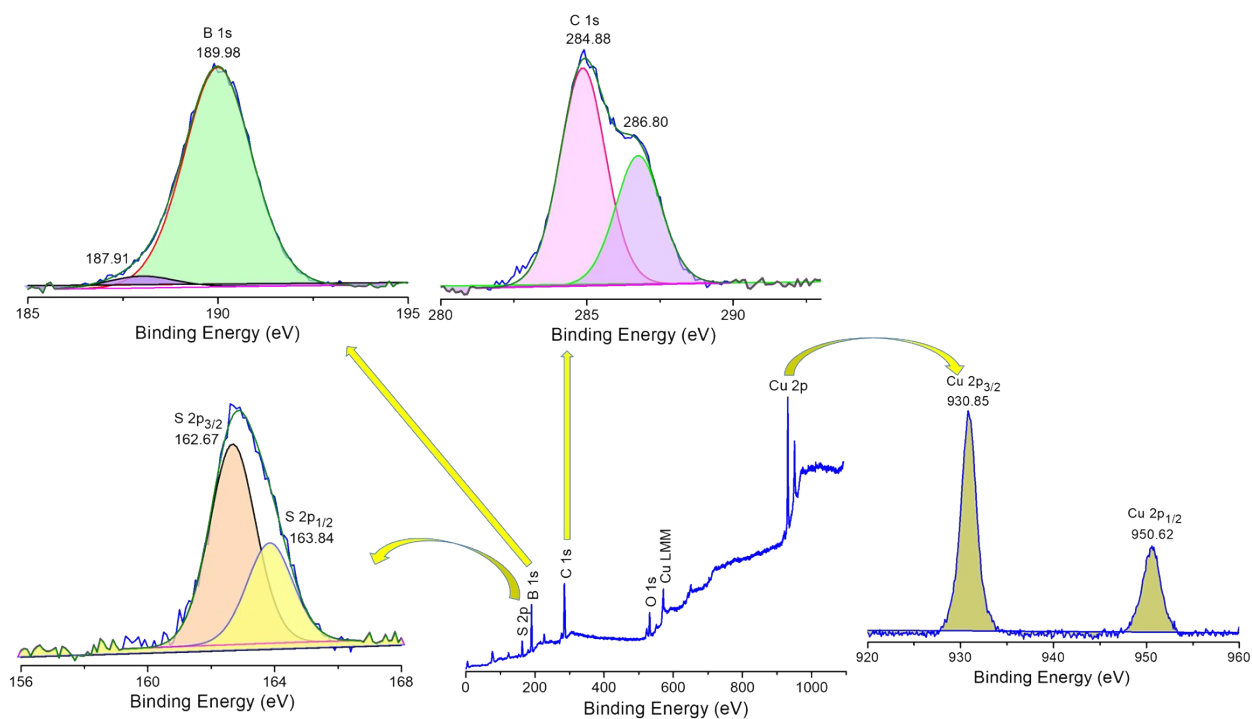

**Fig. S33** XPS spectrum of  $\text{Cu}_4@ICBT$ . The survey spectrum shows the existence of respective elements. Expanded peak fitting of Cu 2p, S 2p, C 1s and B 1s spectral regions.

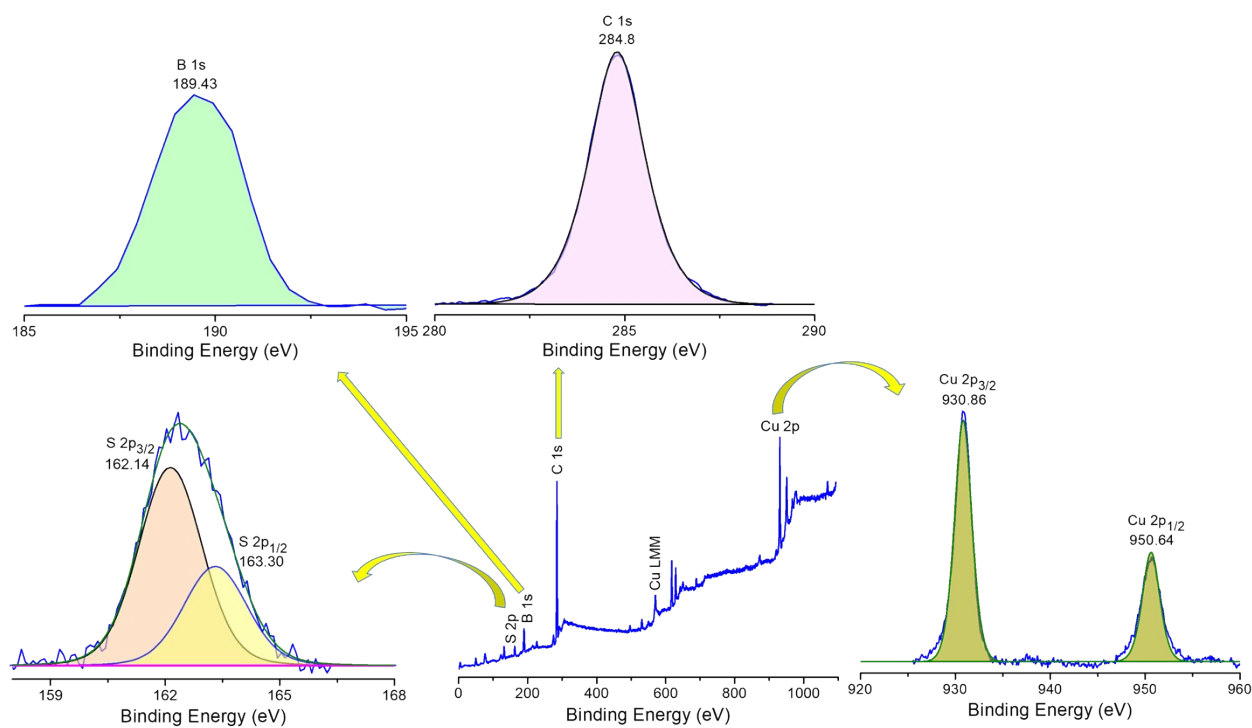

**Fig. S34** XPS spectrum of Cu<sub>4</sub>@mCBT. The survey spectrum shows the presence of respective elements. Expanded peak fitting of Cu 2p, S 2p, C 1s and B 1s spectral regions.

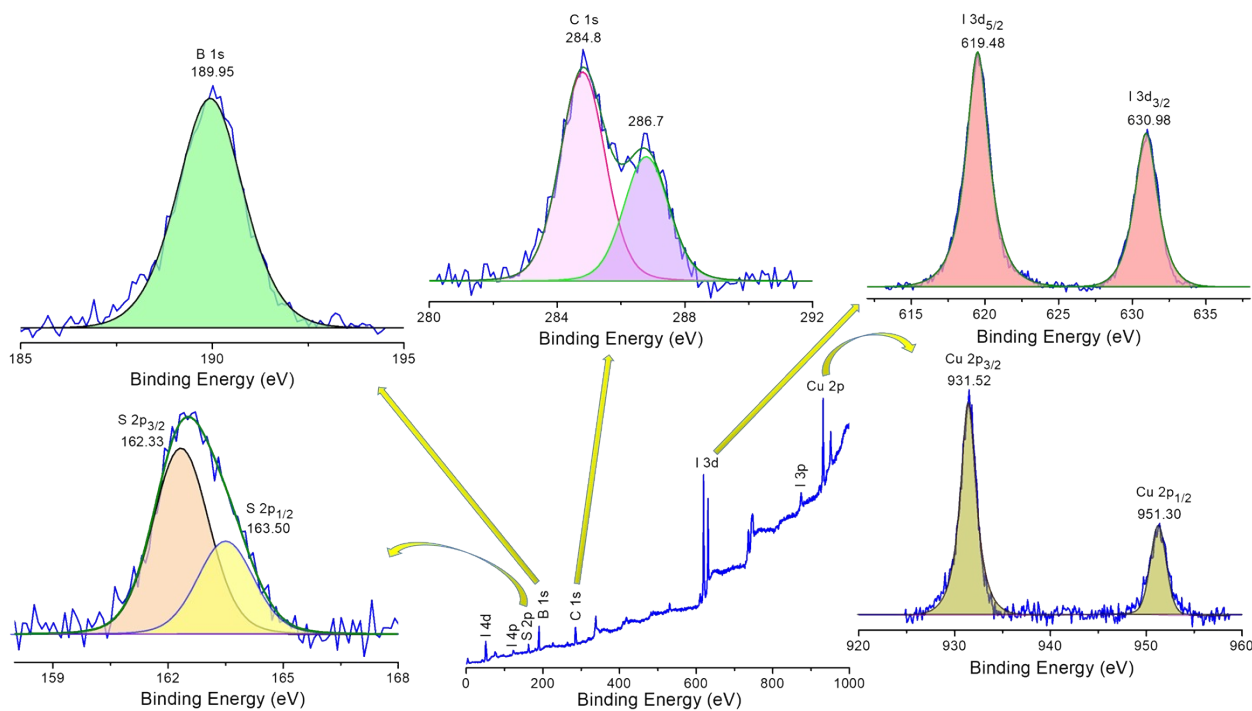

**Fig. S35** XPS spectrum of Cu<sub>4</sub>@ICBT. The survey XPS spectrum shows the presence of respective elements. Expanded peak fitting of Cu 2p, S 2p, I 3d, C 1s and B 1s spectral regions.

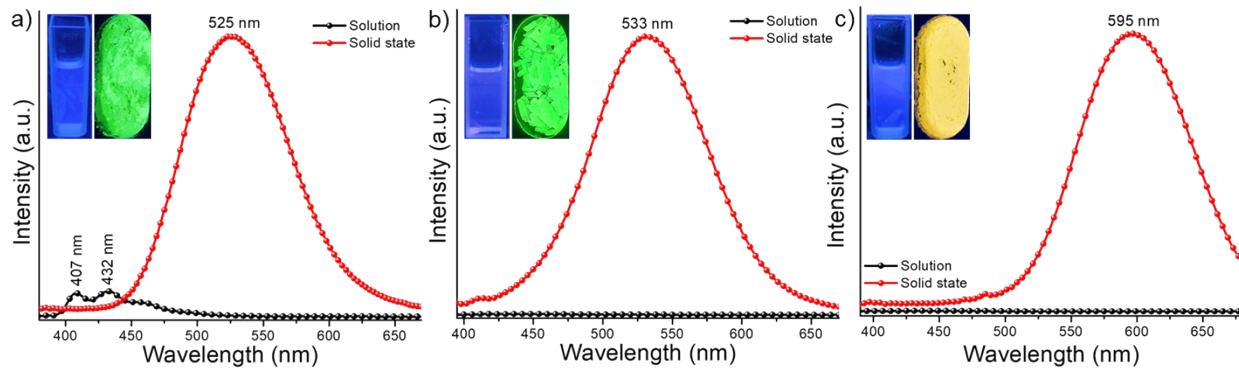

**Fig. S36** Photoluminescence spectra of a) Cu<sub>4</sub>@oCBT, b) Cu<sub>4</sub>@mCBT and c) Cu<sub>4</sub>@ICBT in the solid state as well as their respective solution (inset shows the photographic images of the respective clusters under UV lamp both in solution and in solid state).

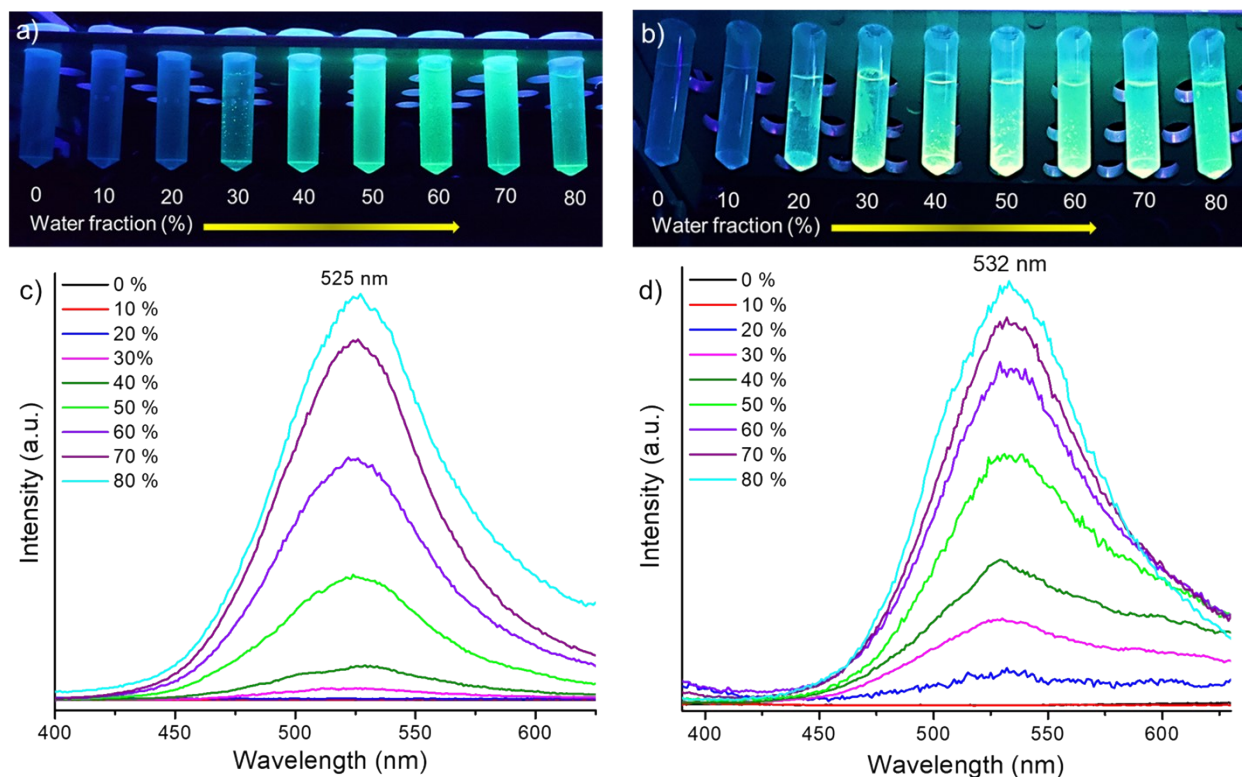

**Fig. S37** Photographs of a) Cu<sub>4</sub>@oCBT and b) Cu<sub>4</sub>@mCBT with varying fraction of water (volume %) indicating AIE behavior of these materials. The respective PL spectra of c) Cu<sub>4</sub>@oCBT and d) Cu<sub>4</sub>@mCBT with varying fraction of water.



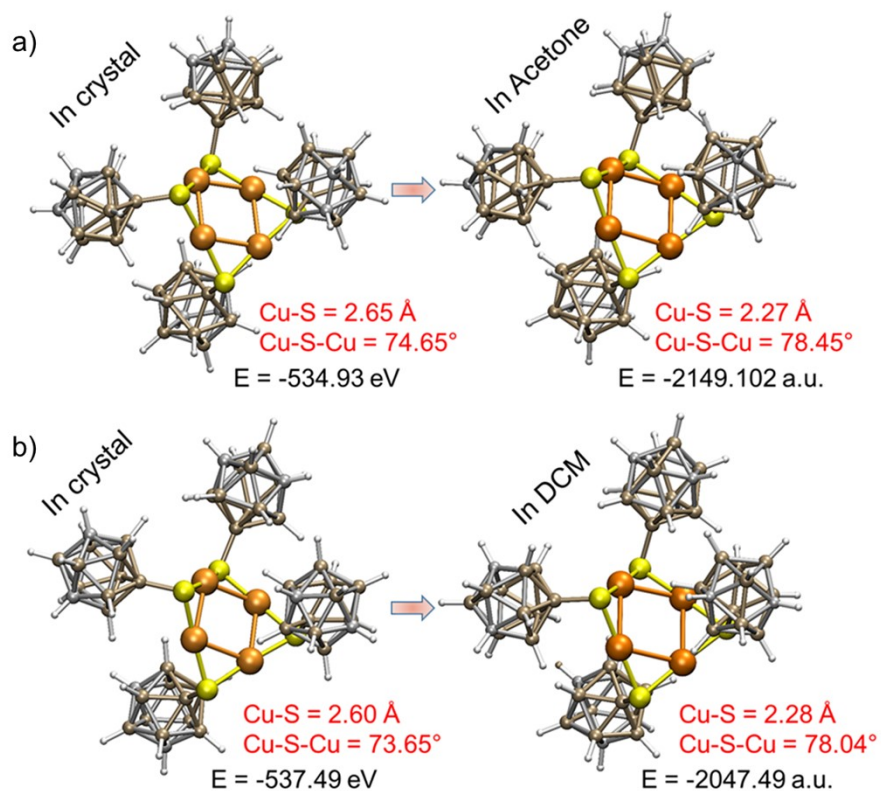

**Fig. S38** Structural variation through DFT studies of d)  $\text{Cu}_4@o\text{CBT}$  and e)  $\text{Cu}_4@m\text{CBT}$  in different states. Shortening of the distance of Cu-S bond and expansion of Cu-S-Cu bond angles were observed of these NCs.

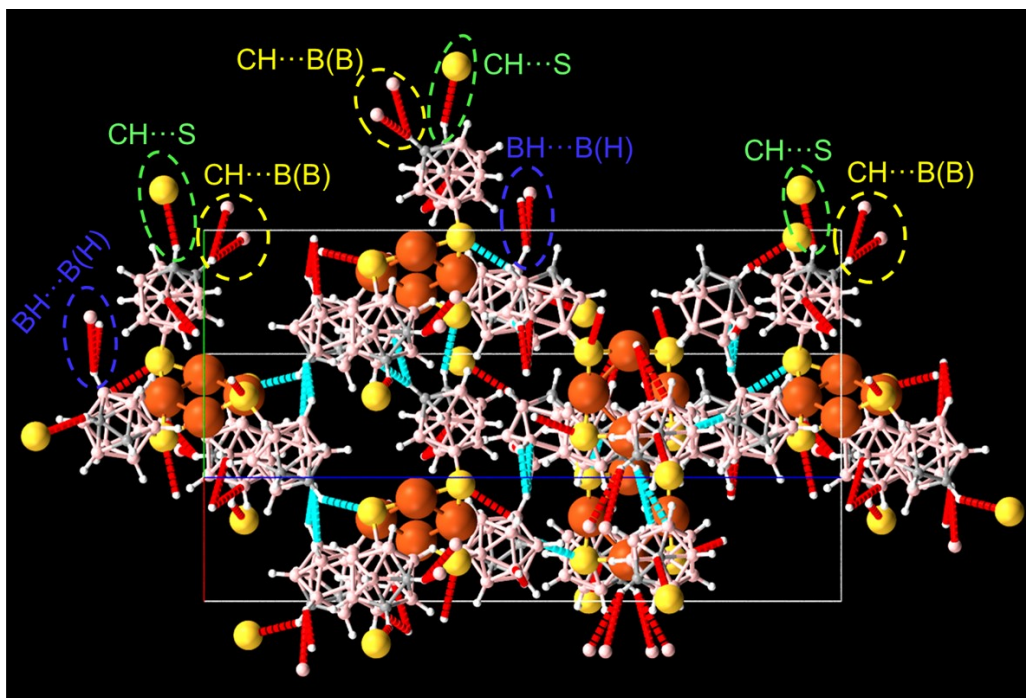

**Fig. S39** Different types of intermolecular interactions *i.e.*, CH-S, BH-BH and CH-BB present in  $\text{Cu}_4@o\text{CBT}$ .

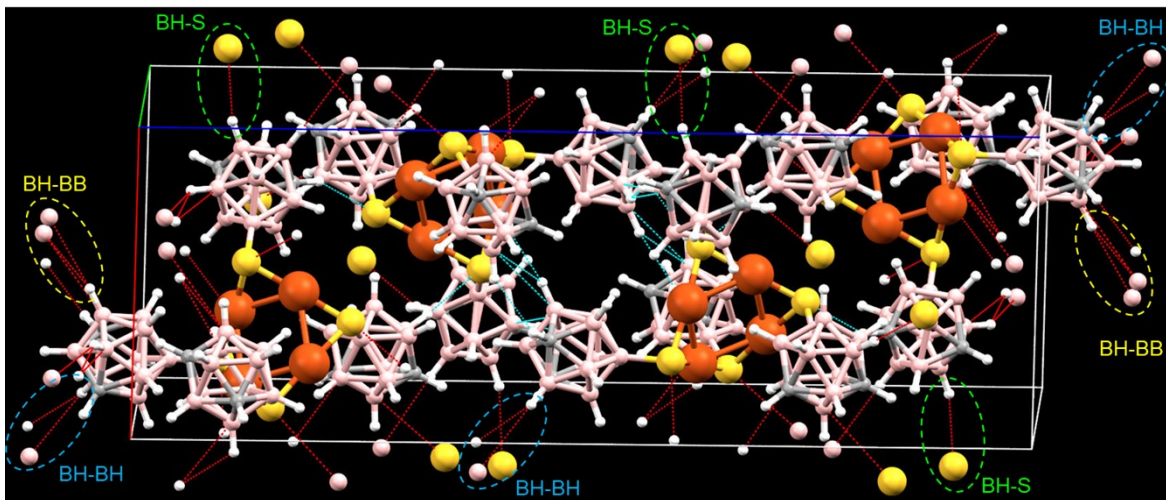

**Fig. S40** Different types of intermolecular interactions *i.e.*, BH-S, BH-BH and BH-BB present in  $\text{Cu}_4@o\text{CBT}$ .

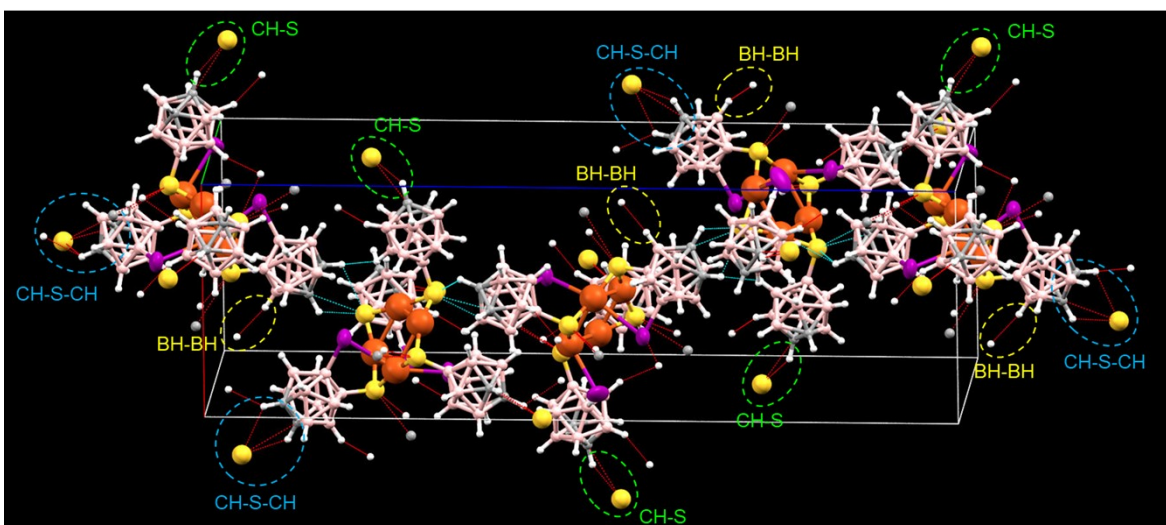

**Fig. S41** Different types of intermolecular interactions *i.e.*, CH-S-CH, BH-BH and CH-S present in  $\text{Cu}_4@i\text{CBT}$ .

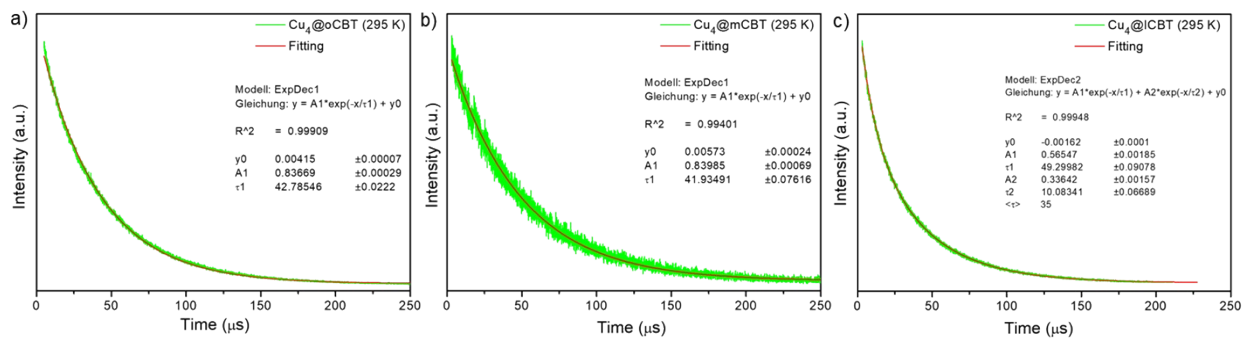

**Fig. S42** Lifetime decay profile of a)  $\text{Cu}_4@o\text{CBT}$ , b)  $\text{Cu}_4@m\text{CBT}$  and c)  $\text{Cu}_4@i\text{CBT}$  at 295 K with respective fittings.

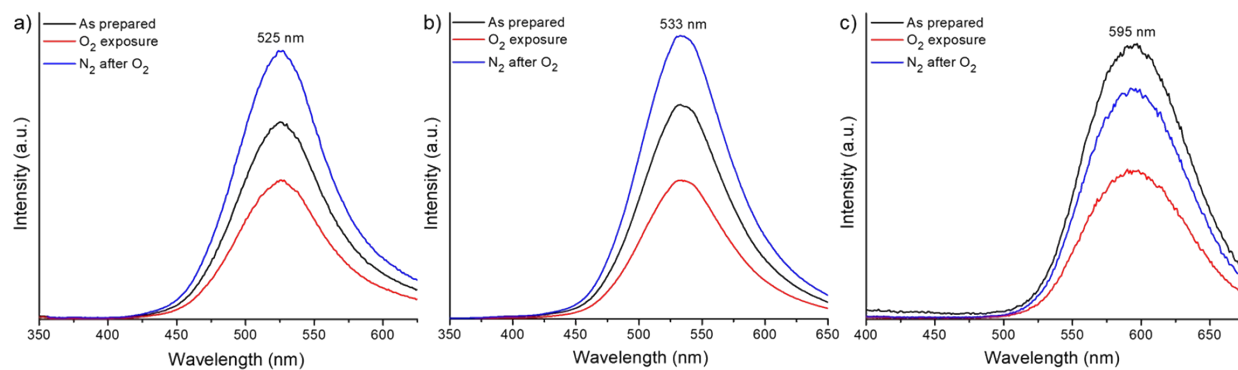

**Fig. S43** PL emission spectra of a)  $\text{Cu}_4@o\text{CBT}$ , b)  $\text{Cu}_4@m\text{CBT}$  and c)  $\text{Cu}_4@i\text{CBT}$  clusters before and after oxygen exposure. Reducing of the intensity upon  $\text{O}_2$  exposure (exposure time 12 h) suggest emission originating from the triplet state. Subsequent emission enhancement upon  $\text{N}_2$  exposure.

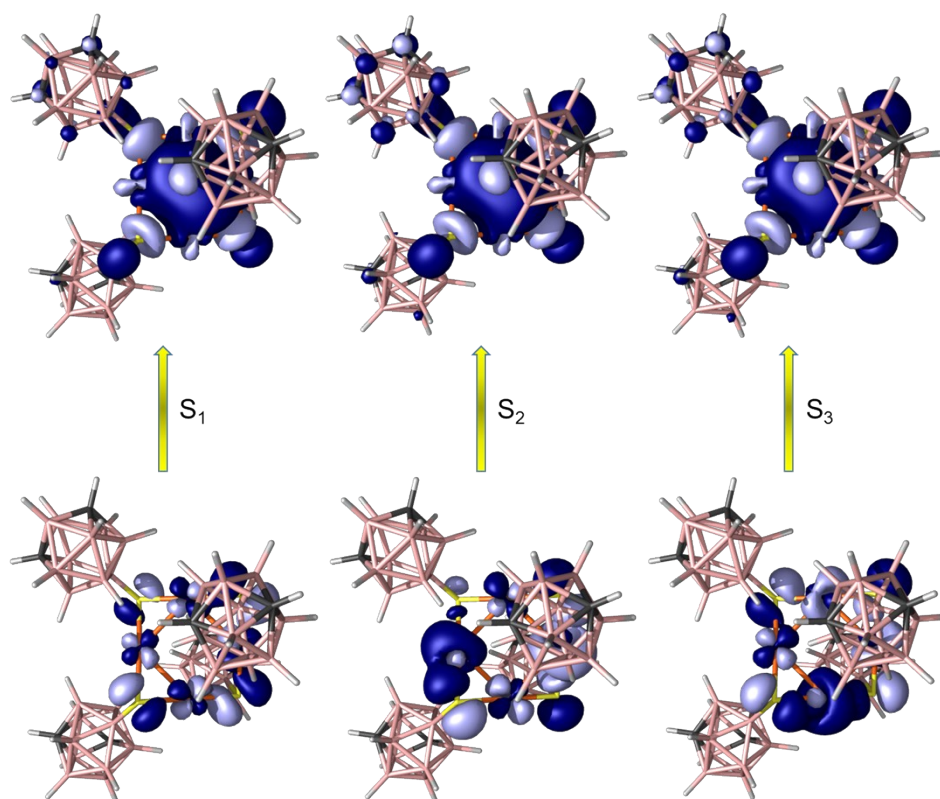

**Fig. S44** Natural transition orbitals for first 3 singlet excitations of  $\text{Cu}_4@m\text{CBT}$ .



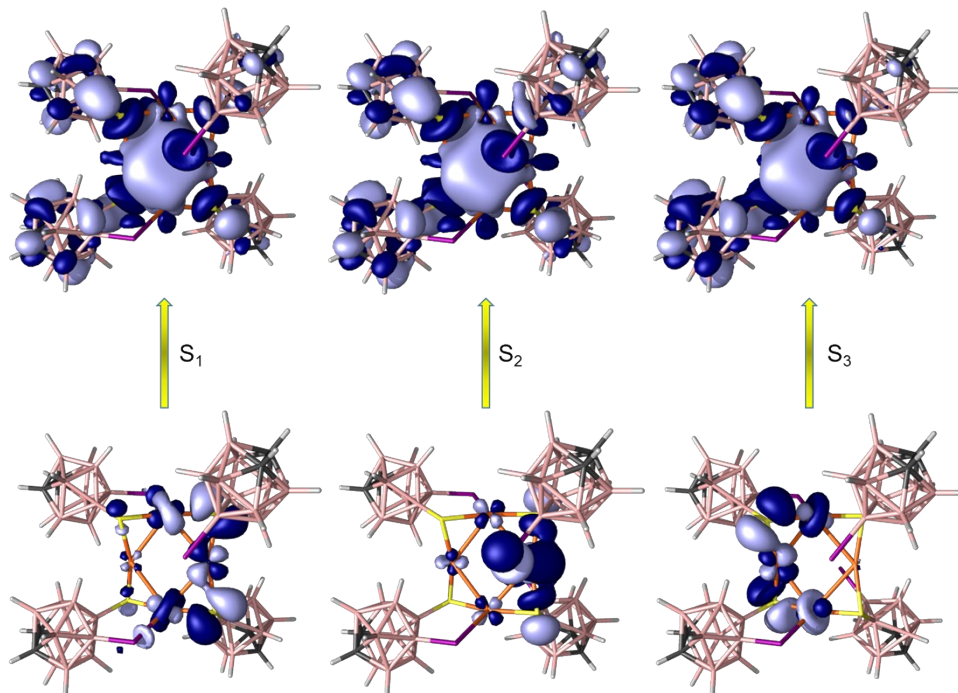

**Fig. S45** Natural transition orbitals for first 3 singlet excitations of  $\text{Cu}_4@ICBT$ .

**Table S12.** Calculated excited triplet state energies of  $\text{Cu}_4$  clusters, in eV.

| Cluster            | In vacuum ( $T_1$ ) | In solution ( $T_1$ ) | X-ray geometry ( $T_1$ ) | Relaxed triplet ( $T_1'$ ) |
|--------------------|---------------------|-----------------------|--------------------------|----------------------------|
| $\text{Cu}_4@oCBT$ | 3.89                | 3.89                  | 4.09                     | 2.35                       |
| $\text{Cu}_4@mCBT$ | 3.90                | 3.89                  | 4.19                     | -                          |
| $\text{Cu}_4@ICBT$ | 3.56                | 3.62                  | 3.82                     | 1.83                       |

**Table S13.** Calculated excited triplet state energies of  $\text{Cu}_4$  clusters, in nm.

| Cluster            | In vacuum ( $T_1$ ) | In solution ( $T_1$ ) | X-ray geometry ( $T_1$ ) | Relaxed triplet ( $T_1'$ ) |
|--------------------|---------------------|-----------------------|--------------------------|----------------------------|
| $\text{Cu}_4@oCBT$ | 318.45              | 318.50                | 303.19                   | 526.95                     |
| $\text{Cu}_4@mCBT$ | 318.18              | 318.61                | 296.08                   | -                          |
| $\text{Cu}_4@ICBT$ | 361.23              | 343.88                | 324.36                   | 679.34                     |

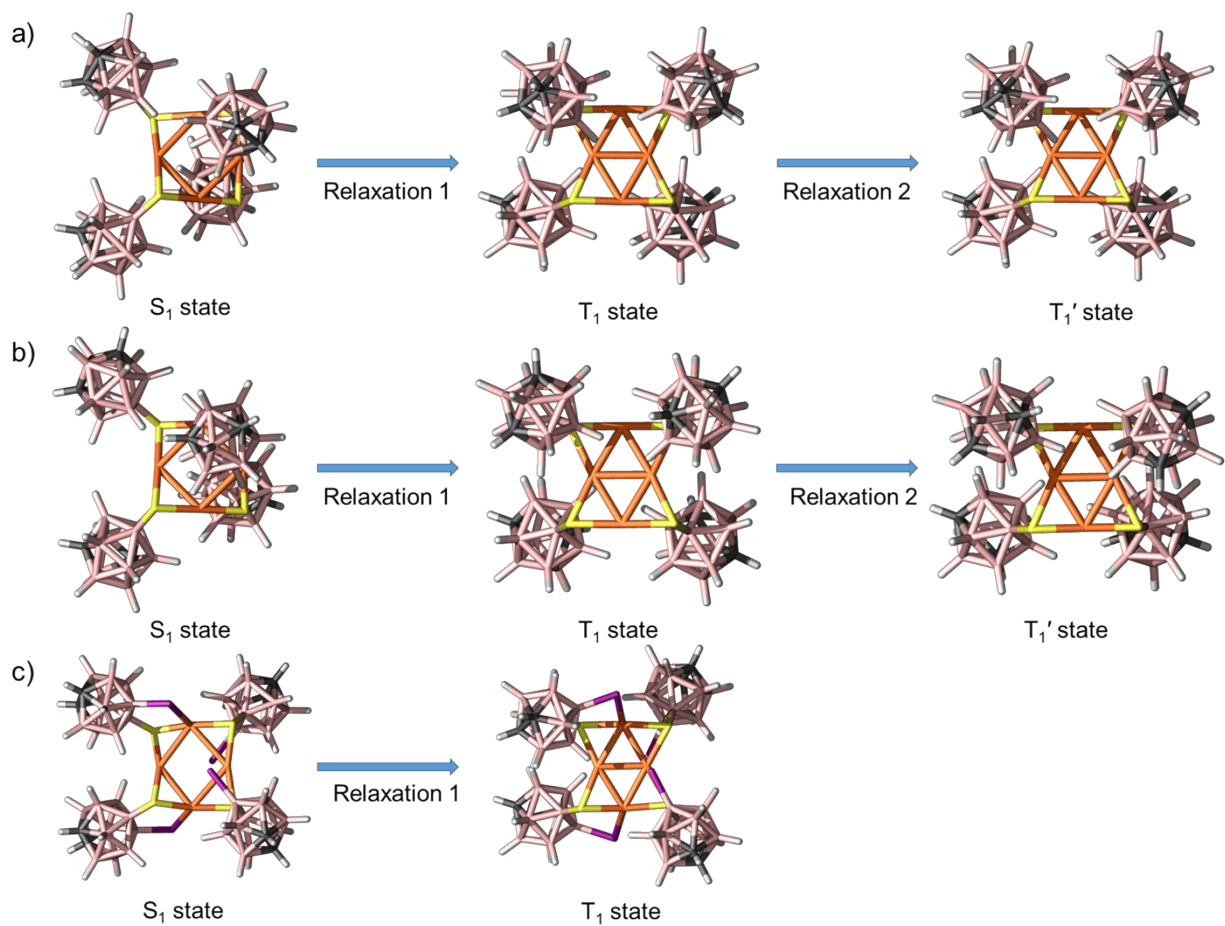

**Fig. S46** Singlet to triplet ( $S_1$  to  $T_1$ ) followed by triplet states ( $T_1$  to  $T_1'$ ) structural relaxations of a)  $\text{Cu}_4@o\text{CBT}$ , b)  $\text{Cu}_4@m\text{CBT}$  and c)  $\text{Cu}_4@i\text{CBT}$  clusters.

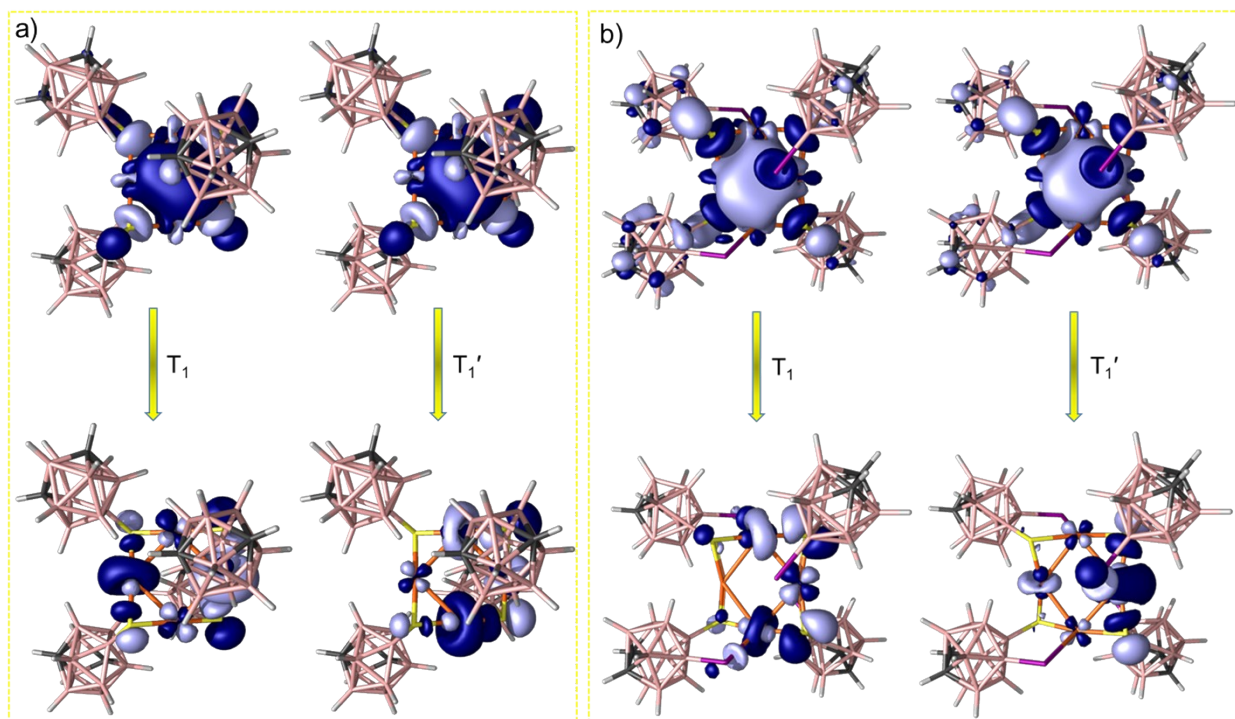

**Fig. S47** NTOs of T1 and T1' radiative relaxation of a) Cu<sub>4</sub>@mCBT and b) Cu<sub>4</sub>@ICBT clusters.

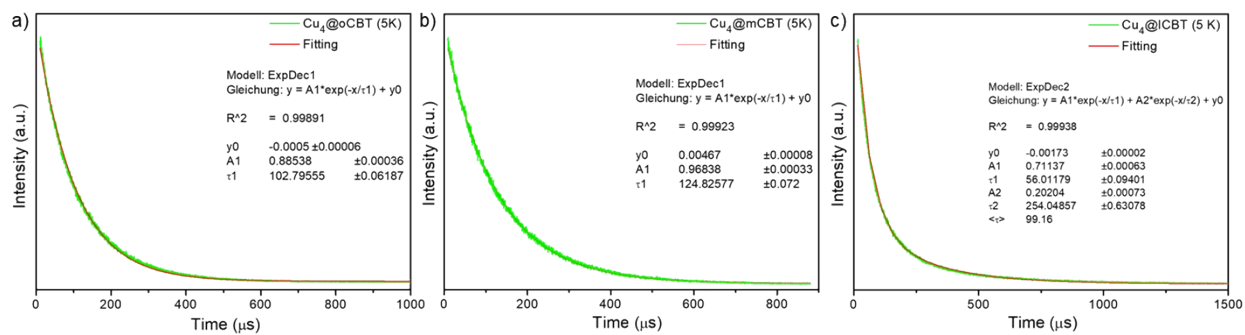

**Fig. S48** Lifetime decay profile of a) Cu<sub>4</sub>@oCBT, b) Cu<sub>4</sub>@mCBT and c) Cu<sub>4</sub>@ICBT at 5 K with respective fittings.

**Table S14.** Assignments of different lattice planes (h k l) of Cu<sub>4</sub>@oCBT through simulated PXRD.

| Sl. no | Peak position 2θ (degree) | Lattice plane (h k l) |
|--------|---------------------------|-----------------------|
| 1      | 9.001                     | (0 0 3)               |
| 2      | 9.418                     | (1 0 1)               |
| 3      | 10.76                     | (1 0 2)               |
| 4      | 12.687                    | (1 0 3)               |
| 5      | 14.982                    | (1 0 4)               |
| 6      | 15.484                    | (2 -1 0)              |
| 7      | 15.777                    | (2 -1 1)              |
| 8      | 16.621                    | (2 -1 2)              |
| 9      | 17.515                    | (1 0 5)               |
| 10     | 17.912                    | (2 0 0)               |

|    |        |           |
|----|--------|-----------|
| 11 | 18.157 | (2 0 1)   |
| 12 | 18.896 | (2 0 2)   |
| 13 | 19.65  | (2 -1 4)  |
| 14 | 20.075 | (2 0 3)   |
| 15 | 22.961 | (1 0 7)   |
| 16 | 23.46  | (2 0 5)   |
| 17 | 23.758 | (3 -1 0)  |
| 18 | 23.89  | (2 -1 6)  |
| 19 | 24.523 | (3 -1 -2) |
| 20 | 25.453 | (3 -1 -3) |
| 21 | 25.807 | (1 0 8)   |
| 22 | 26.699 | (3 -1 -4) |
| 23 | 27.161 | (3 0 1)   |
| 24 | 27.673 | (3 0 2)   |
| 25 | 28.230 | (3 -1 5)  |
| 26 | 29.638 | (3 0 -4)  |
| 27 | 30.001 | (3 -1 6)  |
| 28 | 30.234 | (2 0 8)   |
| 29 | 31.04  | (3 0 5)   |
| 30 | 31.266 | (4 -2 0)  |
| 31 | 31.482 | (2 -1 9)  |
| 32 | 31.976 | (3 -1 7)  |
| 33 | 32.69  | (3 0 -6)  |
| 34 | 33.15  | (4 -1 2)  |
| 35 | 33.61  | (4 -2 4)  |
| 36 | 33.865 | (4 -1 3)  |
| 37 | 34.143 | (3 -1 8)  |
| 38 | 34.512 | (3 0 7)   |
| 39 | 34.846 | (4 -1 -4) |

**Table S15.** Assignments of different lattice planes (h k l) of Cu<sub>4</sub>@mCBT through simulated PXRD.

| <b>Sl. no</b> | <b>Peak position 2θ (degree)</b> | <b>Lattice plane (h k l)</b> |
|---------------|----------------------------------|------------------------------|
| 1             | 5.46                             | (0 0 2)                      |
| 2             | 7.765                            | (1 0 0)                      |
| 3             | 7.881                            | (0 1 1)                      |
| 4             | 9.197                            | (0 1 2)                      |
| 5             | 9.395                            | (1 0 -2)                     |
| 6             | 9.582                            | (1 0 2)                      |
| 7             | 10.723                           | (1 1 0)                      |
| 8             | 11.037                           | (0 1 3)                      |
| 9             | 11.963                           | (1 1 -2)                     |
| 10            | 12.115                           | (1 1 2)                      |
| 11            | 13.413                           | (1 1 -3)                     |
| 12            | 13.611                           | (1 1 3)                      |
| 13            | 15.220                           | (1 1 -4)                     |
| 14            | 15.539                           | (2 0 0)                      |
| 15            | 15.805                           | (0 2 2)                      |
| 16            | 16.986                           | (1 2 1)                      |

|    |        |           |
|----|--------|-----------|
| 17 | 17.559 | (1 1 5)   |
| 18 | 17.674 | (1 2 2)   |
| 19 | 18.059 | (1 0 -6)  |
| 20 | 18.353 | (1 0 6)   |
| 21 | 18.597 | (1 2 -3)  |
| 22 | 18.962 | (2 1 -3)  |
| 23 | 19.251 | (2 1 3)   |
| 24 | 20.141 | (1 2 4)   |
| 25 | 20.633 | (2 1 4)   |
| 26 | 21.788 | (1 2 5)   |
| 27 | 22.29  | (2 1 5)   |
| 28 | 22.982 | (0 3 2)   |
| 29 | 23.206 | (2 2 3)   |
| 30 | 23.410 | (3 0 0)   |
| 31 | 23.816 | (1 3 1)   |
| 32 | 24.339 | (0 2 7)   |
| 33 | 24.672 | (3 1 -1)  |
| 34 | 25.114 | (1 3 3)   |
| 35 | 25.779 | (3 1 -3)  |
| 36 | 26.104 | (3 1 3)   |
| 37 | 26.259 | (0 3 5)   |
| 38 | 27.013 | (2 2 -6)  |
| 39 | 27.421 | (2 2 6)   |
| 40 | 27.801 | (2 1 -8)  |
| 41 | 28.64  | (2 3 3)   |
| 42 | 29.361 | (2 3 -4)  |
| 43 | 30.156 | (3 2 4)   |
| 44 | 30.803 | (2 3 5)   |
| 45 | 31.05  | (0 4 3)   |
| 46 | 31.698 | (3 1 7)   |
| 47 | 31.991 | (4 0 2)   |
| 48 | 32.183 | (1 1 -11) |
| 49 | 32.706 | (3 3 1)   |
| 50 | 32.945 | (3 3 -2)  |
| 51 | 33.401 | (2 3 -7)  |
| 52 | 33.525 | (4 1 3)   |
| 53 | 33.96  | (3 0 -9)  |
| 54 | 34.384 | (1 3 -9)  |

**Table S16.** Assignments of different lattice planes (h k l) of Cu<sub>4</sub>@ICBT through simulated PXRD.

| Sl. no | Peak position 2θ (degree) | Lattice plane (h k l) |
|--------|---------------------------|-----------------------|
| 1      | 7.3                       | (1 0 1)               |
| 2      | 8.247                     | (1 0 2)               |
| 3      | 8.879                     | (0 0 4)               |
| 4      | 9.62                      | (1 0 3)               |
| 5      | 10.07                     | (1 1 1)               |
| 6      | 10.79                     | (1 1 2)               |

|    |        |          |
|----|--------|----------|
| 7  | 11.28  | (1 0 4)  |
| 8  | 11.878 | (1 1 3)  |
| 9  | 13.11  | (1 0 5)  |
| 10 | 13.256 | (1 1 4)  |
| 11 | 13.91  | (2 0 0)  |
| 12 | 14.85  | (1 1 5)  |
| 13 | 15.045 | (1 0 6)  |
| 14 | 15.44  | (2 0 3)  |
| 15 | 15.56  | (2 1 0)  |
| 16 | 16.2   | (2 1 2)  |
| 17 | 16.55  | (2 0 4)  |
| 18 | 16.95  | (2 1 3)  |
| 19 | 17.83  | (2 0 5)  |
| 20 | 19.15  | (1 0 8)  |
| 21 | 19.32  | (2 0 6)  |
| 22 | 20.55  | (2 1 6)  |
| 23 | 21.06  | (3 0 1)  |
| 24 | 22.089 | (3 1 0)  |
| 25 | 22.19  | (3 1 1)  |
| 26 | 22.38  | (1 1 9)  |
| 27 | 22.53  | (3 1 2)  |
| 28 | 22.67  | (2 0 8)  |
| 29 | 22.77  | (3 0 4)  |
| 30 | 23.09  | (3 1 3)  |
| 31 | 23.86  | (3 1 4)  |
| 32 | 24.49  | (2 0 9)  |
| 33 | 25.23  | (3 2 0)  |
| 34 | 25.31  | (3 2 1)  |
| 35 | 25.49  | (2 1 9)  |
| 36 | 27.321 | (2 1 10) |
| 37 | 28.516 | (3 1 8)  |
| 38 | 29.772 | (3 2 7)  |
| 39 | 29.958 | (2 2 10) |
| 40 | 31.179 | (2 1 12) |
| 41 | 31.754 | (4 2 2)  |
| 42 | 32.436 | (3 2 9)  |
| 43 | 32.737 | (4 2 4)  |
| 44 | 33.276 | (3 1 11) |
| 45 | 34.294 | (3 0 12) |

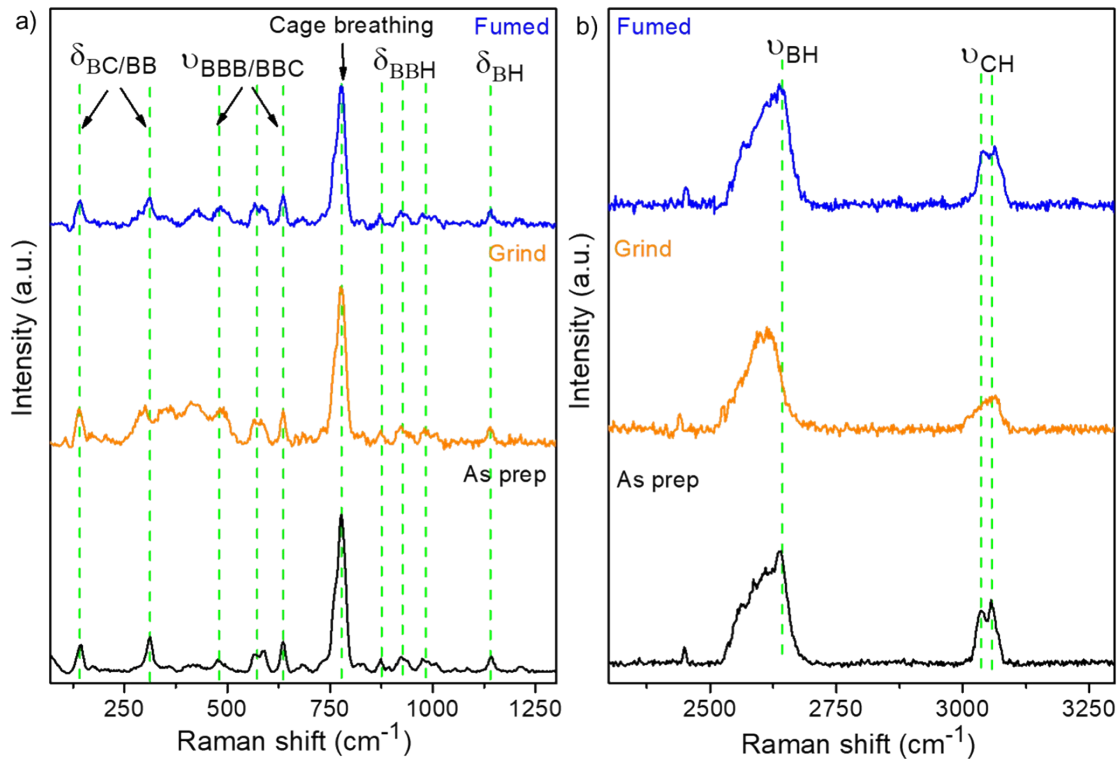

**Fig. S49** Comparative Raman spectra of  $\text{Cu}_4@o\text{CBT}$  during mechanical grinding and solvent fuming experiment.

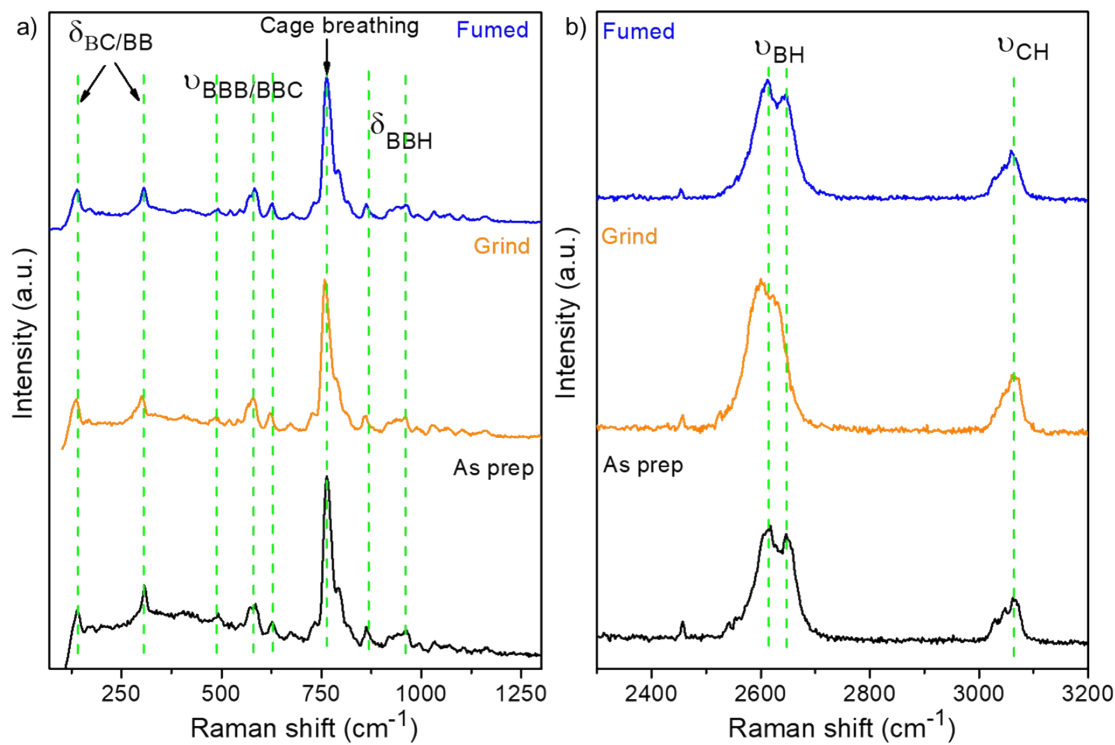

**Fig. S50** Comparative Raman spectra of  $\text{Cu}_4@m\text{CBT}$  during mechanical grinding and solvent fuming experiment.

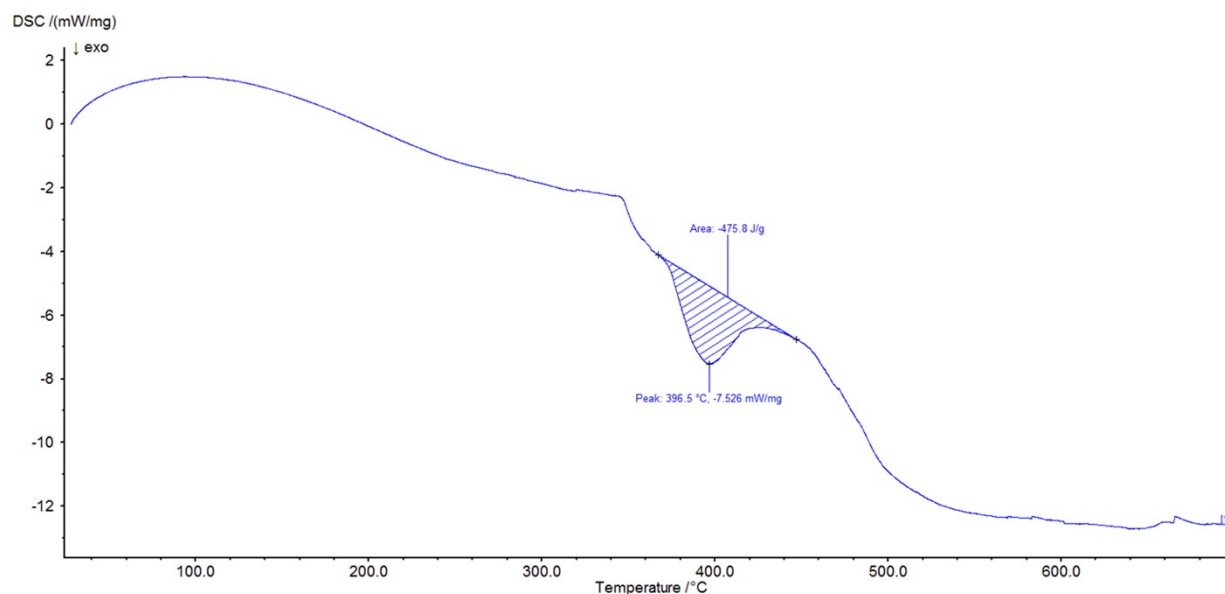

**Fig. S51** Differential scanning calorimetry (DSC) data of  $\text{Cu}_4@o\text{CBT}$  microcrystals. Data was collected upon heating the sample from 25 to 750 °C. The first exothermic peak at 396.5 °C indicates superior thermal stability of the cluster.

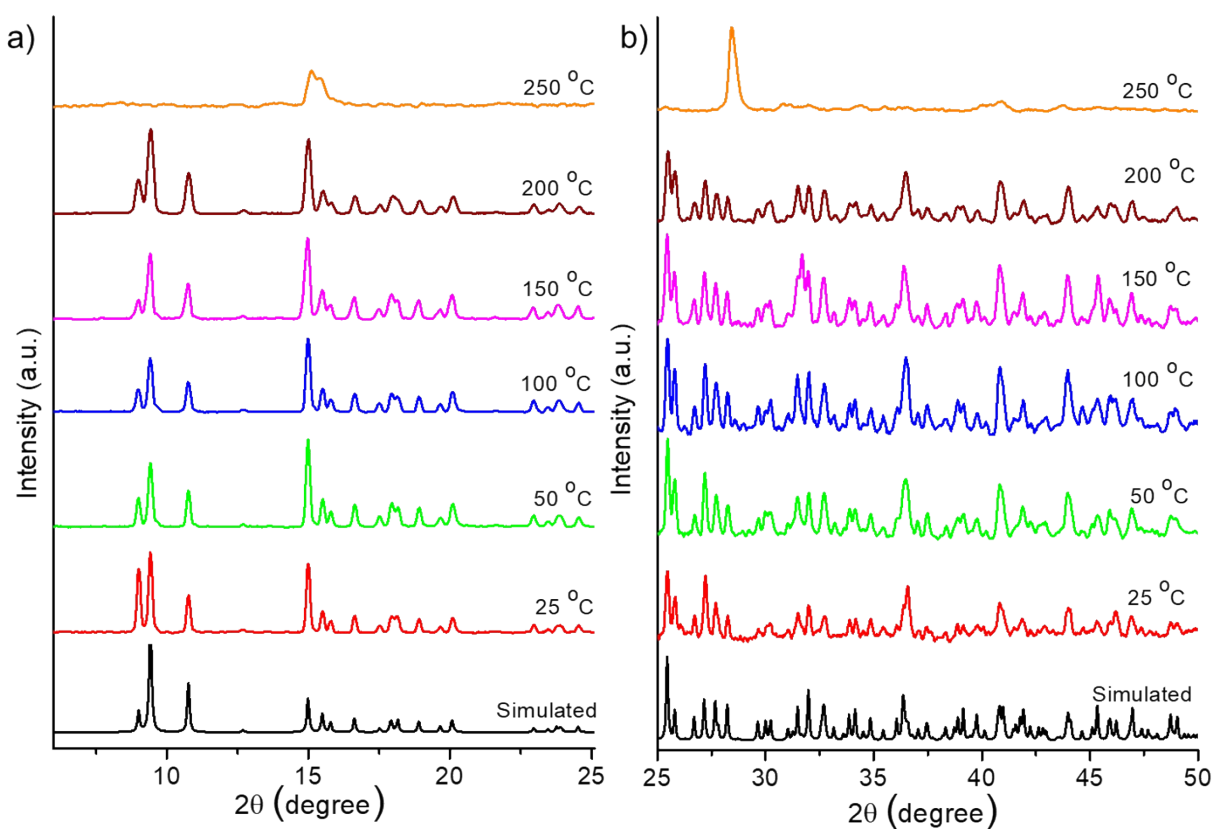

**Fig. S52** Magnified PXRD pattern of  $\text{Cu}_4@o\text{CBT}$  microcrystalline powder after heating different temperatures at a) 5-25° region and b) 25° to 50° region (3 x magnification). There is no significant change of peak patterns indicating phase stability of the NC upon heating.



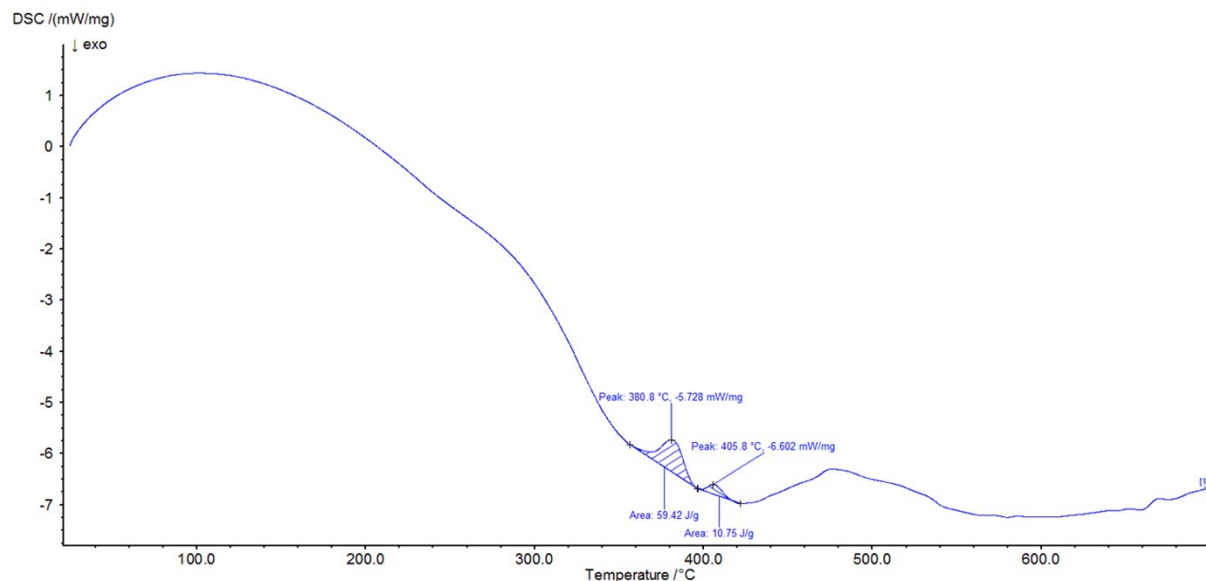

**Fig. S53** Differential scanning calorimetry (DSC) data of  $\text{Cu}_4\text{@mCBT}$  microcrystals. Data was collected upon heating the sample from 25 to 750 °C.

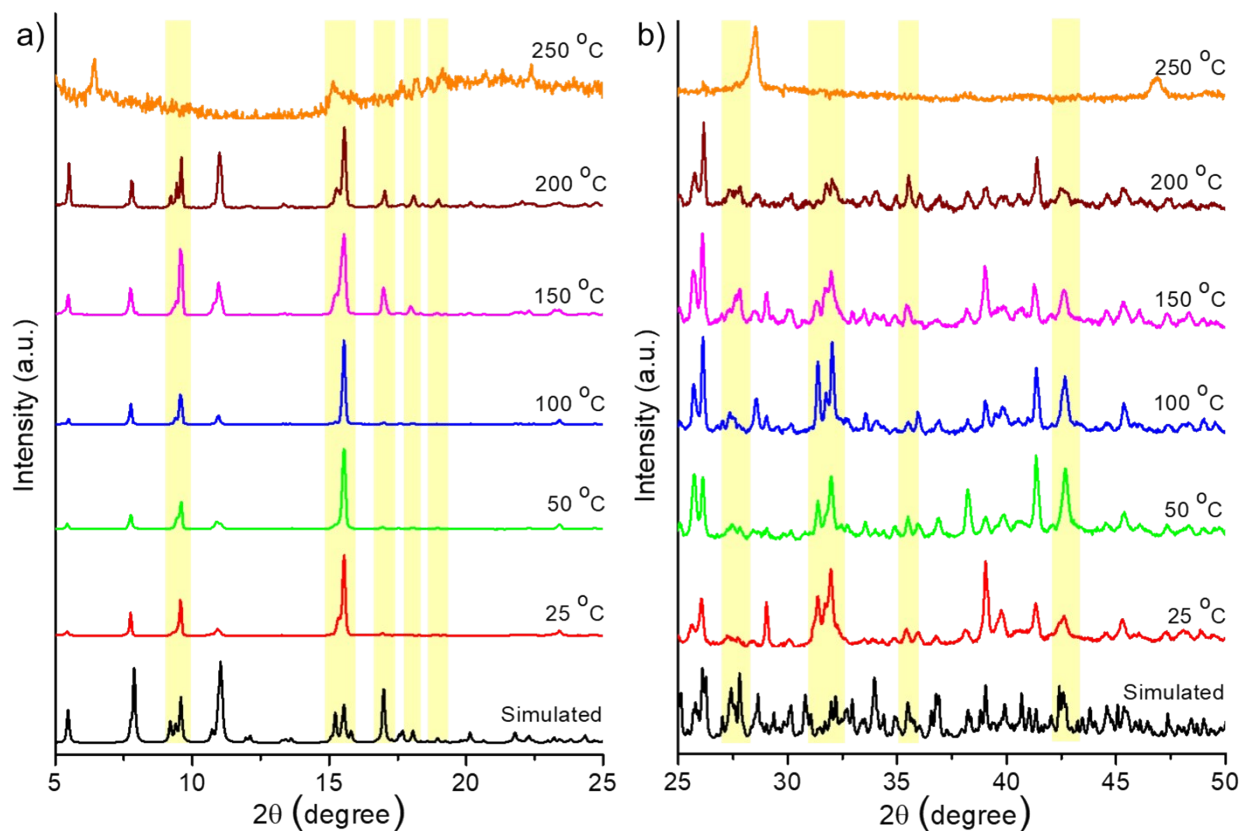

**Fig. S54** Magnified PXRD pattern of microcrystalline  $\text{Cu}_4\text{@mCBT}$  after heating different temperatures at a) 5-25° region and b) 25-50° region (5x magnification). Highlighted peaks indicated the change of the diffraction patterns after 150 °C heating, which indicates temperature-induced structural distortion, which leads to the yellow emission from the sample.

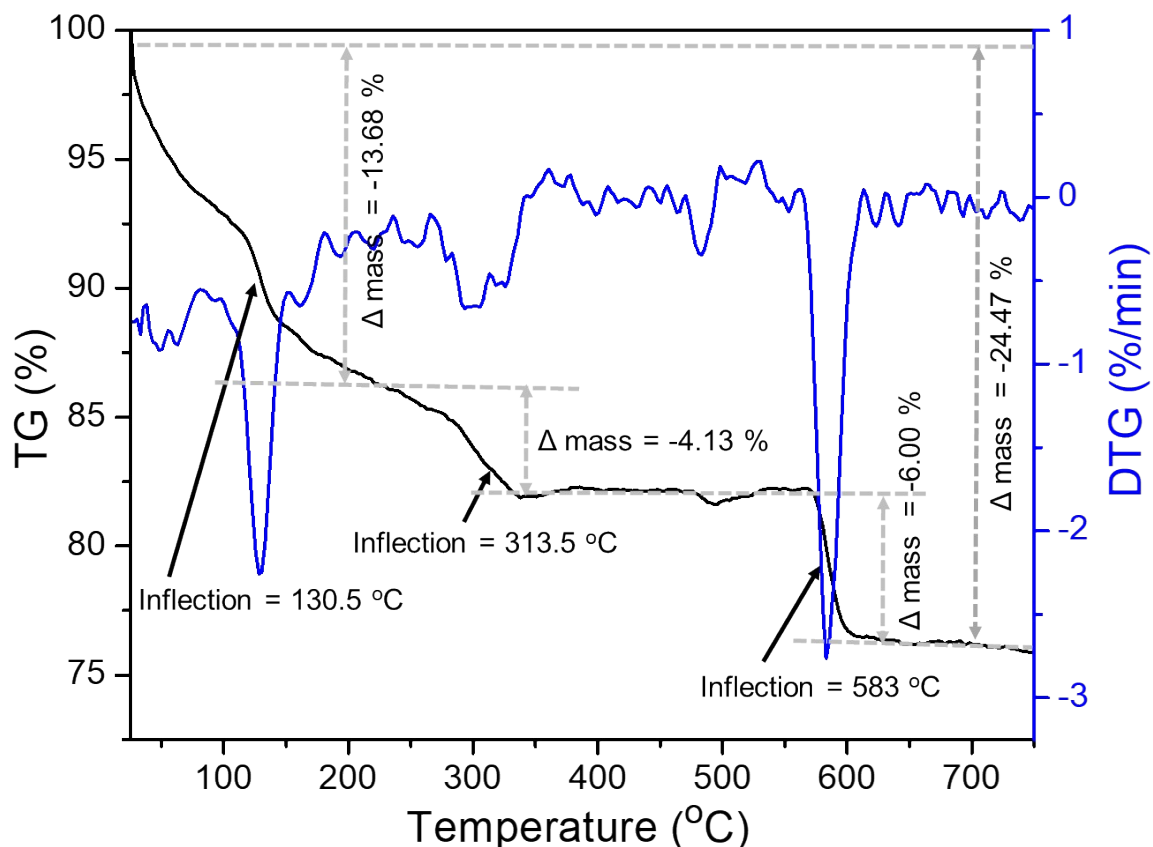

**Fig. S55** TGA DTG spectra showed less thermal stability of  $\text{Cu}_4\text{@ICBT}$  compared to  $\text{Cu}_4\text{@oCBT}$  and  $\text{Cu}_4\text{@mCBT}$  derivatives.

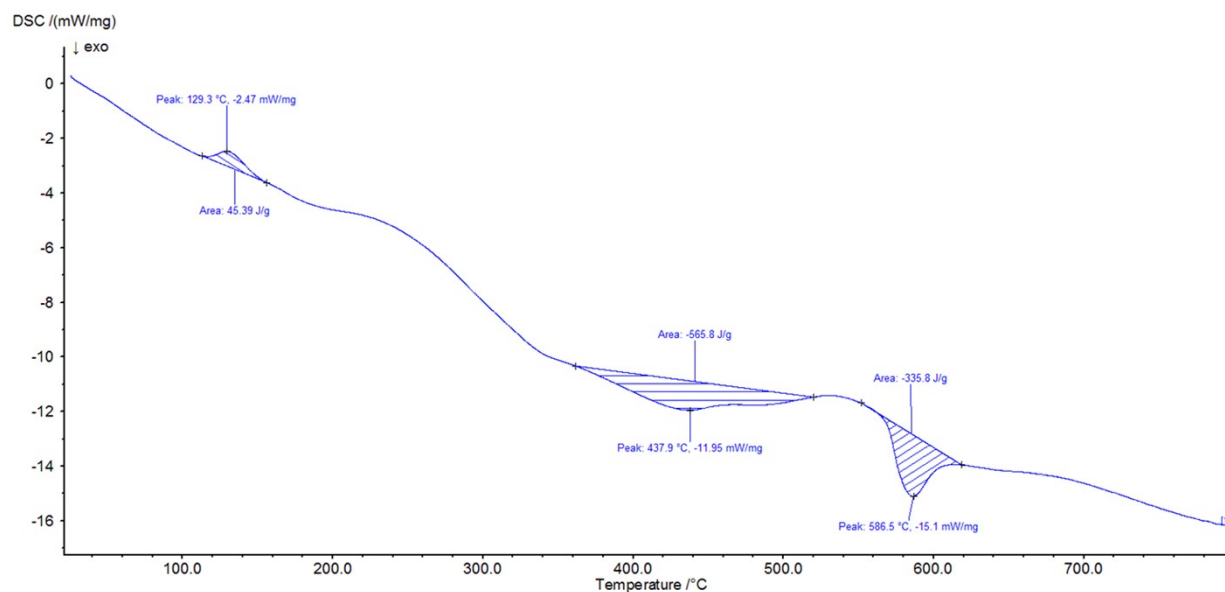

**Fig. S56** Differential scanning calorimetry (DSC) data of  $\text{Cu}_4\text{@ICBT}$  microcrystals. Spectrum was collected upon heating the sample from 25 to 750 °C. The first endothermic peak at 129 °C indicates lower thermal stability than  $\text{Cu}_4\text{@oCBT}$  and  $\text{Cu}_4\text{@mCBT}$ .

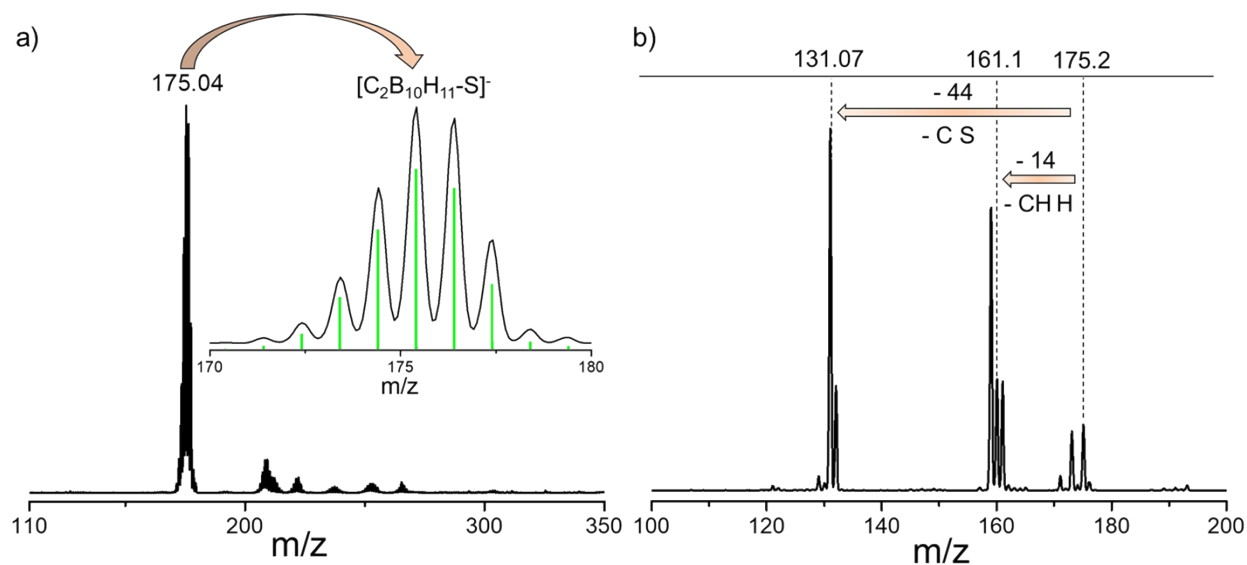

**Fig. S57** a) Negative ion-mode ESI-MS spectrum of *ortho*-carborane 9-thiol ligand. Inset shows isotopic distribution of the experimental spectrum (black), centered at  $m/z$  175.04 matches well with theoretical spectrum (green). b) The MS/MS fragmentation of the molecular ion peak shows the losses of different fragments.

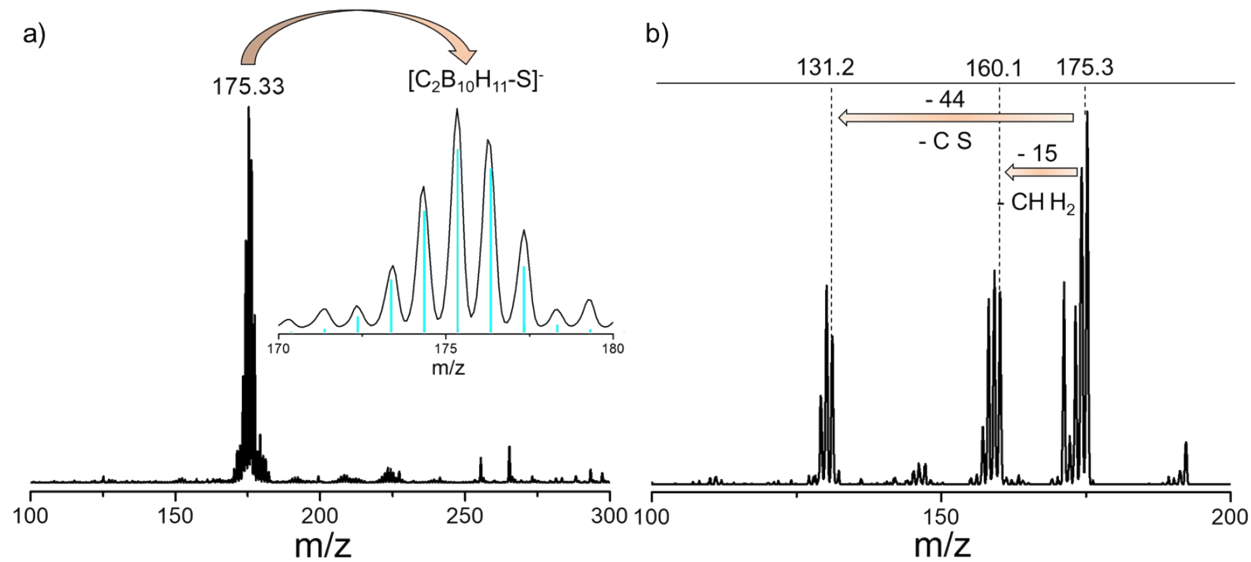

**Fig. S58** a) Negative ion-mode ESI-MS spectrum of *meta*-carborane 9-thiol ligand. Inset shows isotopic distribution of the experimental spectrum (black), centered at  $m/z$  175.33 matches well with theoretical spectrum (cyan). b) The MS/MS fragmentation of the molecular ion peak shows the losses of different fragments from the carborane framework.

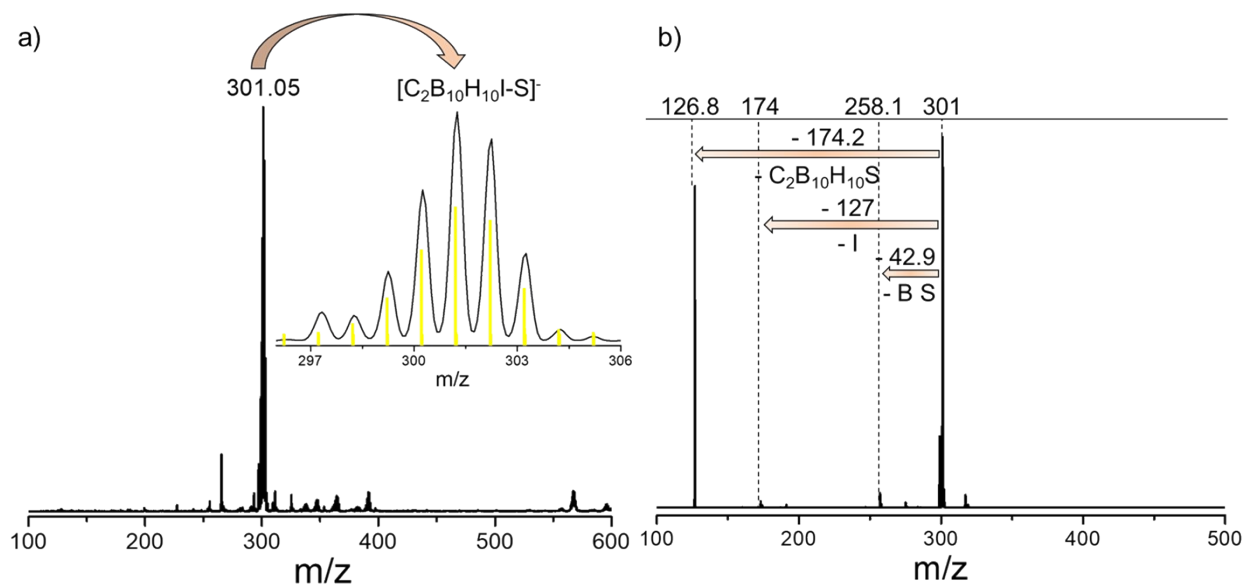

**Fig. S59** a) Negative ion-mode ESI-MS spectrum of *ortho*-carborane 12-iodo 9-thiol ligand. Inset shows isotopic distribution of the experimental spectrum (black), centered at m/z 301.5 with theoretical spectrum (yellow). b) The MS/MS fragmentation of the molecular ion peak shows the losses of different fragments.

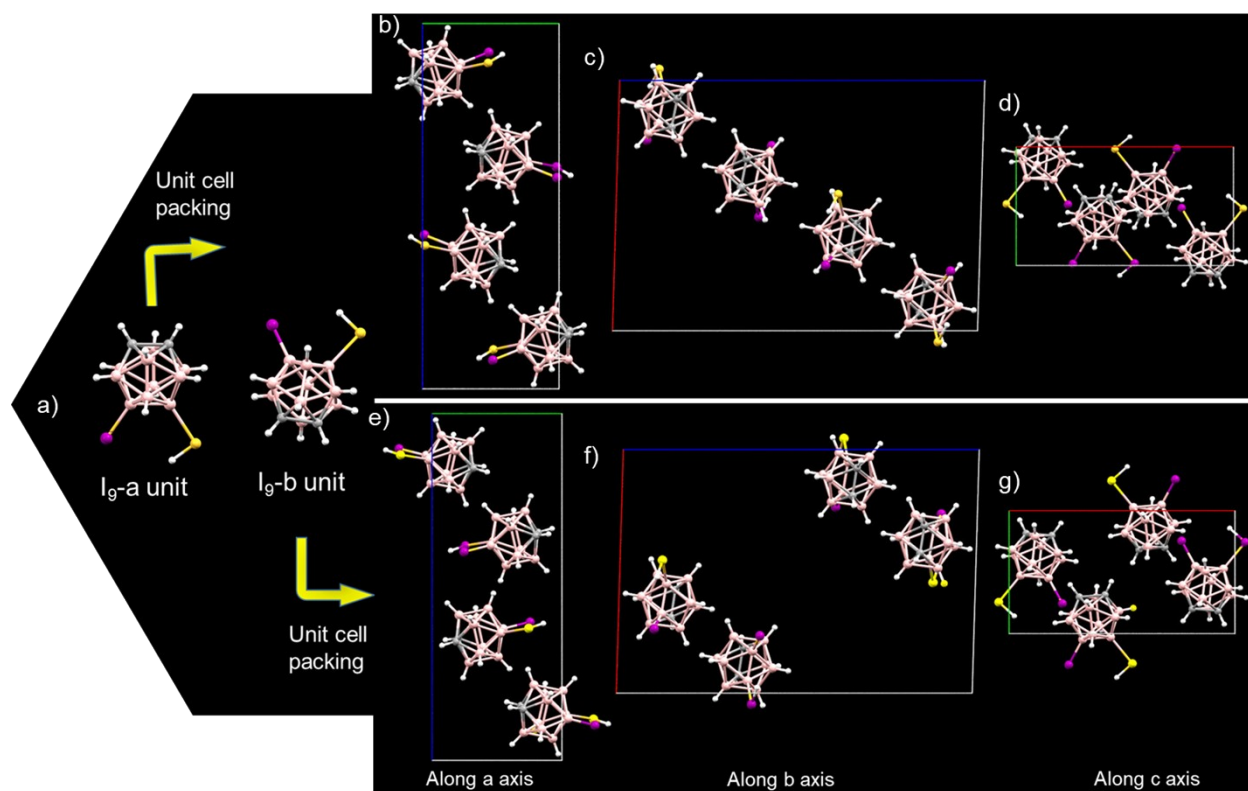

**Fig. S60** a) Molecular structure of  $I_9$  ligand with two different units. Independent unit cell molecular packing of  $I_9$ -a unit viewed from b) a, c) b and d) c crystallographic axis and  $I_9$ -b unit viewed from e) a, f) b and g) c crystallographic axis.

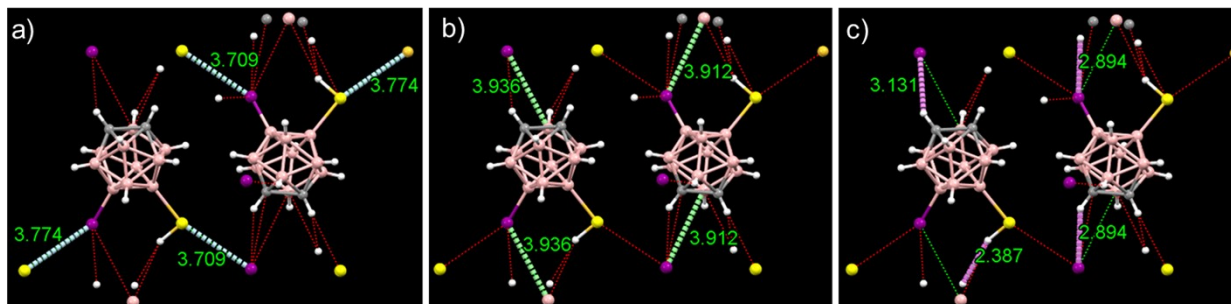

**Fig. S61** Intermolecular interactions between  $I_9$ -a and  $I_9$ -b units. Three short contact interactions *i.e.*, a)  $S \cdots I$ , b)  $I \cdots B$ , c)  $CH \cdots I$  or  $CH \cdots S$  are present between these two units. Interatomic distances are marked here.

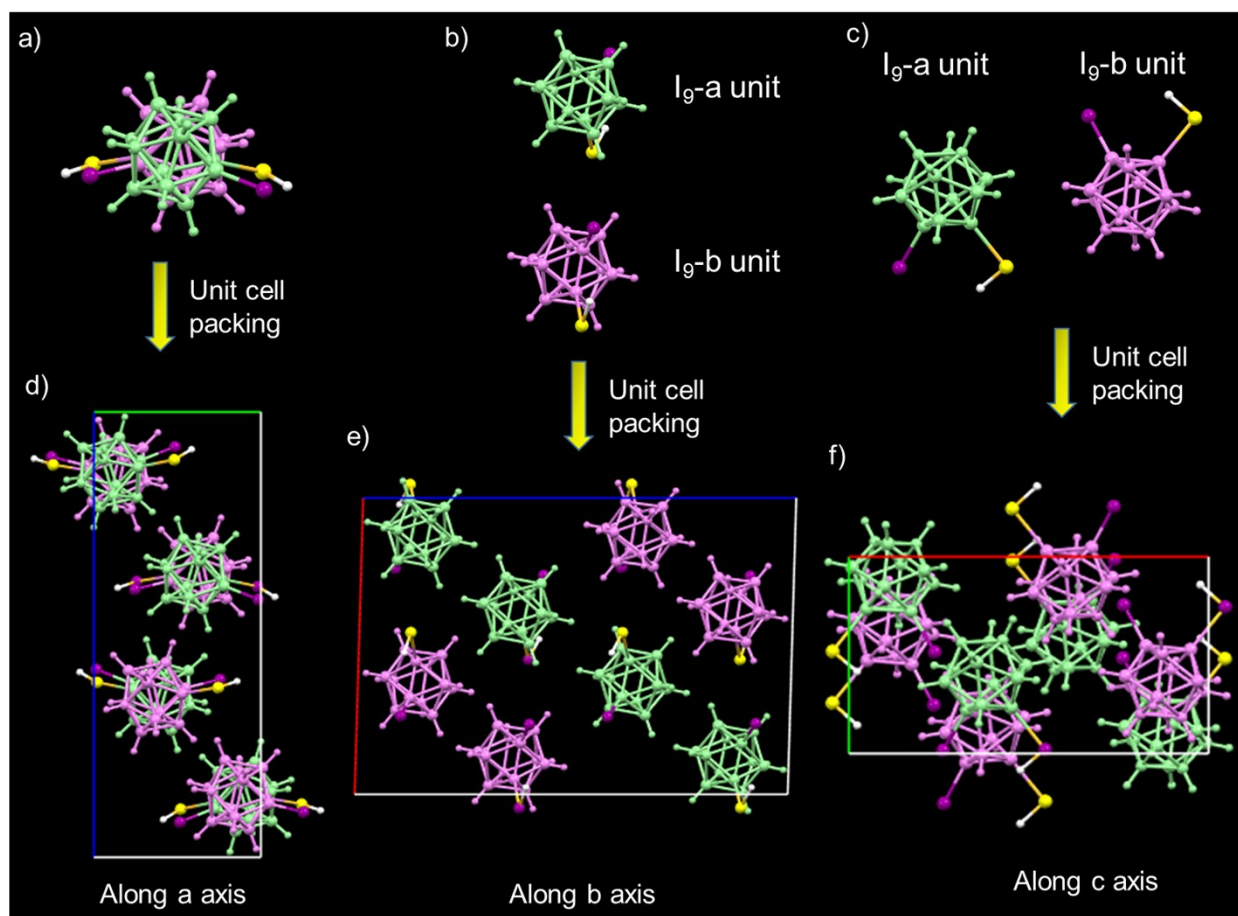

**Fig. S62** Molecular structure of  $I_9$  ligand having two different units viewed from a) a, b) b and c) c crystallographic axis. Combined unit cell molecular packing viewed from d) a, e) b and f) c crystallographic axis.

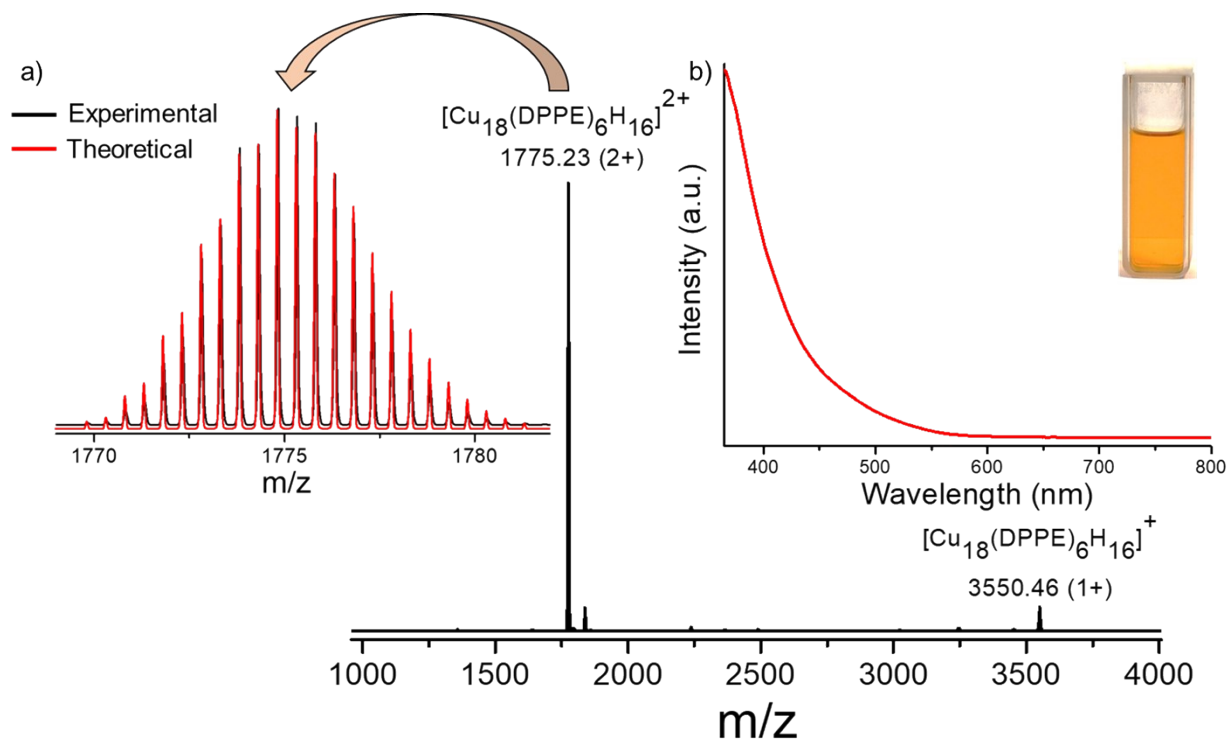

**Fig. S63** Characterizations of the  $[\text{Cu}_{18}(\text{DPPE})_6\text{H}_{16}]^{2+}$ . a) The full range mass spectrum of the NC in positive ion-mode indicates presence of mono and di-cationic species (inset shows exact matching of isotopic distribution of theoretical and experimental spectrum of the di-cationic species), b) UV-vis absorption spectrum of  $\text{Cu}_{18}$  (inset shows the photographic image of the orange colored cluster in DCM).

## References:

- (1) C. C. D. CrysAlis, Xcalibur PX Software, Oxford Diffraction Ltd., Abingdon, Engl. 2008.
- (2) Palatinus, L.; Chapuis, G. SUPERFLIP - a computer program for the solution of crystal structures by charge flipping in arbitrary dimensions. *J. Appl. Cryst.* 2007, **40**, 786-790.
- (3) Petříček, Václav; Dušek, Michal; Palatinus, Lukáš. Crystallographic Computing System JANA2006: General features. *Zeitschrift Für Krist. Mater.* 2014, **229**, 345.
- (4) Mortensen, J. J.; Hansen, L. B.; Jacobsen, K. W. Real-Space Grid Implementation of the Projector Augmented Wave Method. *Phys. Rev. B - Condens. Matter Mater. Phys.* 2005, **71** (035109), 1–11.
- (5) Enkovaara, J.; Rostgaard, C.; Mortensen, J. J.; Chen, J.; Dułak, M.; Ferrighi, L.; Gavnholt, J.; Glinsvad, C.; Haikola, V.; Hansen, H. A.; Kristoffersen, H. H.; Kuisma, M.; Larsen, A. H.; Lehtovaara, L.; Ljungberg, M.; Lopez-Acevedo, O.; Moses, P. G.; Ojanen, J.; Olsen, T.; Petzold, V.; Romero, N. A.; Stausholm-Møller, J.; Strange, M.; Tritsarlis, G. A.; Vanin, M.; Walter, M.; Hammer, B.; Häkkinen, H.; Madsen, G. K. H.; Nieminen, R. M.; Nørskov, J. K.; Puska, M.; Rantala, T. T.; Schiøtz, J.; Thygesen, K. S.; Jacobsen, K. W. Electronic Structure Calculations with GPAW: A Real-Space Implementation of the Projector Augmented-Wave Method. *J. Phys. Condens. Matter* 2010, **22** (253202), 1–24.
- (6) Adamo, C.; Barone, V. Physically Motivated Density Functionals with Improved Performances: The Modified Perdew-Burke-Ernzerhof Model. *J. Chem. Phys.* 2002, **116** (14), 5933–5940.
- (7) Adamo, C.; Barone, V. Toward Reliable Density Functional Methods without Adjustable Parameters: The PBE0 Model. *J. Chem. Phys.* 1999, **110**, 6158–6170.
- (8) Mennucci, B.; Tomasi, J.; Cammi, R.; Cheeseman, J. R.; Frisch, M. J.; Devlin, F. J.; Gabriel, S.; Stephens, P. J. Polarizable Continuum Model (PCM) Calculations of Solvent Effects on Optical Rotations of Chiral Molecules. *J. Phys. Chem. A* 2002, **106**, 6102–6113.
- (9) Cossi, M.; Rega, N.; Scalmani, G.; Barone, V. Energies, Structures and Electronic Properties of Molecules in Solution with the C-PCM Solvation Model. *J. Comput. Chem.* 2003, **24**, 669–681.
- (0) Tomasi, J.; Mennucci, B.; Cammi, R. Quantum mechanical continuum solvation models, *Chem. Rev.*, 2005, **105**, 2999-3093.
- (1) Frisch, M. J.; Trucks, G. W.; Schlegel, H. B.; Scuseria, G. E.; Robb, M. A.; Cheeseman, J. R.; Scalmani, G.; Barone, V.; Petersson, G. A.; Nakatsuji, H.; Li, X.; Caricato, M.; Marenich, A. V.; Bloino, J.; Janesko, B. G.; Gomperts, R.; Mennucci, B.; Hratchian, H. P.; Ortiz, J. V.; Izmaylov, A. F.; Sonnenberg, J. L.; Williams-Young, D.; Ding, F.; Lipparini, F.; Egidi, F.; Goings, J.; Peng, B.; Petrone, A.; Henderson, T.; Ranasinghe, D.; Zakrzewski, V. G.; Gao, J.; Rega, N.; Zheng, G.; Liang, W.; Hada, M.; Ehara, M.; Toyota, K.; Fukuda, R.; Hasegawa, J.; Ishida, M.; Nakajima, T.; Honda, Y.; Kitao, O.; Nakai, H.; Vreven, T.; Throssell, K.; Montgomery, J. A. Jr.; Peralta, J. E.; Ogliaro, F.; Bearpark, M. J.; Heyd, J. J.; Brothers, E. N.; Kudin, K. N.; Staroverov, V. N.; Keith, T. A.; Kobayashi, R.; Normand, J.; Raghavachari, K.; Rendell, A. P.; Burant, J. C.; Iyengar, S. S.; Tomasi, J.; Cossi, M.; Millam, J. M.; Klene, M.; Adamo, C.; Cammi, R.; Ochterski, J. W.; Martin, R. L.; Morokuma, K.; Farkas, O.; Foresman, J. B.; Fox, D. J. Gaussian 16, Revision C.01, *Gaussian, Inc.*, Wallingford CT, 2019.
- (2) Adamo, C.; Barone, V. Toward reliable density functional methods without adjustable parameters: The PBE0 model. *J. Chem. Phys.*, 1999, **110**, 6158-6169.
- (3) a) Dunning, T. H. Jr.; Hay P. J. in *Modern Theoretical Chemistry*, Ed. H. F. Schaefer III, Vol. 3

- (Plenum, New York, 1977), 1-28.
- b) Wadt, W. R.; Hay P. J. Ab initio effective core potentials for molecular calculations – potentials for main group elements Na to Bi, *J. Chem. Phys.*, 1985, **82**, 284-298.
- (14) Leites, L. A. Vibrational Spectroscopy of Carboranes and Parent Boranes and Its Capabilities in Carborane Chemistry. *Chem. Rev.* 1992, **92** (2), 279–323.
